# Supplementary material for: Phosphorescent biaryl platinum(iv) complexes obtained through double metalation of dibenzoiodolium ions
Source: Royal Society of Chemistry journal article supplement (doi:10.1039/d2cc01018f), 2022-01-01
Supplement: d2cc01018f1.pdf [file d2cc01018f1.pdf]

## ELECTRONIC SUPPLEMENTARY INFORMATION

### Phosphorescent biaryl Pt(IV) complexes obtained through double metalation of dibenzoiodolium ions

Juan Carlos López-López, Delia Bautista, and Pablo González-Herrero\*

#### Contents:

|                                                                 |    |
|-----------------------------------------------------------------|----|
| 1. Experimental details .....                                   | 2  |
| 1.1. General considerations and materials .....                 | 2  |
| 1.2. Spectroscopic and analytical methods .....                 | 2  |
| 1.3. Synthesis and characterization data of new complexes ..... | 2  |
| 1.4. X-ray structure determinations .....                       | 7  |
| 1.5. Photophysical characterization .....                       | 8  |
| 1.6. Computational methods .....                                | 8  |
| 2. NMR spectra of new compounds .....                           | 9  |
| 3. Additional discussion on NMR data.....                       | 20 |
| 4. Additional photophysical data and discussion .....           | 21 |
| 5. Computational data.....                                      | 28 |
| 5.1. Complex 2aa .....                                          | 28 |
| 5.2. Complex 2ab.....                                           | 32 |
| 5.3. Complex 2ac .....                                          | 36 |
| 5.4. Complex 2ca .....                                          | 40 |
| 5.5. Complex 2cb.....                                           | 44 |
| 5.6. Complex 2cc .....                                          | 48 |
| 5.7. Spin densities .....                                       | 52 |
| 5.8. Supplementary computational data.....                      | 55 |
| 6. References .....                                             | 70 |

# 1. Experimental details

## 1.1. General considerations and materials

Unless otherwise noted, all reactions were carried out at room temperature using extra-dry MeCN and flame-dried glassware under an N<sub>2</sub> atmosphere. Synthesis grade Et<sub>2</sub>O and CH<sub>2</sub>Cl<sub>2</sub> were degassed and dried using a Pure Solv MD-5 solvent purification system from Innovative Technologies, Inc. Other solvents were used as received. Complexes *cis*-[Pt(C<sup>N</sup>)<sub>2</sub>] [C<sup>N</sup> = ppy (**1a**), tpy (**1b**) or thpy (**1c**)]<sup>1,2</sup> and the dibenziodolium triflates<sup>3,4</sup> were prepared following published procedures. All other reagents were obtained from commercial sources. Irradiations were performed using a previously described setup.<sup>1</sup>

## 1.2. Spectroscopic and analytical methods

NMR spectra were registered on Bruker Avance 600, 400 or 300 MHz spectrometers at 298 K. Chemical shifts are referred to residual signals of non-deuterated solvents and are given in ppm downfield from tetramethylsilane. Elemental analyses were carried out with a LECO CHNS-932 microanalyzer. High-resolution electrospray ionization mass spectra (ESI-MS) were recorded on an Agilent 6220 Accurate-Mass time-of-flight (TOF) LC/MS.

## 1.3. Synthesis and characterization data of new complexes

**General procedure for the synthesis of [Pt(C<sup>N</sup>)<sub>2</sub>(C<sup>C</sup>)] complexes [C<sup>N</sup> = cyclometalated 2-phenylpyridine (ppy), 2-(*p*-tolyl)pyridine (tpy) or 2-(2-thienyl)pyridine, and C<sup>C</sup> = dimetalated 4,4'-di-*tert*-butylbiphenyl (dbbph), biphenyl (bph) or 4,4'-difluorobiphenyl (dFbph)] (**2**). To a suspension of the appropriate complex **1** (0.20 mmol) in MeCN (20 mL) was added the dibenziodolium triflate (0.1 mmol) and the mixture was stirred at 60 °C for 24 h. The resulting pale yellow solution was cooled to room temperature and the solvent was evaporated under reduced pressure. The residue was chromatographed on silica gel using a hexane/AcOEt (4:1) mixture as the eluent. The corresponding complex **2** was isolated after partial evaporation of the solvents and addition of pentane.**

**[Pt(ppy)<sub>2</sub>(dbbph)] (2aa)**. White solid. Yield: 68%. <sup>1</sup>H NMR (400.9 MHz, CD<sub>2</sub>Cl<sub>2</sub>): δ 8.05 (d, *J* = 9.1 Hz, 1H), 8.01 (d, *J* = 9.1 Hz, 1H), 7.96 (ddd with satellites, *J*<sub>PtH</sub> = 13.7 Hz, *J*<sub>HH</sub> = 0.8, 1.7, 5.5 Hz, 1H), 7.90-7.80 (m, 3H), 7.74 (dd with satellites, *J*<sub>PtH</sub> = 14.0 Hz, *J* = 7.8, 1.5 Hz, 1H), 7.62 (ddd with satellites, *J*<sub>PtH</sub> = 9.1 Hz, *J*<sub>HH</sub> = 5.5, 1.7, 0.8 Hz, 1H), 7.40 (d, *J* = 8.4 Hz, 1H), 7.35-7.28 (m, 1H), 7.19-6.95 (m, 8H), 6.89 (dd with satellites, *J*<sub>PtH</sub> = 48.5 Hz, *J*<sub>HH</sub> = 7.8, 1.2 Hz, 1H), 6.77 (dd with satellites, *J*<sub>PtH</sub> = 25.1 Hz, *J*<sub>HH</sub> = 7.3, 1.5 Hz, 1H), 6.64 (d with satellites, *J*<sub>PtH</sub> = 50.1 Hz, *J*<sub>HH</sub> = 2.1 Hz, 1H), 6.27 (d with satellites, *J*<sub>PtH</sub> = 20.1 Hz, *J*<sub>HH</sub> = 2.1 Hz, 1H), 1.06 (s, 9H), 1.01 (s, 9H). <sup>13</sup>C NMR (151 MHz, CD<sub>2</sub>Cl<sub>2</sub>): δ 169.8 (*J*<sub>PtC</sub> = 589.8 Hz, C), 167.4 (C), 163.4 (*J*<sub>PtC</sub> = 53.3 Hz, C), 161.6 (*J*<sub>PtC</sub> = 561.3 Hz, C), 150.1 (*J*<sub>PtC</sub> = 36.7 Hz, C), 149.5 (C), 149.4 (C), 149.20 (CH), 146.4 (CH), 144.9 (*J*<sub>PtC</sub> = 891.3 Hz, C), 144.6 (C), 143.1 (*J*<sub>PtC</sub> = 891.3 Hz, C), 140.8 (C), 139.3 (CH), 138.4 (CH), 135.0 (*J*<sub>PtC</sub> = 38.3 Hz, CH), 132.3 (*J*<sub>PtC</sub> = 57.1 Hz, CH), 131.6 (*J*<sub>PtC</sub> = 53.1 Hz, CH), 131.3 (*J*<sub>PtC</sub> = 40.0 Hz, CH), 131.3 (*J*<sub>PtC</sub> = 36.7 Hz, C), 130.3 (*J*<sub>PtC</sub> = 36.3 Hz, CH), 127.4 (CH), 125.2 (CH), 125.1 (CH), 124.1 (CH), 123.9 (CH), 123.4 (CH), 123.3 (CH), 121.5 (CH), 121.0 (CH), 120.8 (CH), 120.73 (CH), 120.67 (CH), 120.59 (CH), 34.8 (C), 34.7 (C), 31.7 (CH<sub>3</sub>), 31.6 (CH<sub>3</sub>). Elemental analysis calcd (%) for C<sub>42</sub>H<sub>40</sub>N<sub>2</sub>Pt: C 65.70, H 5.25, N 3.65; found: C 65.74, H 5.23, N 3.66.

**[Pt(ppy)<sub>2</sub>(bph)] (2ab)**. White solid. Yield: 58%. <sup>1</sup>H NMR (400.9 MHz, CD<sub>2</sub>Cl<sub>2</sub>): δ 8.09-7.96 (m, 3H), 7.89-7.79 (m, 3H), 7.75 (dd, *J* = 7.7, 1.4 Hz, 1H), 7.61-7.54 (m, 2H), 7.51 (dd with satellites, *J*<sub>PtH</sub> = 7.1

Hz,  $J_{\text{HH}} = 1.3$  Hz, 1H), 7.19-6.93 (m, 8H), 6.87-6.73 (m, 3H), 6.73-6.50 (m, 2H), 6.35 (dd with satellites,  $J_{\text{PtH}} = 26.9$  Hz,  $J_{\text{HH}} = 7.2$ , 1.1 Hz, 1H).  $^{13}\text{C}$  NMR (151 MHz,  $\text{CD}_2\text{Cl}_2$ ):  $\delta$  169.3 ( $J_{\text{PtC}} = 589.1$  Hz, C), 167.1 ( $J_{\text{PtC}} = 23.1$  Hz, C), 163.1 ( $J_{\text{PtC}} = 47.1$  Hz, C), 162.1 ( $J_{\text{PtC}} = 561.9$  Hz, C), 152.9 ( $J_{\text{PtC}} = 39.4$  Hz, C), 152.9 ( $J_{\text{PtC}} = 60.9$  Hz, C), 149.4 (CH), 146.3 (CH), 144.5 ( $J_{\text{PtC}} = 884.0$  Hz, C), 144.5 (C), 143.7 ( $J_{\text{PtC}} = 889.6$  Hz, C), 140.7 (C), 139.4 (CH), 138.6 (CH), 134.7 ( $J_{\text{PtC}} = 39.4$  Hz, CH), 133.1 ( $J_{\text{PtC}} = 33.4$  Hz, CH), 132.2 ( $J_{\text{PtC}} = 57.0$  Hz, CH), 131.6 ( $J_{\text{PtC}} = 62.0$  Hz, CH), 131.5 ( $J_{\text{PtC}} = 36.0$  Hz, CH), 131.2 (CH), 127.3 ( $J_{\text{PtC}} = 23.6$  Hz, CH), 127.2 ( $J_{\text{PtC}} = 60.0$  Hz, CH), 125.4 ( $J_{\text{PtC}} = 19.7$  Hz, CH), 125.2 ( $J_{\text{PtC}} = 33.4$  Hz, CH), 124.7 (CH), 124.6 (CH), 124.2 (CH), 124.0 (CH), 123.6 (CH), 123.5 (CH), 121.7 ( $J_{\text{PtC}} = 45.4$  Hz, CH), 121.5 ( $J_{\text{PtC}} = 29.5$  Hz, CH), 120.9 (CH), 120.8 (CH). Elemental analysis calcd (%) for  $\text{C}_{34}\text{H}_{24}\text{N}_2\text{Pt}$ : C 66.40, H 5.57, N 3.52; found: C 66.66, H 5.52, N 3.57.

**[Pt(ppy)<sub>2</sub>(dFbph)] (2ac)**. White solid. Yield: 60%.  $^1\text{H}$  NMR (400.9 MHz,  $\text{CD}_2\text{Cl}_2$ ):  $\delta$  8.09-7.93 (m, 3H), 7.93-7.79 (m, 3H), 7.76 (dd,  $J = 7.8$ , 1.6 Hz, 1H), 7.55 (dd with satellites,  $J_{\text{PtH}} = 10.0$  Hz,  $J_{\text{HH}} = 5.7$ , 1.6 Hz, 1H), 7.51-7.44 (m, 1H), 7.44-7.35 (m, 1H), 7.22-6.95 (m, 6H), 6.86-6.61 (m, 4H), 6.27 (dd with satellites,  $J_{\text{PtH}} = 54.1$  Hz,  $J_{\text{FH}} = 10.0$ ,  $J_{\text{HH}} = 2.8$  Hz, 1H), 6.05 (dd with satellites,  $J_{\text{PtH}} = 22.6$  Hz,  $J_{\text{FH}} = 8.5$ ,  $J_{\text{HH}} = 2.8$  Hz, 1H).  $^{19}\text{F}$  NMR (282.4 MHz,  $\text{CD}_2\text{Cl}_2$ ):  $\delta$  -116.9 (m, 1F), -117.3 (m, 1F).  $^{13}\text{C}$  NMR (151 MHz,  $\text{CD}_2\text{Cl}_2$ ):  $\delta$  167.2 ( $J_{\text{PtC}} = 589.5$  Hz, C), 166.9 ( $J_{\text{PtC}} = 25.2$  Hz, C), 164.3 ( $J_{\text{PtC}} = 561.9$  Hz, C), 163.1 ( $J_{\text{PtC}} = 52.1$  Hz, C), 162.6 (d,  $J_{\text{CF}} = 250.3$  Hz, C), 161.3 ( $J_{\text{CF}} = 147.3$  Hz, C), 149.3 (CH), 148.2 ( $J_{\text{PtC}} = 35.3$  Hz, C), 147.2 ( $J_{\text{PtC}} = 60.5$  Hz, C), 146.2 (CH), 144.3 (C), 144.2 (C), 143.7 ( $J_{\text{PtC}} = 869.1$  Hz, C), 140.6 (C), 139.7 (CH), 139.0 (CH), 134.5 ( $J_{\text{PtC}} = 38.3$  Hz, CH), 132.1 ( $J_{\text{PtC}} = 54.5$  Hz, CH), 131.9 (CH), 131.8 ( $J_{\text{PtC}} = 38.4$  Hz, CH), 125.6 ( $J_{\text{PtC}} = 16.2$  Hz, CH), 125.3 ( $J_{\text{PtC}} = 33.0$  Hz, CH), 124.6 (CH), 124.1 (CH), 123.8 (CH), 122.7-122.1 (m, CH), 121.1 (CH), 121.0 (CH), 119.6 ( $J_{\text{PtC}} = 32.3$  Hz, CH), 119.4 ( $J_{\text{PtC}} = 39.5$  Hz, CH), 117.6 (CH), 117.5 (CH), 111.0 (CH). Elemental analysis calcd (%) for  $\text{C}_{34}\text{H}_{22}\text{F}_2\text{N}_2\text{Pt}$ : C 59.04, H 3.21, N 4.05; found: C 59.10, H 3.29, N 4.00.

**[Pt(tpy)<sub>2</sub>(dbbph)] (2ba)**. White solid. Yield: 52%.  $^1\text{H}$  NMR (400.9 MHz,  $\text{CD}_2\text{Cl}_2$ ):  $\delta$  7.99 (d,  $J = 8.2$  Hz, 1H), 7.94 (d,  $J = 8.1$  Hz, 1H), 7.90 (ddd with satellites,  $J_{\text{PtH}} = 13.0$  Hz,  $J_{\text{HH}} = 5.6$ , 1.7, 0.8 Hz, 1H), 7.86-7.74 (m, 2H), 7.70 (d,  $J = 8.0$  Hz, 1H), 7.66-7.59 (m, 1H), 7.57 (ddd with satellites,  $J_{\text{PtH}} = 8.8$  Hz,  $J_{\text{HH}} = 5.6$ , 1.7, 0.8 Hz, 1H), 7.40 (d,  $J = 8.0$  Hz, 1H), 7.34-7.29 (m, 1H), 7.11-6.88 (m, 6H), 6.76 (s with satellites,  $J_{\text{PtH}} = 25.5$  Hz, 1H), 6.71 (d with satellites,  $J_{\text{PtH}} = 50.7$  Hz,  $J_{\text{HH}} = 2.2$  Hz, 1H), 6.57 (s with satellites,  $J_{\text{PtH}} = 50.0$  Hz, 1H), 6.26 (d with satellites,  $J_{\text{PtH}} = 20.1$  Hz,  $J_{\text{HH}} = 2.1$  Hz, 1H), 2.18 (s, 3H), 2.15 (s, 3H), 1.07 (s, 9H), 1.04 (s, 9H).  $^{13}\text{C}$  NMR (151 MHz,  $\text{CD}_2\text{Cl}_2$ ):  $\delta$  170.0 ( $J_{\text{PtC}} = 597.5$  Hz, C), 167.6 ( $J_{\text{PtC}} = 27.1$  Hz, C), 163.6 ( $J_{\text{PtC}} = 45.4$  Hz, C), 161.8 ( $J_{\text{PtC}} = 563.4$  Hz, C), 150.1 ( $J_{\text{PtC}} = 38.5$  Hz, C), 149.4 ( $J_{\text{PtC}} = 64.0$  Hz, C), 149.3 (2 C), 149.0 ( $J_{\text{PtC}} = 13.5$  Hz, CH), 146.2 (CH), 145.0 ( $J_{\text{PtC}} = 887.0$  Hz, C), 143.2 ( $J_{\text{PtC}} = 887.0$  Hz, C), 142.0 (C), 141.9 ( $J_{\text{PtC}} = 63.4$  Hz, C), 141.3 ( $J_{\text{PtC}} = 34.1$  Hz, C), 139.1 (CH), 138.3 (CH), 138.2 (C), 135.7 ( $J_{\text{PtC}} = 38.5$  Hz, CH), 133.0 ( $J_{\text{PtC}} = 59.2$  Hz, CH), 130.5 ( $J_{\text{PtC}} = 36.0$  Hz, CH), 127.4 ( $J_{\text{PtC}} = 15.8$  Hz, CH), 125.1 ( $J_{\text{PtC}} = 19.8$  Hz, CH), 125.0 (CH), 124.9 ( $J_{\text{PtC}} = 35.7$  Hz, CH), 124.2 (CH), 123.2 ( $J_{\text{PtC}} = 15.8$  Hz, CH), 122.8 (CH), 121.3 (CH), 120.8 (CH), 120.58 (CH), 120.51 (CH), 120.4 (CH), 120.3 (CH), 34.74 (C), 34.71 (C), 31.7 (3CH<sub>3</sub>), 31.6 (3CH<sub>3</sub>), 22.2 (CH<sub>3</sub>), 22.0 (CH<sub>3</sub>). Elemental analysis calcd (%) for  $\text{C}_{44}\text{H}_{44}\text{N}_2\text{Pt}$ : C 66.40, H 5.57, N 3.52; found: C 66.66, H 5.52, N 3.57.

**[Pt(tpy)<sub>2</sub>(bph)] (2bb)**. White solid. Yield: 80%.  $^1\text{H}$  NMR (400.9 MHz,  $\text{CD}_2\text{Cl}_2$ ):  $\delta$  8.06-7.88 (m, 3H), 7.84-7.76 (m, 2H), 7.70 (d,  $J = 7.9$  Hz, 1H), 7.67-7.60 (m, 1H), 7.56 (dd,  $J = 7.6$ , 1.4 Hz, 1H), 7.53-7.43 (m, 2H), 7.10-6.87 (m, 6H), 6.81-6.73 (m, 1H), 6.68 (s with satellites,  $J_{\text{PtH}} = 12.8$  Hz, 1H), 6.66-6.61 (m, 2H), 6.57 (s with satellites,  $J_{\text{PtH}} = 24.8$  Hz, 1H), 6.32 (d with satellites,  $J_{\text{PtH}} = 27.2$ ,  $J_{\text{HH}} = 7.3$ , 1 Hz, 1H), 2.15 (s, 3H), 2.15 (s, 3H).  $^{13}\text{C}$  NMR (151 MHz,  $\text{CD}_2\text{Cl}_2$ ):  $\delta$  169.5 ( $J_{\text{PtC}} = 588.4$  Hz, C), 167.2 (C), 163.2 (C), 162.4 ( $J_{\text{PtC}} = 555.0$  Hz, C), 152.9 ( $J_{\text{PtC}} = 34.0$  Hz, C), 152.2 ( $J_{\text{PtC}} = 60.8$  Hz, C), 149.1 ( $J_{\text{PtC}} =$

35.3 Hz, CH), 152.6 ( $J_{\text{PtC}} = 60.9$  Hz, CH), 149.1 ( $J_{\text{PtC}} = 12.5$  Hz, CH), 146.1 (CH), 144.5 ( $J_{\text{PtC}} = 873.0$  Hz, C), 143.7 ( $J_{\text{PtC}} = 893.0$  Hz, C), 142.0 ( $J_{\text{PtC}} = 63.7$  Hz, C), 141.8 (C), 141.5 ( $J_{\text{PtC}} = 34.6$  Hz, C) 139.3 (CH), 138.4 (CH), 138.0 (C), 135.4 ( $J_{\text{PtC}} = 38.1$  Hz, CH), 133.0 ( $J_{\text{PtC}} = 31.8$  Hz, CH), 132.7 ( $J_{\text{PtC}} = 56.6$  Hz, CH), 131.2 ( $J_{\text{PtC}} = 13.2$  Hz, CH), 127.3 ( $J_{\text{PtC}} = 25.4$  Hz, CH), 127.1 ( $J_{\text{PtC}} = 58.4$  Hz, CH), 125.3 (CH), 125.2 (CH), 125.0 ( $J_{\text{PtC}} = 35.1$  Hz, CH), 124.6 (CH), 124.5 (CH), 123.4 (CH), 123.0 (CH), 121.7 ( $J_{\text{PtC}} = 43.2$  Hz, CH), 121.5 ( $J_{\text{PtC}} = 27.6$  Hz, CH), 120.5 (CH), 120.4 (CH), 22.2 (CH<sub>3</sub>), 22.1 (CH<sub>3</sub>). Elemental analysis calcd (%) for C<sub>36</sub>H<sub>28</sub>N<sub>2</sub>Pt: C 63.24, H 4.13, N 4.10; found: C 63.22, H 4.14, N 4.01.

**[Pt(tpy)<sub>2</sub>(dFbph)] (2bc).** White solid. Yield: 72%. <sup>1</sup>H NMR (600 MHz, CD<sub>2</sub>Cl<sub>2</sub>): δ 8.02 (d,  $J_{\text{HH}} = 8.1$  Hz, 1H), 8.00 (d,  $J_{\text{HH}} = 8.1$  Hz, 1H), 7.93 (d with satellites,  $J_{\text{PtH}} = 12.7$ ,  $J_{\text{HH}} = 6.1$  Hz, 1H), 7.89-7.82 (m, 2H), 7.71 (dd,  $J_{\text{HH}} = 8.0$ , 2.3 Hz, 1H), 7.68-7.61 (m, 1H), 7.55-7.48 (m, 2H), 7.42 (dd,  $J_{\text{HH}} = 8.5$  Hz,  $J_{\text{FH}} = 5.8$  Hz, 1H), 7.11-7.03 (m, 2H), 7.03-6.97 (m, 2H), 6.77-6.70 (m, 2H), 6.66 (s with satellites,  $J_{\text{PtH}} = 28.0$  Hz, 1H), 6.58 (s with satellites,  $J_{\text{PtH}} = 48.0$  Hz, 1H), 6.30 (dd with satellites,  $J_{\text{PtH}} = 54.4$  Hz,  $J_{\text{FH}} = 9.9$ ,  $J_{\text{HH}} = 2.8$  Hz, 1H), 6.02 (dd with satellites,  $J_{\text{PtH}} = 22.5$  Hz,  $J_{\text{FH}} = 8.4$ ,  $J_{\text{HH}} = 2.6$  Hz, 1H), 2.18 (s, 3H), 2.16 (s, 3H). <sup>19</sup>F NMR (282.4 MHz, CD<sub>2</sub>Cl<sub>2</sub>): δ -117.1 (m, 1F), -117.4 (m, 1F). <sup>13</sup>C NMR (151 MHz, CD<sub>2</sub>Cl<sub>2</sub>): δ 166.7 (C), 166.4 ( $J_{\text{PtC}} = 28.4$  Hz, C), 164.1 (C), 162.7 (C), 162.3 (d,  $J_{\text{CF}} = 248.7$  Hz, C), 160.8 (d,  $J_{\text{CF}} = 248.7$  Hz, C), 148.5 (CH), 147.6 (C), 146.7 (C), 145.4 (CH), 143.74 (C), 143.72 (C), 143.2 (C), 141.7 ( $J_{\text{PtC}} = 64.6$  Hz, C), 141.3 (C), 141.1 (C), 138.9 (CH), 138.2 (CH), 137.4 (C), 134.7 ( $J_{\text{PtC}} = 40.2$  Hz, CH), 132.0 ( $J_{\text{PtC}} = 57.5$  Hz, CH), 125.0 (CH), 124.9 ( $J_{\text{PtC}} = 18.1$  Hz, CH), 124.5 ( $J_{\text{PtC}} = 33.1$  Hz, CH), 124.3 (CH), 122.9 (CH), 122.6 (CH), 122.5 - 121.1 (m, CH), 120.1 (CH), 120.06 (CH), 118.9 (CH), 118.8 (CH), 116.9 (CH), 116.8 (CH), 110.2 (t,  $J_{\text{CF}} = 21.7$  Hz, CH), 21.6 (CH<sub>3</sub>), 21.5 (CH<sub>3</sub>). Elemental analysis calcd (%) for C<sub>36</sub>H<sub>26</sub>F<sub>2</sub>N<sub>2</sub>Pt: C 60.08, H 3.64, N 3.89; found: C 60.21, H 3.59, N 3.66.

**[Pt(thpy)<sub>2</sub>(dbbph)] (2ca).** White solid. Yield: 66%. <sup>1</sup>H NMR (400.9 MHz, CD<sub>2</sub>Cl<sub>2</sub>): δ 7.82-7.56 (m, 6H), 7.41-7.34 (m, 2H), 7.34-7.24 (m, 2H), 7.06 (dd,  $J = 8.03$ , 2.1 Hz, 1H), 7.03-6.95 (m, 2H), 6.91-6.85 (m, 1H), 6.64 (d with satellites,  $J_{\text{PtH}} = 52.5$  Hz,  $J_{\text{HH}} = 2.3$  Hz, 1H), 6.59 (d with satellites,  $J_{\text{PtH}} = 13.7$  Hz,  $J_{\text{HH}} = 4.8$  Hz, 1H), 6.45 (d with satellites,  $J_{\text{PtH}} = 22.0$  Hz,  $J_{\text{HH}} = 2.3$  Hz, 1H), 6.35 (d with satellites,  $J_{\text{PtH}} = 22.0$  Hz,  $J_{\text{HH}} = 4.8$  Hz, 1H), 1.10 (s, 9H), 1.09 (s, 9H). <sup>13</sup>C NMR (151 MHz, CD<sub>2</sub>Cl<sub>2</sub>): δ 174.2 ( $J_{\text{PtC}} = 581.7$  Hz, C), 162.7 ( $J_{\text{PtC}} = 18.4$  Hz, C), 159.1 ( $J_{\text{PtC}} = 40.0$  Hz, C), 158.4 ( $J_{\text{PtC}} = 589.2$  Hz, C), 150.4 ( $J_{\text{PtC}} = 44.6$  Hz, C), 149.7 ( $J_{\text{PtC}} = 26.3$  Hz, C), 149.3 (C), 149.2 ( $J_{\text{PtC}} = 63.3$  Hz, C) 149.11 (CH), 147.0 (CH), 142.0 ( $J_{\text{PtC}} = 913.2$  Hz, C), 141.8 (C), 139.8 (CH), 138.8 (CH), 138.1 ( $J_{\text{PtC}} = 861.8$  Hz, C), 134.1 (C), 134.0 ( $J_{\text{PtC}} = 54.7$  Hz, CH), 131.4 ( $J_{\text{PtC}} = 72.8$  Hz, CH), 131.2 ( $J_{\text{PtC}} = 39.6$  Hz, CH), 129.9 ( $J_{\text{PtC}} = 37.8$  Hz, CH), 128.6 ( $J_{\text{PtC}} = 74.5$  Hz, CH), 127.7 (CH), 127.7 (CH), 121.4 ( $J_{\text{PtC}} = 14.8$  Hz, CH), 121.3 (CH), 121.0 (CH), 120.43 (CH), 120.39 (CH), 119.6 ( $J_{\text{PtC}} = 13.3$  Hz, CH), 119.5 ( $J_{\text{PtC}} = 12.0$  Hz, CH), 34.9 (C), 34.8 (C), 31.73 (CH<sub>3</sub>), 31.63 (CH<sub>3</sub>). Elemental analysis calcd (%) for C<sub>38</sub>H<sub>36</sub>N<sub>2</sub>PtS<sub>2</sub>: C 58.82, H 4.65, N 3.59, S 8.22; found: C 58.72, H 4.77, N 3.47, S 8.12.

**[Pt(thpy)<sub>2</sub>(bph)] (2cb).** Pale yellow solid. Yield: 40%. <sup>1</sup>H NMR (400.9 MHz, CD<sub>2</sub>Cl<sub>2</sub>): δ 7.82 (ddd with satellites,  $J_{\text{PtH}} = 16.0$  Hz,  $J_{\text{HH}} = 5.6$ , 1.6, 0.8 Hz, 1H), 7.78-7.69 (m, 2H), 7.67-7.57 (m, 3H), 7.54 (dd,  $J = 7.6$ , 1.4 Hz, 1H), 7.48 (dd with satellites,  $J_{\text{PtH}} = 6.8$  Hz,  $J_{\text{HH}} = 1.5$  Hz, 1H), 7.34 (d with satellites,  $J_{\text{PtH}} = 14.6$  Hz,  $J_{\text{HH}} = 4.7$  Hz, 1H), 7.27 (d with satellites,  $J_{\text{PtH}} = 11.3$  Hz,  $J_{\text{HH}} = 4.7$  Hz, 1H), 7.10-6.92 (m, 3H), 6.91-6.77 (m, 2H), 6.72-6.58 (m, 2H), 6.52 (d with satellites,  $J_{\text{PtH}} = 8.9$ ,  $J_{\text{HH}} = 4.5$  Hz, 1H), 6.49 (dd with satellites,  $J_{\text{PtH}} = 8.9$ ,  $J_{\text{HH}} = 7.3$ , 1.3 Hz, 1H), 6.35 (d with satellites,  $J_{\text{PtH}} = 20.2$  Hz,  $J_{\text{HH}} = 4.7$  Hz, 1H). <sup>13</sup>C NMR (151 MHz, CD<sub>2</sub>Cl<sub>2</sub>): δ 173.8 ( $J_{\text{PtC}} = 583.2$  Hz, C), 162.5 ( $J_{\text{PtC}} = 17.8$  Hz, C), 159.0 ( $J_{\text{PtC}} = 583.2$  Hz, C), 158.8 ( $J_{\text{PtC}} = 38.8$  Hz, C), 153.3 ( $J_{\text{PtC}} = 44.0$  Hz, C), 152.0 ( $J_{\text{PtC}} = 62.3$  Hz, C), 149.3 (CH), 146.8 (CH), 141.8 (C), 141.6 ( $J_{\text{PtC}} = 903.0$  Hz, C), 140.0 (CH), 139.0 (CH), 138.6 (C),

133.9 ( $J_{\text{PtC}} = 32.8$  Hz, CH), 133.8 ( $J_{\text{PtC}} = 55.1$  Hz, CH), 131.4 (C), 131.2 ( $J_{\text{PtC}} = 92.0$  Hz, CH), 130.1 ( $J_{\text{PtC}} = 36.8$  Hz, CH), 128.8 ( $J_{\text{PtC}} = 73.5$  Hz, CH), 127.5 ( $J_{\text{PtC}} = 24.0$  Hz, CH), 126.9 ( $J_{\text{PtC}} = 55.2$  Hz, CH), 125.0 (CH), 124.8 (CH), 121.54 ( $J_{\text{PtC}} = 891.3$  Hz, CH), 121.46 (CH), 121.3 (CH), 121.2 (CH), 119.7 (CH), 119.63 (CH), 119.59 (CH). Elemental analysis calcd (%) for  $\text{C}_{30}\text{H}_{20}\text{N}_2\text{PtS}_2$ : C 53.97, H 3.02, N 4.20, S 9.60; found: C 53.88, H 3.28, N 4.15, S 9.73.

**[Pt(thpy)<sub>2</sub>(dFbph)] (2cc)**. White solid. Yield: 76%. <sup>1</sup>H NMR (300.1 MHz, CD<sub>2</sub>Cl<sub>2</sub>):  $\delta$  7.83-7.73 (m, 3H), 7.67-7.50 (m, 2H), 7.58 (d with satellites,  $J_{\text{PtH}} = 9.8$  Hz,  $J_{\text{HH}} = 5.5$  Hz, 1H), 7.48-7.43 (m, 1H), 7.40-7.34 (m, 2H), 7.31 (d with satellites,  $J_{\text{PtH}} = 15.0$  Hz,  $J_{\text{HH}} = 4.8$  Hz, 1H), 6.98 (t,  $J_{\text{HH}} = 6.9$  Hz, 1H), 6.90 (t,  $J_{\text{HH}} = 6.9$  Hz, 1H), 6.77-6.70 (m, 2H), 6.50 (d with satellites,  $J_{\text{PtH}} = 13.6$  Hz,  $J_{\text{HH}} = 4.8$  Hz, 1H), 6.38 (d with satellites,  $J_{\text{PtH}} = 20.4$  Hz,  $J_{\text{HH}} = 4.8$  Hz, 1H), 6.30 (dd with satellites,  $J_{\text{PtH}} = 55.1$  Hz,  $J_{\text{FH}} = 9.5$ ,  $J_{\text{HH}} = 2.8$  Hz, 1H), 6.20 (dd with satellites,  $J_{\text{PtH}} = 24.3$  Hz,  $J_{\text{FH}} = 8.4$ ,  $J_{\text{HH}} = 2.8$  Hz, 1H). <sup>19</sup>F NMR (282.4 MHz, CD<sub>2</sub>Cl<sub>2</sub>):  $\delta$  -116.9 (m, 2F). <sup>13</sup>C NMR (151 MHz, CD<sub>2</sub>Cl<sub>2</sub>):  $\delta$  171.7 ( $J_{\text{PtC}} = 600.3$  Hz, C), 162.6 (d,  $J_{\text{CF}} = 247.8$  Hz, C), 161.9 (C), 161.8 (C), 161.1 ( $J_{\text{PtC}} = 600.0$  Hz, C), 161.09 (d,  $J_{\text{CF}} = 247.8$  Hz, C), 159.0 (C), 149.3 (CH), 148.7 ( $J_{\text{PtC}} = 42.4$  Hz, C), 147.2 ( $J_{\text{PtC}} = 58.8$  Hz, C), 146.8 (CH), 142.0 (C), 140.8 (C), 140.2 (CH), 139.4 (CH), 139.1 (C), 133.5 ( $J_{\text{PtC}} = 54.5$  Hz, CH), 131.0 ( $J_{\text{PtC}} = 91.8$  Hz, CH), 130.6 ( $J_{\text{PtC}} = 34.6$  Hz, CH), 129.2 ( $J_{\text{PtC}} = 75.3$  Hz, CH), 122.2 (CH), 121.7 (CH), 121.5 (CH), 120.5 ( $J_{\text{PtC}} = 45.2$  Hz, CH), 120.4 ( $J_{\text{PtC}} = 45.2$  Hz, CH), 119.9 (CH), 119.85 (CH), 117.8 (CH), 117.7 (CH), 111.2 (CH). Elemental analysis calcd (%) for  $\text{C}_{30}\text{H}_{18}\text{F}_2\text{N}_2\text{S}_2\text{Pt}$ : C 51.21, H 2.58, N 3.98; found: C 51.11, H 2.57, N 3.84.

**[Pt(tpy)<sub>2</sub>(dFbphI- $\kappa^2$ C,C)] (2bc')**. To a suspension of **1b** (100 mg, 0.19 mmol) in MeCN (10 mL) was added 3,7-difluorodibenzo-5-iodolium triflate (88 mg, 0.19 mmol) and the mixture was stirred and irradiated under N<sub>2</sub> with blue light until a pale yellow solution was obtained (2 h).  $\gamma$ -Picoline (55  $\mu$ L, 0.57 mmol) was then added and the solution was stirred at 50 C for 12 h, whereupon a white solid gradually precipitated, which was collected by filtration, washed with MeCN (3  $\times$  2 mL) and vacuum-dried to give **2bc'**. Yield: 64%. <sup>1</sup>H NMR (600 MHz, CD<sub>2</sub>Cl<sub>2</sub>):  $\delta$  8.76 (dd,  $J_{\text{FH}} = 6.0$  Hz,  $J_{\text{HH}} = 8.9$  Hz, 1H), 8.00 (d,  $J_{\text{HH}} = 8.4$  Hz, 1H), 7.97 (d,  $J_{\text{HH}} = 8.2$  Hz, 1H), 7.86-7.80 (m, 3H), 7.71 (d,  $J_{\text{HH}} = 8.0$  Hz, 1H), 7.65 (d,  $J_{\text{FH}} = 8.0$  Hz, 1H), 7.46-7.38 (m, 2H), 7.08-7.02 (m, 2H), 7.01-6.95 (m, 2H), 6.79 (dt,  $J = 8.7, 2.9$  Hz, 1H), 6.58 (s with satellites,  $J_{\text{PtH}} = 26.3$  Hz, 1H), 6.44 (s with satellites,  $J_{\text{PtH}} = 48.6$  Hz, 1H), 6.40 (dd with satellites,  $J_{\text{PtH}} = 57.0$  Hz,  $J_{\text{FH}} = 9.8$ ,  $J_{\text{HH}} = 2.6$  Hz, 1H), 6.11 (d with satellites,  $J_{\text{PtH}} = 23.8$  Hz,  $J_{\text{FH}} = 7.1$  Hz,  $J_{\text{HH}} = 2.6$  Hz, 1H), 2.18 (s, 3H), 2.14 (s, 3H). <sup>19</sup>F NMR (282.4 MHz, CD<sub>2</sub>Cl<sub>2</sub>):  $\delta$  -115.8 (m, 1F), -117.1 (m, 1F). <sup>13</sup>C NMR (151 MHz, CD<sub>2</sub>Cl<sub>2</sub>):  $\delta$  168.2 ( $J_{\text{PtC}} = 545.0$  Hz, C), 166.93 ( $J_{\text{PtC}} = 605.5$  Hz, C), 166.86 (C), 163.1 ( $J_{\text{PtC}} = 49.4$  Hz, C), 161.7 (d,  $J_{\text{CF}} = 245.6$  Hz, C), 160.4 (d,  $J_{\text{CF}} = 255.1$  Hz, C), 148.9 (CH), 147.7 ( $J_{\text{PtC}} = 30.5$  Hz, C), 146.7 ( $J_{\text{PtC}} = 71.6$  Hz, C), 146.2 (C), 145.9 (CH), 143.6 ( $J_{\text{PtC}} = 863.7$  Hz, C), 142.5 ( $J_{\text{PtC}} = 60.9$  Hz, C), 142.1 ( $J_{\text{PtC}} = 38.0$  Hz, C), 141.4 (C), 139.7 (CH), 138.9 (CH), 137.9 (C), 134.9 ( $J_{\text{PtC}} = 37.9$  Hz, CH), 132.5 ( $J_{\text{PtC}} = 56.8$  Hz, CH), 127.5 ( $J_{\text{PtC}} = 51.3$  Hz,  $J_{\text{CF}} = 10.5$  Hz, CH), 125.8 (CH), 125.5 (CH), 125.3 (CH), 125.27 (CH), 125.1 (CH), 123.7 (CH), 123.4 (CH), 120.82 (CH), 120.78 (CH), 119.7 (d,  $J_{\text{PtC}} = 49.3$  Hz,  $J_{\text{CF}} = 19.3$  Hz, CH), 117.3 ( $J_{\text{CF}} = 14.1$  Hz, CH), 109.1 ( $J_{\text{CF}} = 20.3$  Hz, CH), 89.9 ( $J_{\text{PtC}} = 45.7$  Hz,  $J_{\text{CF}} = 5.3$  Hz, C), 22.2 (CH<sub>3</sub>), 22.1 (CH<sub>3</sub>). Elemental analysis calcd (%) for  $\text{C}_{36}\text{H}_{25}\text{F}_2\text{IN}_2\text{Pt}$ : C 51.14, H 2.98, N 3.31; found: C 50.99, H 3.25, N 3.42.

**[Pt(tpy)<sub>2</sub>(dFbphI- $\kappa^2$ C,I)]OTf (3bc)**. To a suspension of **1b** (50 mg, 0.09 mmol) in MeCN (10 mL) was added 3,7-difluorodibenzo-5-iodolium triflate (44 mg, 0.09 mmol) and the suspension was irradiated with blue light until a pale yellow solution was obtained (4 h). The solvent was evaporated under reduced pressure and the residue was treated with CH<sub>2</sub>Cl<sub>2</sub> (1 mL) and Et<sub>2</sub>O (5 mL) to give a pale brown precipitate, which was separated by filtration. The filtrate was evaporated under reduced pressure and

the residue was treated with  $\text{CH}_2\text{Cl}_2$  (1 mL) and pentane (20 mL) to give a pale yellow precipitate, which was collected by filtration and vacuum-dried to give **3bc**. Yield: 50%.  $^1\text{H}$  NMR (600 MHz,  $\text{CD}_2\text{Cl}_2$ ):  $\delta$  9.25 (d,  $J_{\text{HH}} = 5.3$  Hz, 1H), 8.30 (d,  $J_{\text{HH}} = 8.2$  Hz, 1H), 8.25 (dt,  $J_{\text{HH}} = 7.8, 1.5$  Hz, 1H), 7.91 (d,  $J_{\text{HH}} = 8.0$  Hz, 1H), 7.86 (dt,  $J = 7.3, 1.5$  Hz, 1H), 7.78 (d with satellites,  $J_{\text{PtH}} = 22.5, J_{\text{HH}} = 7.8$  Hz, 1H), 7.62-7.56 (m, 2H), 7.50 (d,  $J_{\text{HH}} = 8.0$  Hz, 1H), 7.40 (d,  $J_{\text{PtH}} = 10.7$  Hz,  $J_{\text{HH}} = 5.2$  Hz, 1H), 7.35-7.30 (m, 1H), 7.22 (dt,  $J = 8.3, 2.7$  Hz, 1H), 7.13-7.10 (m, 1H), 7.09 (dd,  $J_{\text{FH}} = 7.3, J_{\text{HH}} = 2.7$  Hz, 1H), 7.05 (d,  $J_{\text{HH}} = 7.7$  Hz, 1H), 6.93 (d,  $J_{\text{HH}} = 7.9$  Hz, 1H), 6.89 (m, 1H), 6.64 (s with satellites,  $J_{\text{PtH}} = 40.2$  Hz, 1H), 6.27 (s with satellites,  $J_{\text{PtH}} = 64.8$  Hz, 1H), 6.14 (dd with satellites,  $J_{\text{PtH}} = 60.0$  Hz,  $J_{\text{FH}} = 10.9, J_{\text{HH}} = 2.7$  Hz, 1H), 2.09 (s, 3H), 2.02 (s, 3H).  $^{19}\text{F}$  NMR (282.4 MHz,  $\text{CD}_2\text{Cl}_2$ ):  $\delta$  -78.9 (s, 3F), -114.5 (m, 1F), -115.8 (m, 1F).  $^{13}\text{C}$  NMR (151 MHz,  $\text{CD}_2\text{Cl}_2$ ):  $\delta$  162.9 (C), 161.7 ( $J_{\text{PtC}} = 150.8$  Hz, C), 161.2 ( $J_{\text{PtC}} = 251.0$  Hz, C), 160.4 ( $J_{\text{PtC}} = 61.8$  Hz, C), 160 (C), 159.3 ( $J_{\text{PtC}} = 47.7$  Hz, C), 152.8 (CH), 149.1 (CH), 146.6 (C), 146.1 ( $J_{\text{PtC}} = 28.1$  Hz, C), 143 (C), 142.7 (C), 141.8 (C), 141.5 (CH), 141.0 (CH), 140.9 (C), 139.0 (C), 136.4 (C), 135.9 ( $J_{\text{PtC}} = 42.2$  Hz, CH), 135.3 (CH), 135.2 (CH), 133.7 (CH), 133.6 (CH), 132.2 ( $J_{\text{PtC}} = 59.3$  Hz, CH), 128.5 (CH), 127.4 (CH), 126.9 (CH), 124.8 (CH), 122.8 (CH), 122.1 (CH), 121.9 (CH), 120.9 (CH), 117.9 (CH), 113.9 (CH), 101.3 (C), 22.2 ( $\text{CH}_3$ ), 22.1 ( $\text{CH}_3$ ). Elemental analysis calcd (%) for  $\text{C}_{37}\text{H}_{27}\text{F}_5\text{IN}_2\text{O}_3\text{PtS}$ : C 44.63, H 2.63, N 2.81, S 3.22; found: C 44.92, H 2.68, N 2.81, S 3.02.

#### 1.4. X-ray structure determinations

Single crystals of **2ba**·0.5CH<sub>2</sub>Cl<sub>2</sub>, **2bc'**, and **3bc**·Et<sub>2</sub>O suitable for X-ray diffraction were obtained by slow diffusion of Et<sub>2</sub>O into solutions of the complexes in CH<sub>2</sub>Cl<sub>2</sub>. The data were collected on a Bruker D8 QUEST diffractometer with monochromated Mo-*K*α radiation performing  $\varphi$  and  $\omega$  scans. The structures were solved by direct methods and refined anisotropically on  $F^2$  using the program SHELXL-2018 (G. M. Sheldrick, University of Göttingen).<sup>5,6</sup> Numerical details are given in Table S1. Methyl hydrogens were included as part of rigid idealized methyl groups allowed to rotate but not tip; other hydrogens were included using a riding model. *Special features of refinement:* In the case of **2ba**·0.5CH<sub>2</sub>Cl<sub>2</sub>, there are two independent molecules of the complex and one resolved CH<sub>2</sub>Cl<sub>2</sub> molecule in the asymmetric unit; additionally, there is a poorly-resolved region of residual electron density that could not be adequately modelled and was "removed" using the program SQUEEZE,<sup>7</sup> which is part of the PLATON system; the void volume per cell was 325 Å<sup>3</sup>, with a void electron count per cell of 9; this additional solvent was not taken into account when calculating derived parameters such as the formula weight, because its nature was uncertain.

**Table S1.** Crystallographic data for **2ba**·0.5CH<sub>2</sub>Cl<sub>2</sub>, **2bc'** and **3bc**·Et<sub>2</sub>O.

|                                             | <b>2ba</b> ·0.5CH <sub>2</sub> Cl <sub>2</sub>        | <b>2bc'</b>                                                       | <b>3bc</b> ·Et <sub>2</sub> O                                                     |
|---------------------------------------------|-------------------------------------------------------|-------------------------------------------------------------------|-----------------------------------------------------------------------------------|
| formula                                     | C <sub>44.5</sub> H <sub>45</sub> ClN <sub>2</sub> Pt | C <sub>36</sub> H <sub>25</sub> F <sub>2</sub> IN <sub>2</sub> Pt | C <sub>41</sub> H <sub>36</sub> F <sub>5</sub> IN <sub>2</sub> O <sub>4</sub> PtS |
| fw                                          | 838.36                                                | 845.57                                                            | 1069.77                                                                           |
| <i>T</i> (K)                                | 100(2)                                                | 100(2)                                                            | 100(2)                                                                            |
| $\lambda$ (Å)                               | 0.71073                                               | 0.71073                                                           | 0.71073                                                                           |
| cryst syst                                  | Monoclinic                                            | Orthorhombic                                                      | Monoclinic                                                                        |
| space group                                 | P2 <sub>1</sub> /n                                    | Pbca                                                              | P2 <sub>1</sub> /c                                                                |
| <i>a</i> (Å)                                | 10.9752(8) Å                                          | 17.1359(10)                                                       | 16.2963(10)                                                                       |
| <i>b</i> (Å)                                | 29.683(2) Å                                           | 18.0068(10)                                                       | 21.4916(13)                                                                       |
| <i>c</i> (Å)                                | 23.6145(16) Å                                         | 18.8414(11)                                                       | 11.4378(7)                                                                        |
| $\alpha$ (°)                                | 90                                                    | 90                                                                | 90                                                                                |
| $\beta$ (°)                                 | 91.371(2)                                             | 90                                                                | 101.459(2)                                                                        |
| $\gamma$ (°)                                | 90                                                    | 90                                                                | 90                                                                                |
| <i>V</i> (Å <sup>3</sup> )                  | 7690.8(10)                                            | 5813.8(6)                                                         | 3926.1(4)                                                                         |
| <i>Z</i>                                    | 8                                                     | 8                                                                 | 4                                                                                 |
| $\rho_{\text{calcd}}$ (Mg m <sup>-3</sup> ) | 1.448                                                 | 1.932                                                             | 1.810                                                                             |
| $\mu$ (mm <sup>-1</sup> )                   | 3.751                                                 | 5.931                                                             | 4.481                                                                             |
| R1 <sup>a</sup>                             | 0.0268                                                | 0.0179                                                            | 0.0355                                                                            |
| wR2 <sup>b</sup>                            | 0.0593                                                | 0.0395                                                            | 0.0817                                                                            |

<sup>a</sup>R1 =  $\Sigma||F_o| - |F_c|| / \Sigma|F_o|$  for reflections with  $I > 2\sigma(I)$ . <sup>b</sup>wR2 =  $[\Sigma[w(F_o^2 - F_c^2)^2] / \Sigma[w(F_o^2)^2]]^{0.5}$  for all reflections;  $w^{-1} = \sigma^2(F^2) + (aP)^2 + bP$ , where  $P = (2F_c^2 + F_o^2)/3$  and *a* and *b* are constants set by the program.

## 1.5. Photophysical characterization

Electronic absorption spectra were registered with a Perkin-Elmer Lambda 750S spectrophotometer. Excitation and emission spectra were recorded on a Jobin Yvon Fluorolog 3-22 spectrofluorometer with a 450 W xenon lamp, double-grating monochromators, and a TBX-04 photomultiplier. Measurements in solution were performed using 10 mm quartz fluorescence cells (298 K) or 5 mm quartz NMR tubes (77 K). A liquid nitrogen Dewar with quartz windows was employed for measurements at 77 K. Emission data in PMMA matrices were registered using quartz slides as sample holders. Emission lifetimes were measured using an IBH FluoroHub controller in MCS mode and the Fluorolog's FL-1040 phosphorimeter pulsed xenon lamp as excitation source; the estimated uncertainty is  $\pm 10\%$  or better. Emission quantum yields ( $\Phi$ ) were measured using a Hamamatsu C11347 Absolute PL Quantum Yield Spectrometer; the estimated uncertainty is  $\pm 5\%$  or better. All emission data were registered under rigorous exclusion of oxygen.

## 1.6. Computational methods

DFT calculations were carried out with the Gaussian 09 package,<sup>8</sup> using the hybrid B3LYP functional<sup>9,10</sup> and the 6-31G\*\*<sup>11,12</sup> basis set for the light atoms, and the LANL2DZ<sup>13</sup> basis set and effective core potential for the Pt atom. Geometry optimizations were performed using "tight" convergence criteria and "ultrafine" integration grid. No symmetry restrictions were applied. Vertical excitation energies at the ground-state geometries were obtained from TDDFT calculations. Triplet-state geometries were optimized through spin-unrestricted DFT (UB3LYP), following a previously described methodology.<sup>14</sup> The solvent effect (CH<sub>2</sub>Cl<sub>2</sub>) was accounted for in all cases by using the integral equation formalism variant of the polarizable continuum solvation model (IEFPCM).<sup>15</sup> Frequency calculations were performed in all cases to confirm the optimized geometries as minima on the potential energy surface (zero imaginary frequencies). Natural spin densities were calculated using the NBO 5.9 program.<sup>16</sup>



## 2. NMR spectra of new compounds

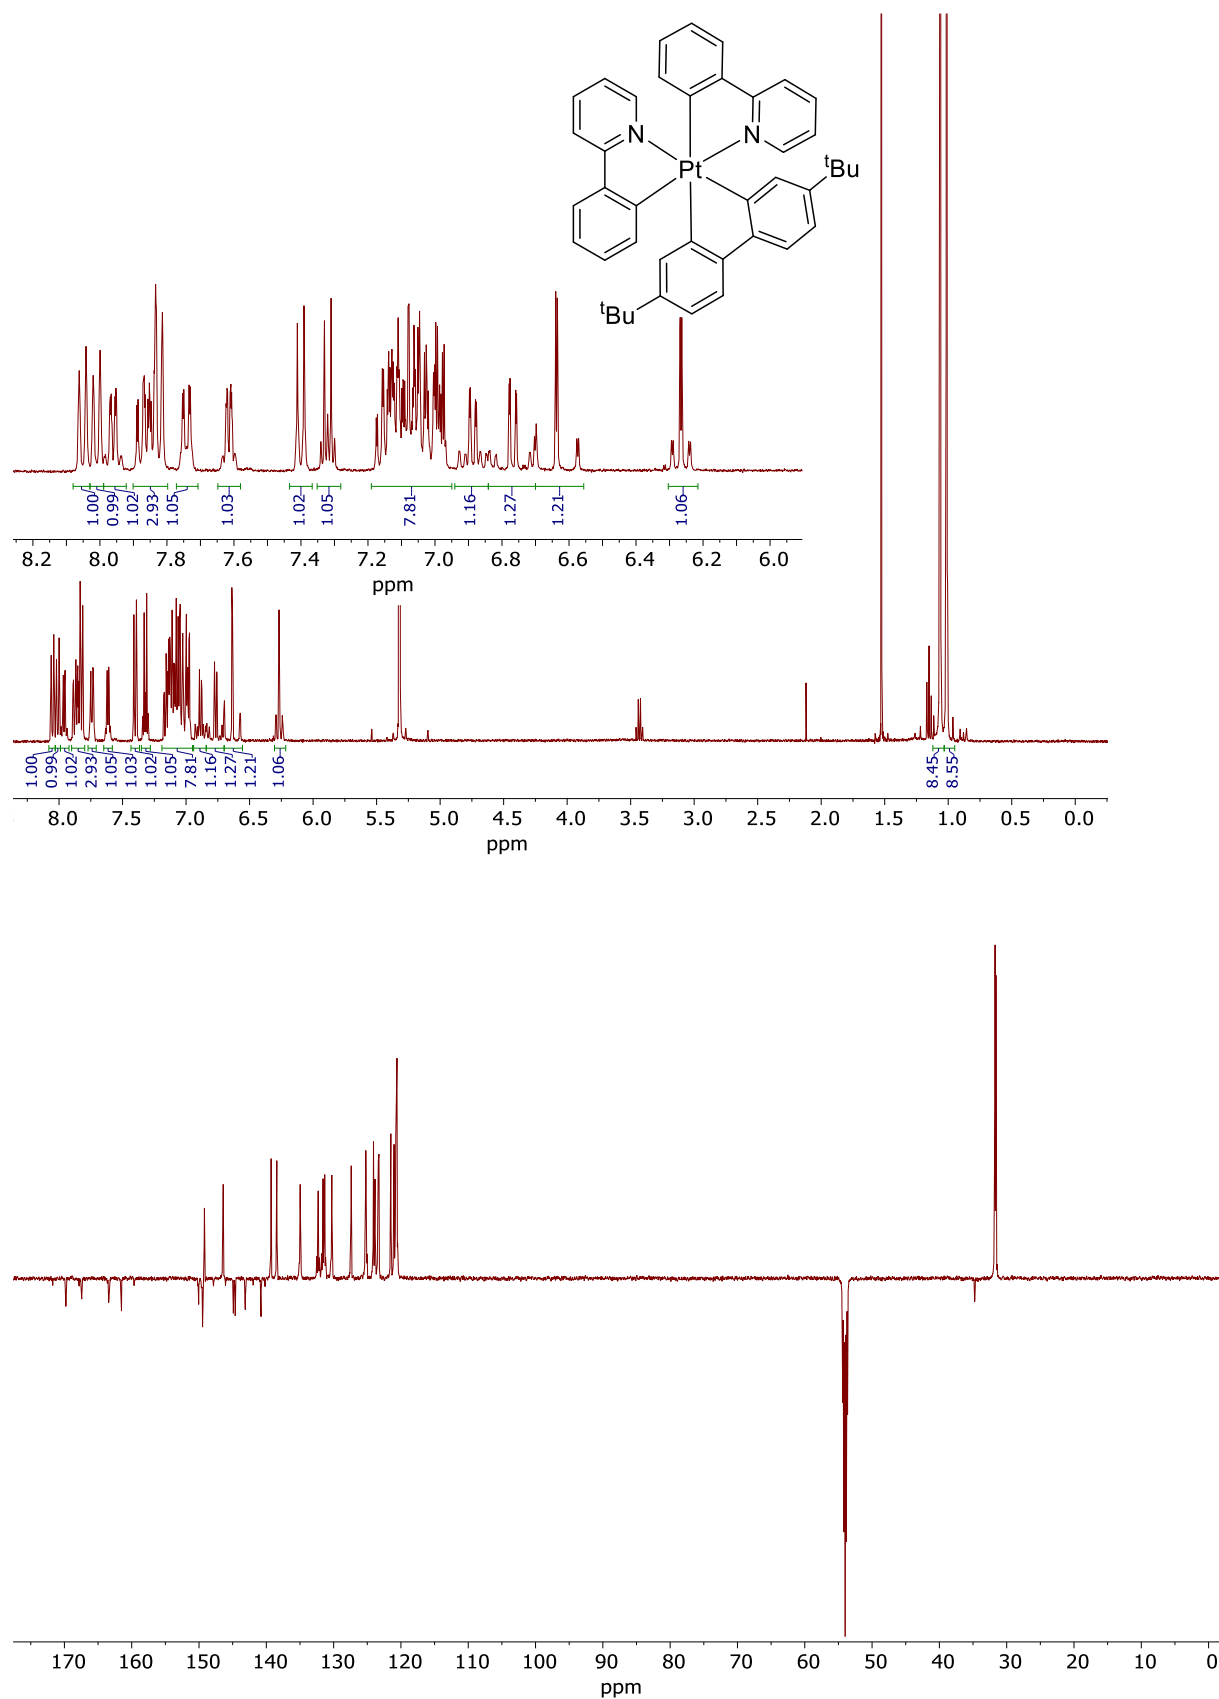

**Figure S1.**  $^1\text{H}$  (top) and  $^{13}\text{C}\{^1\text{H}\}$  APT (bottom) NMR spectra of complex **2aa** ( $\text{CD}_2\text{Cl}_2$ , 400 and 151 MHz, respectively).

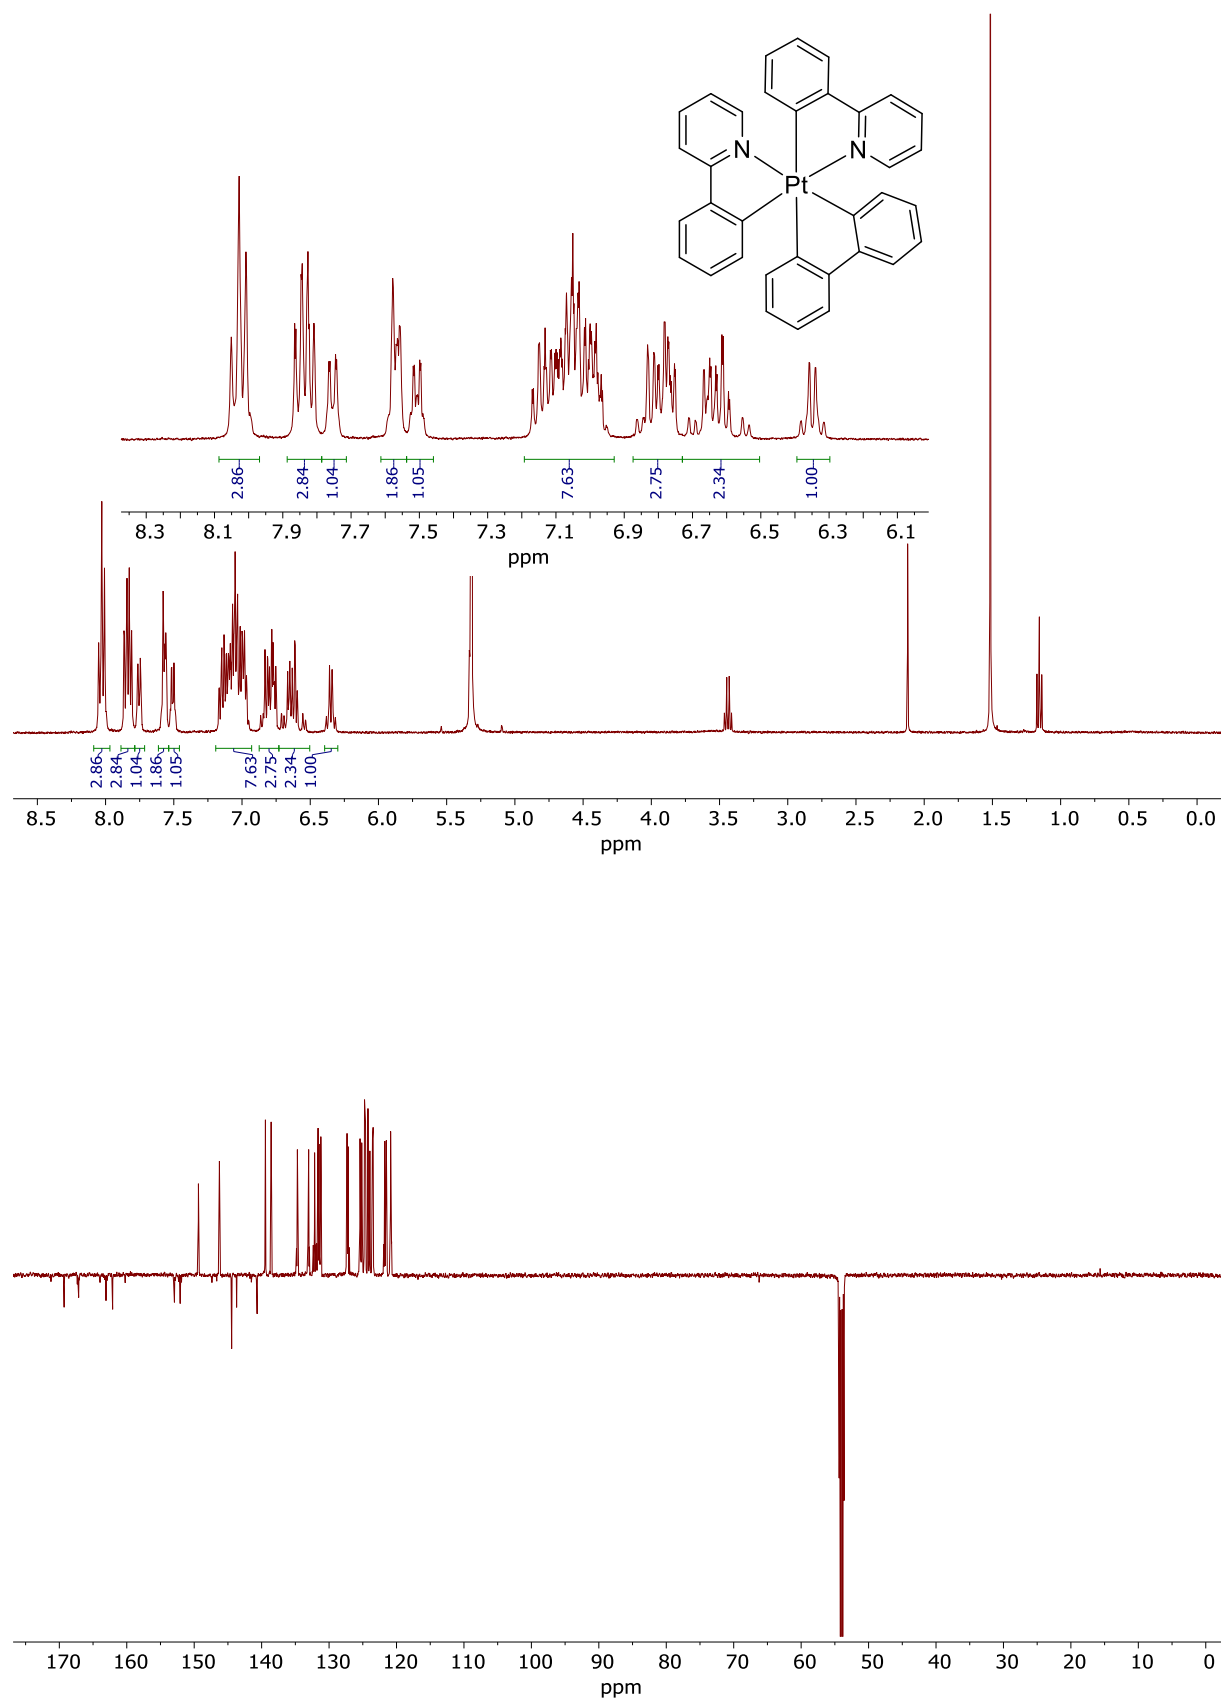

**Figure S2.** <sup>1</sup>H (top) and <sup>13</sup>C{<sup>1</sup>H} APT (bottom) NMR spectra of complex **2ab** (CD<sub>2</sub>Cl<sub>2</sub>, 400 and 151 MHz, respectively).

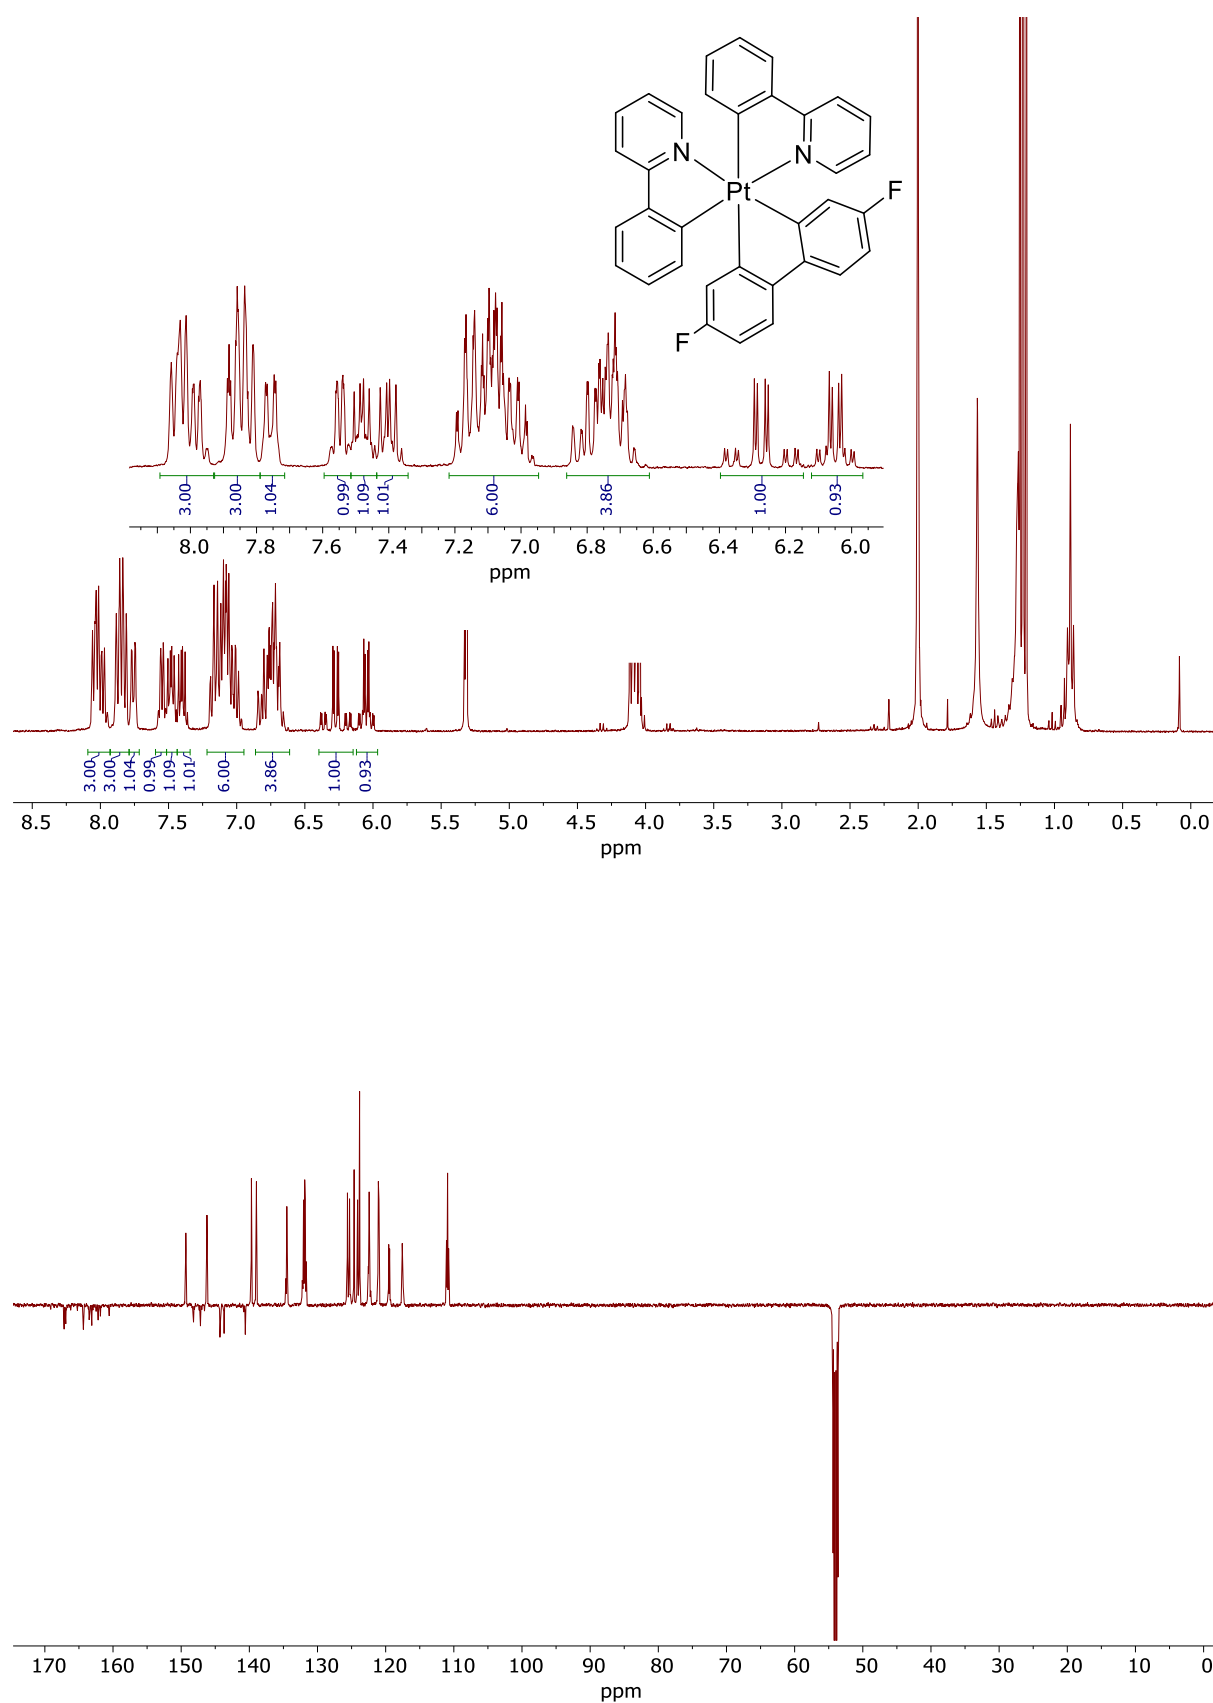

**Figure S3.**  $^1\text{H}$  (top) and  $^{13}\text{C}\{^1\text{H}\}$  APT (bottom) NMR spectra of complex **2ac** ( $\text{CD}_2\text{Cl}_2$ , 400 and 151 MHz, respectively).

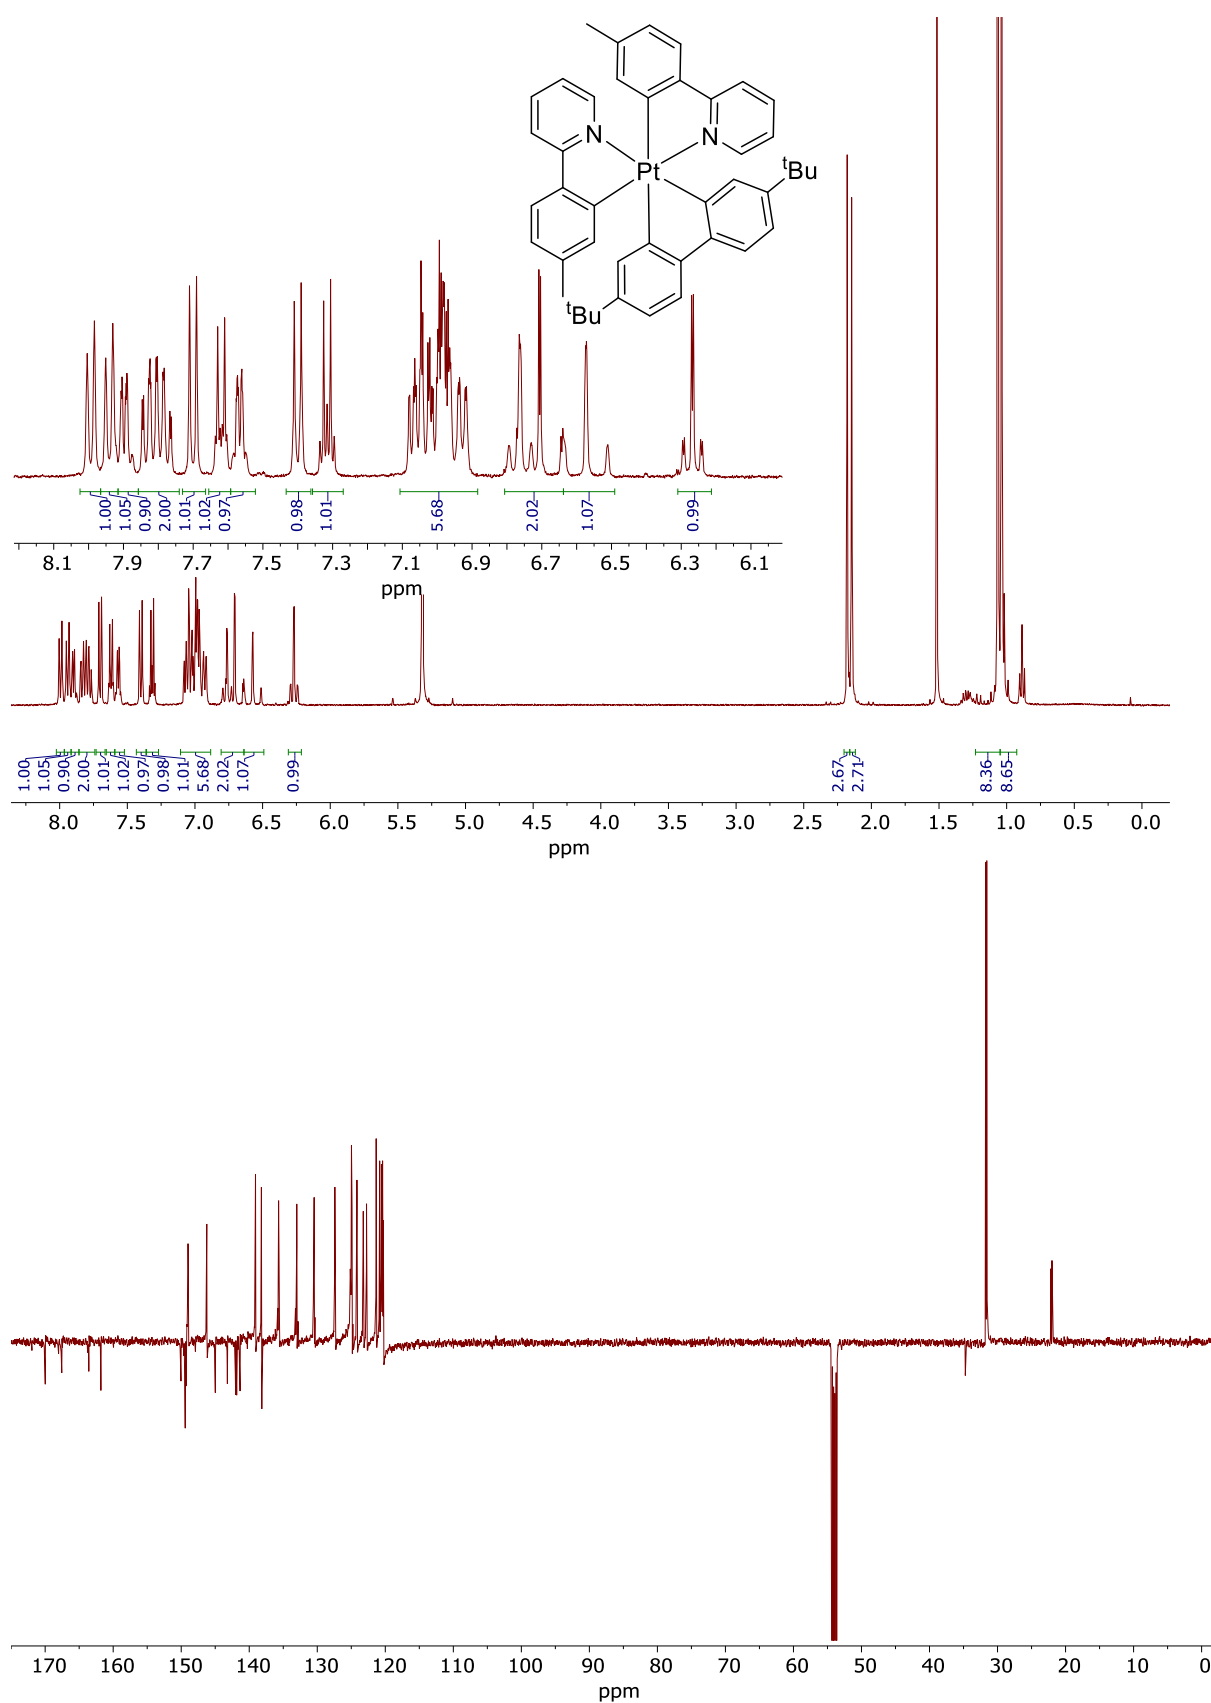

**Figure S4.**  $^1\text{H}$  (top) and  $^{13}\text{C}\{^1\text{H}\}$  APT (bottom) NMR spectra of complex **2ba** ( $\text{CD}_2\text{Cl}_2$ , 400 and 151 MHz, respectively).

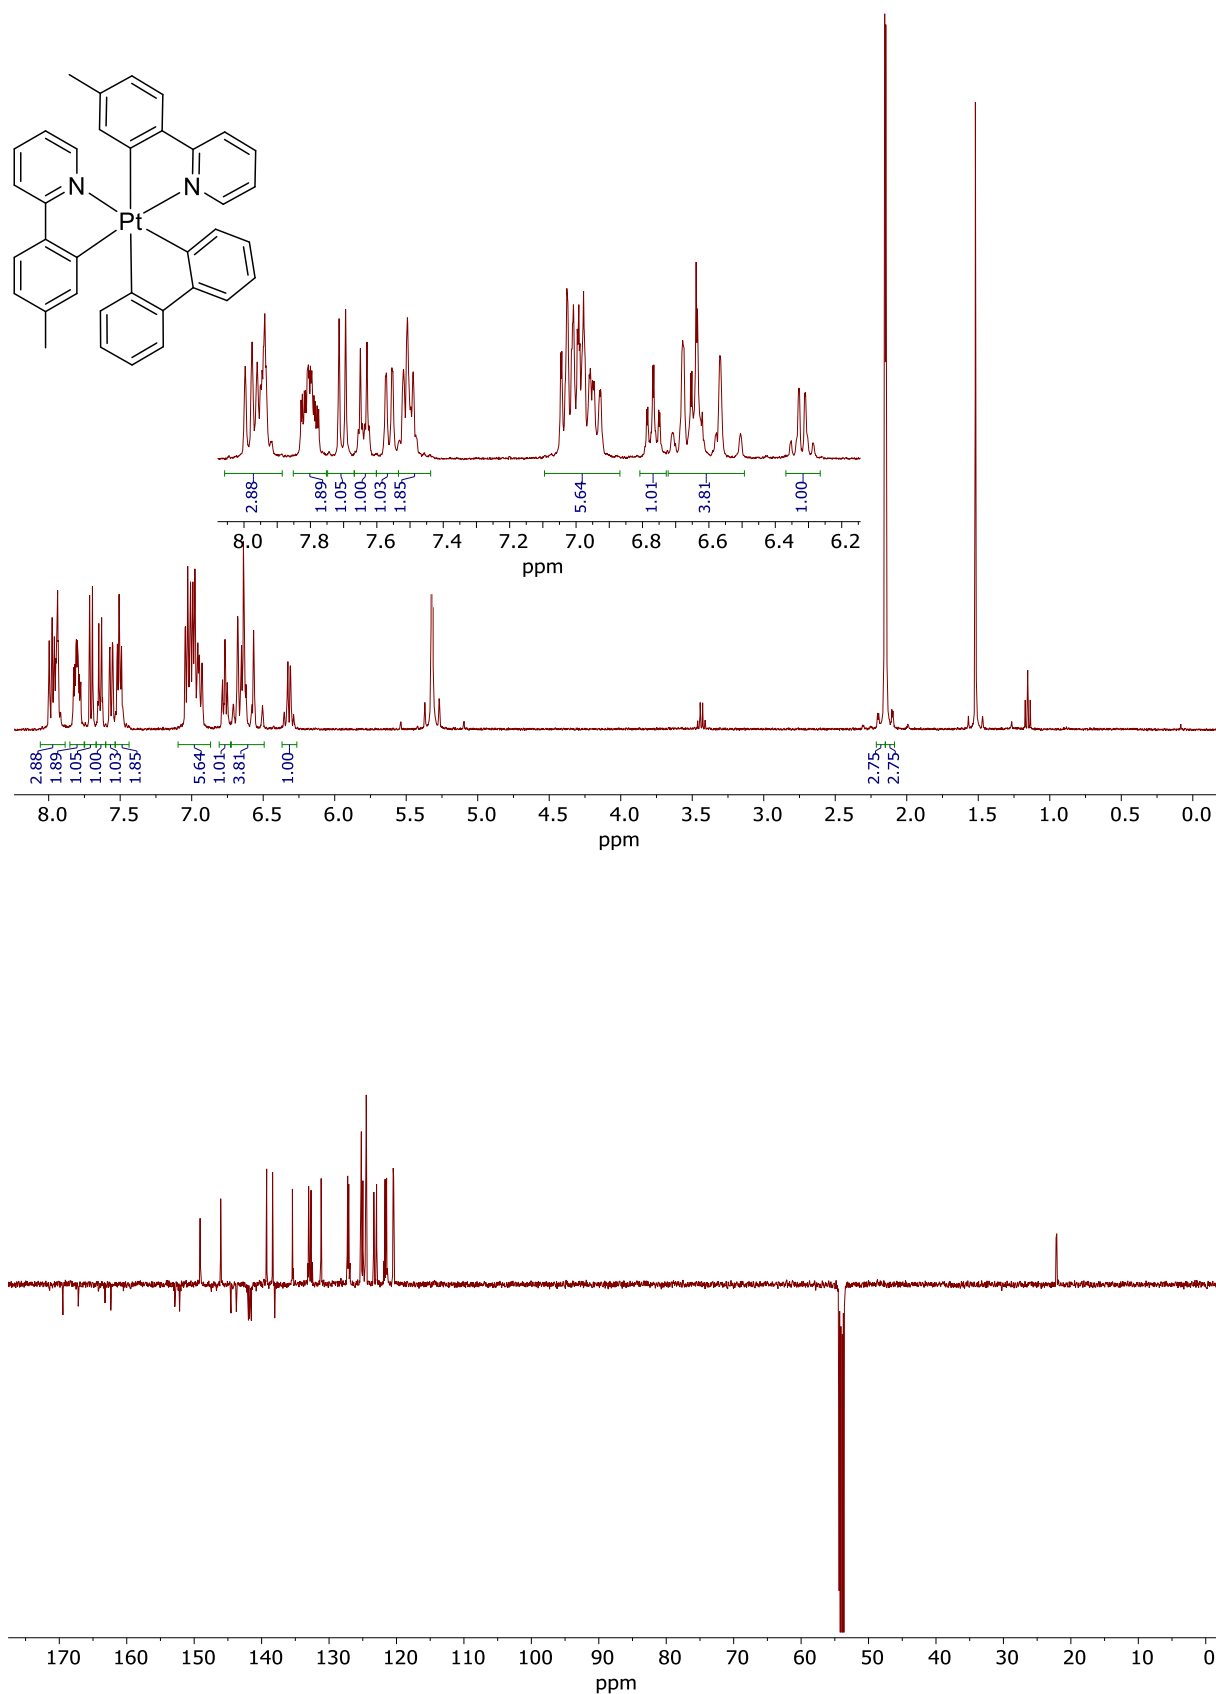

**Figure S5.**  $^1\text{H}$  (top) and  $^{13}\text{C}\{^1\text{H}\}$  APT (bottom) NMR spectra of complex **2bb** ( $\text{CD}_2\text{Cl}_2$ , 400 and 151 MHz, respectively).

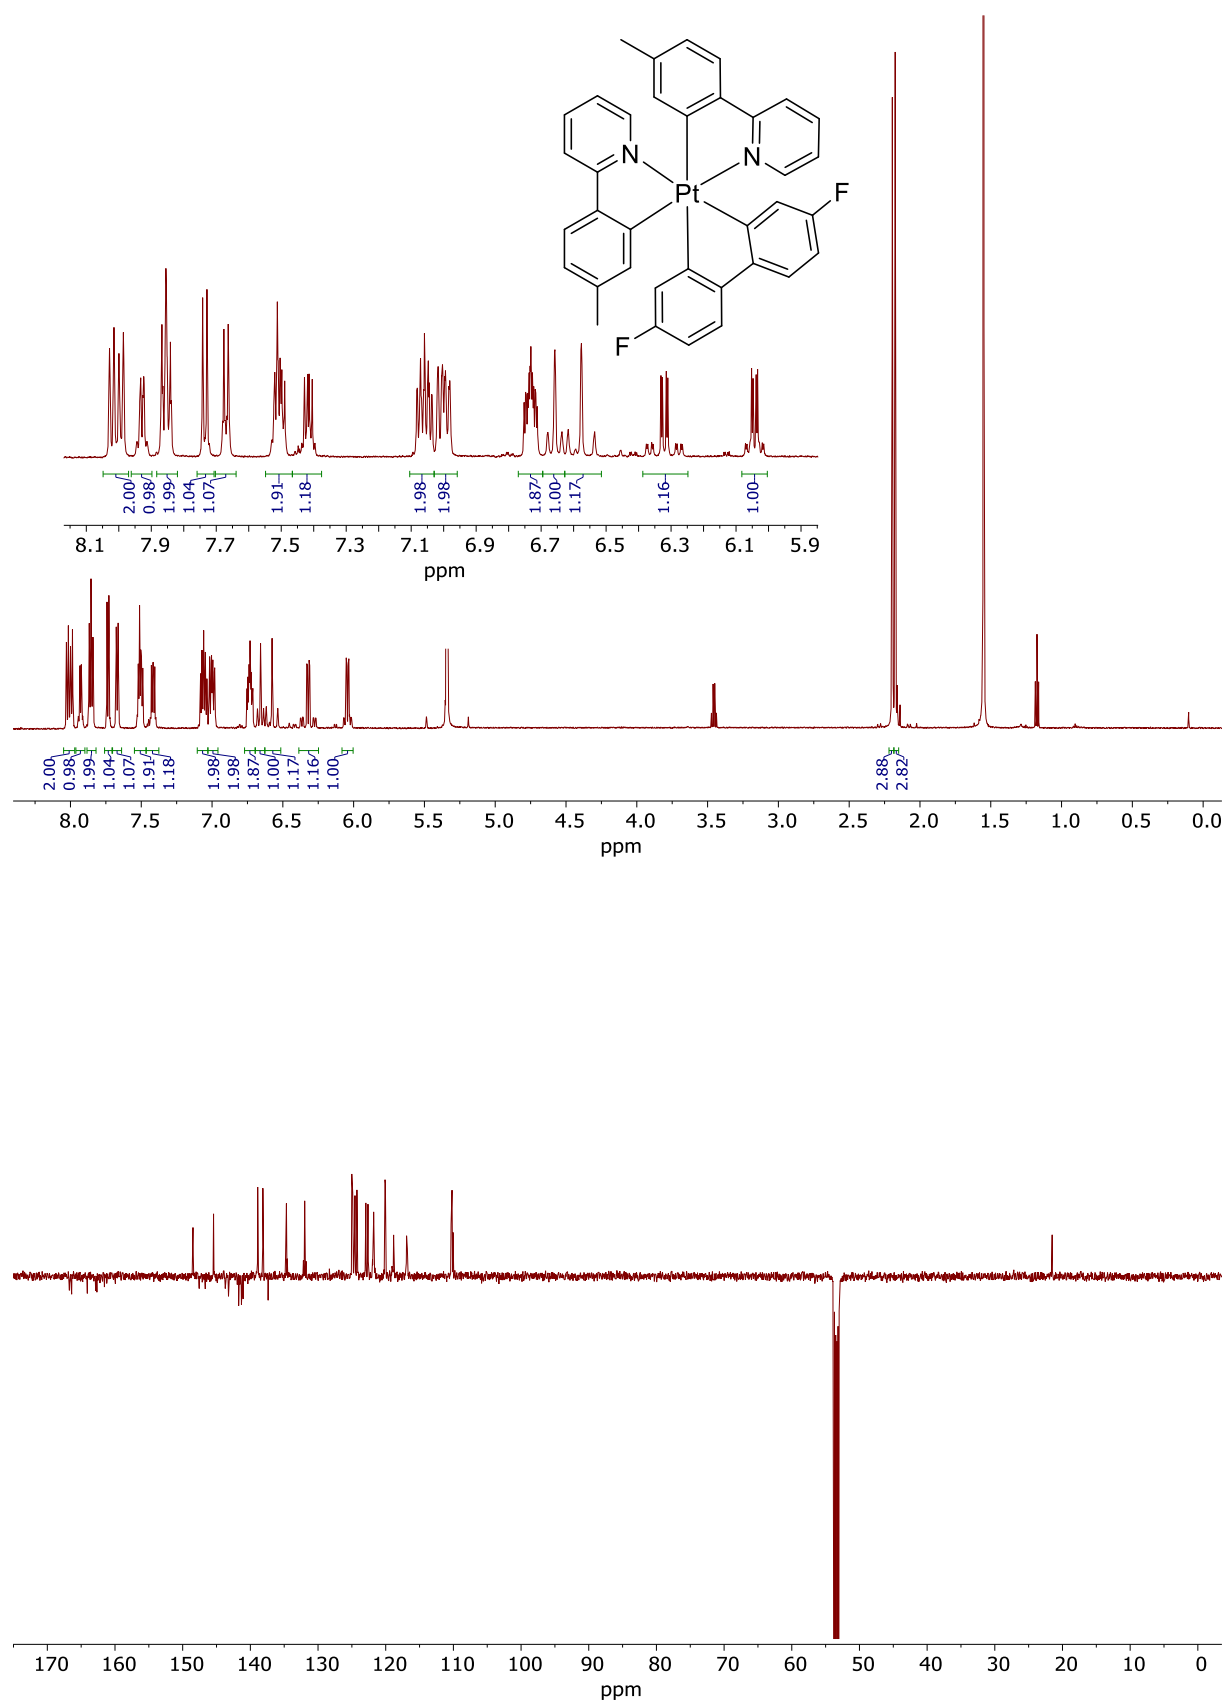

**Figure S6.**  $^1\text{H}$  (top) and  $^{13}\text{C}\{^1\text{H}\}$  APT (bottom) NMR spectra of complex **2bc** ( $\text{CD}_2\text{Cl}_2$ , 600 and 151 MHz, respectively).

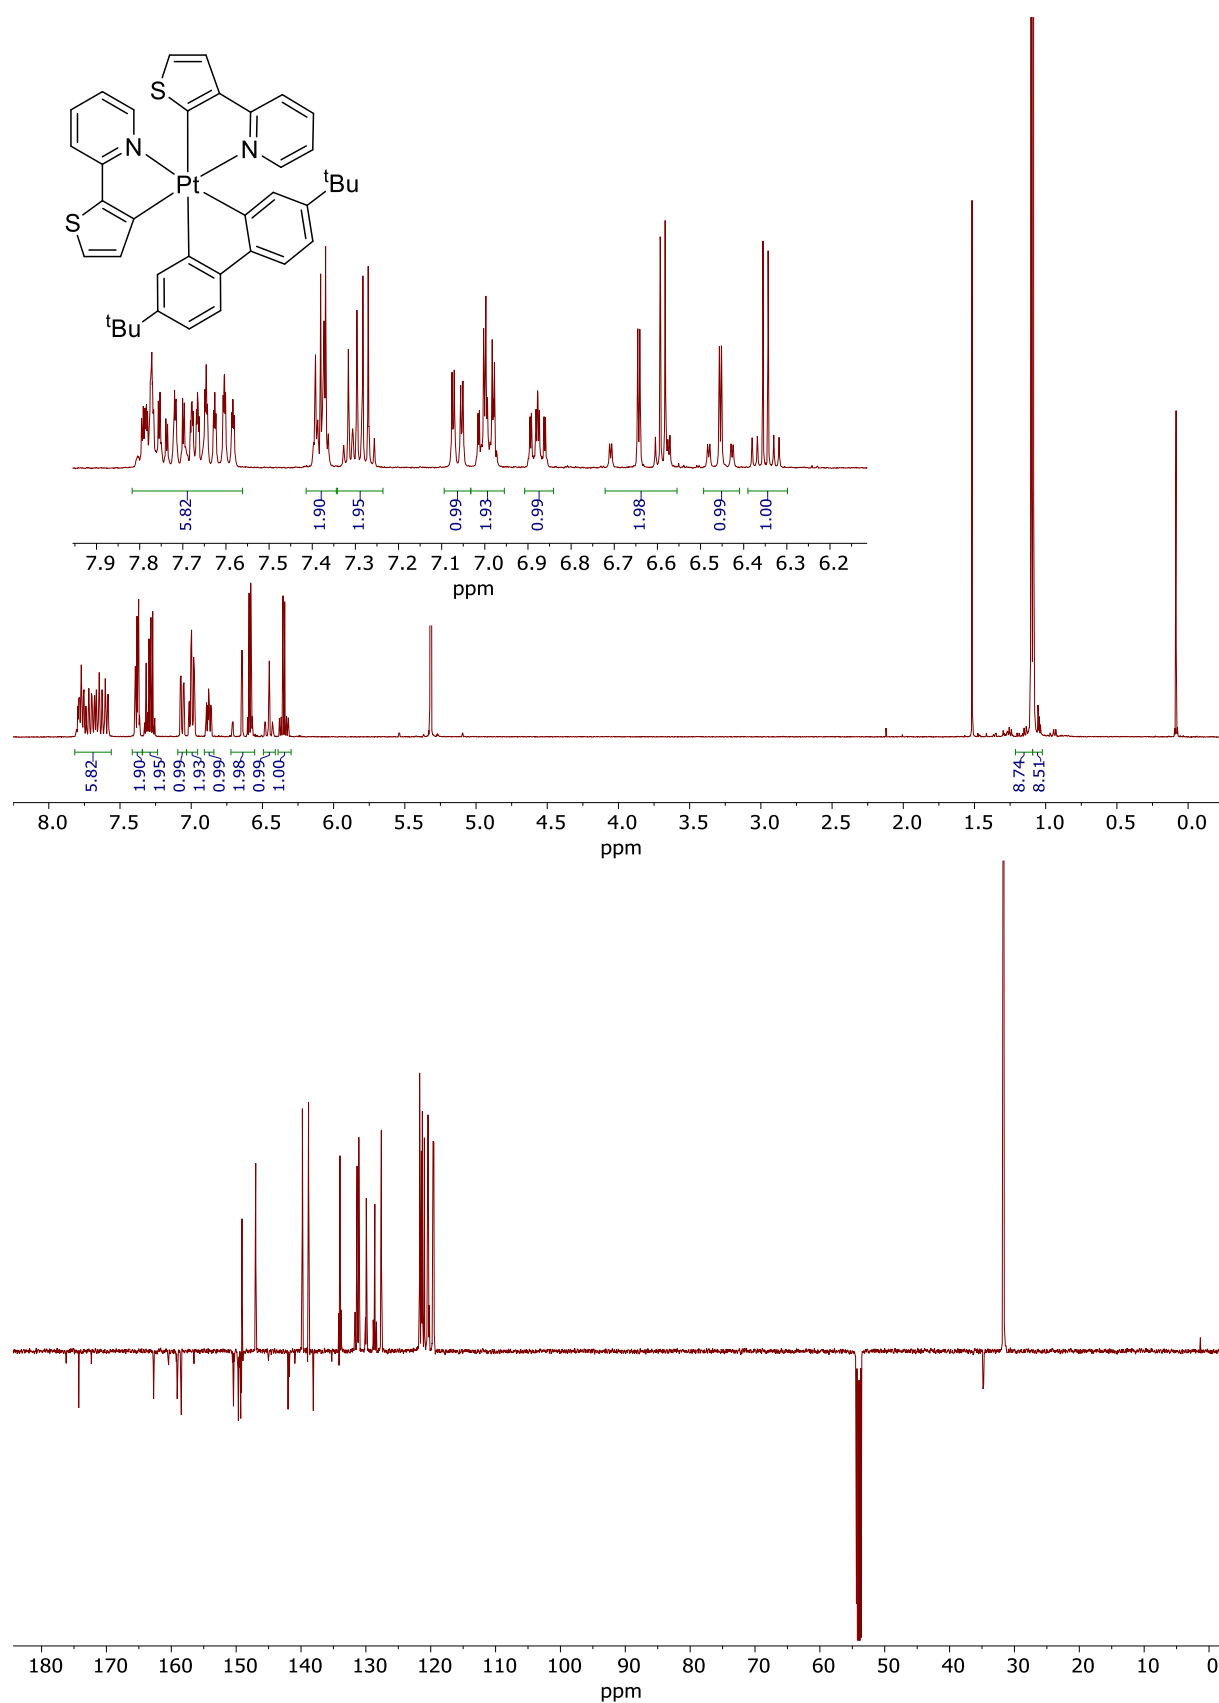

**Figure S7.**  $^1\text{H}$  (top) and  $^{13}\text{C}\{^1\text{H}\}$  APT (bottom) NMR spectra of complex **2ca** ( $\text{CD}_2\text{Cl}_2$ , 400 and 151 MHz, respectively).

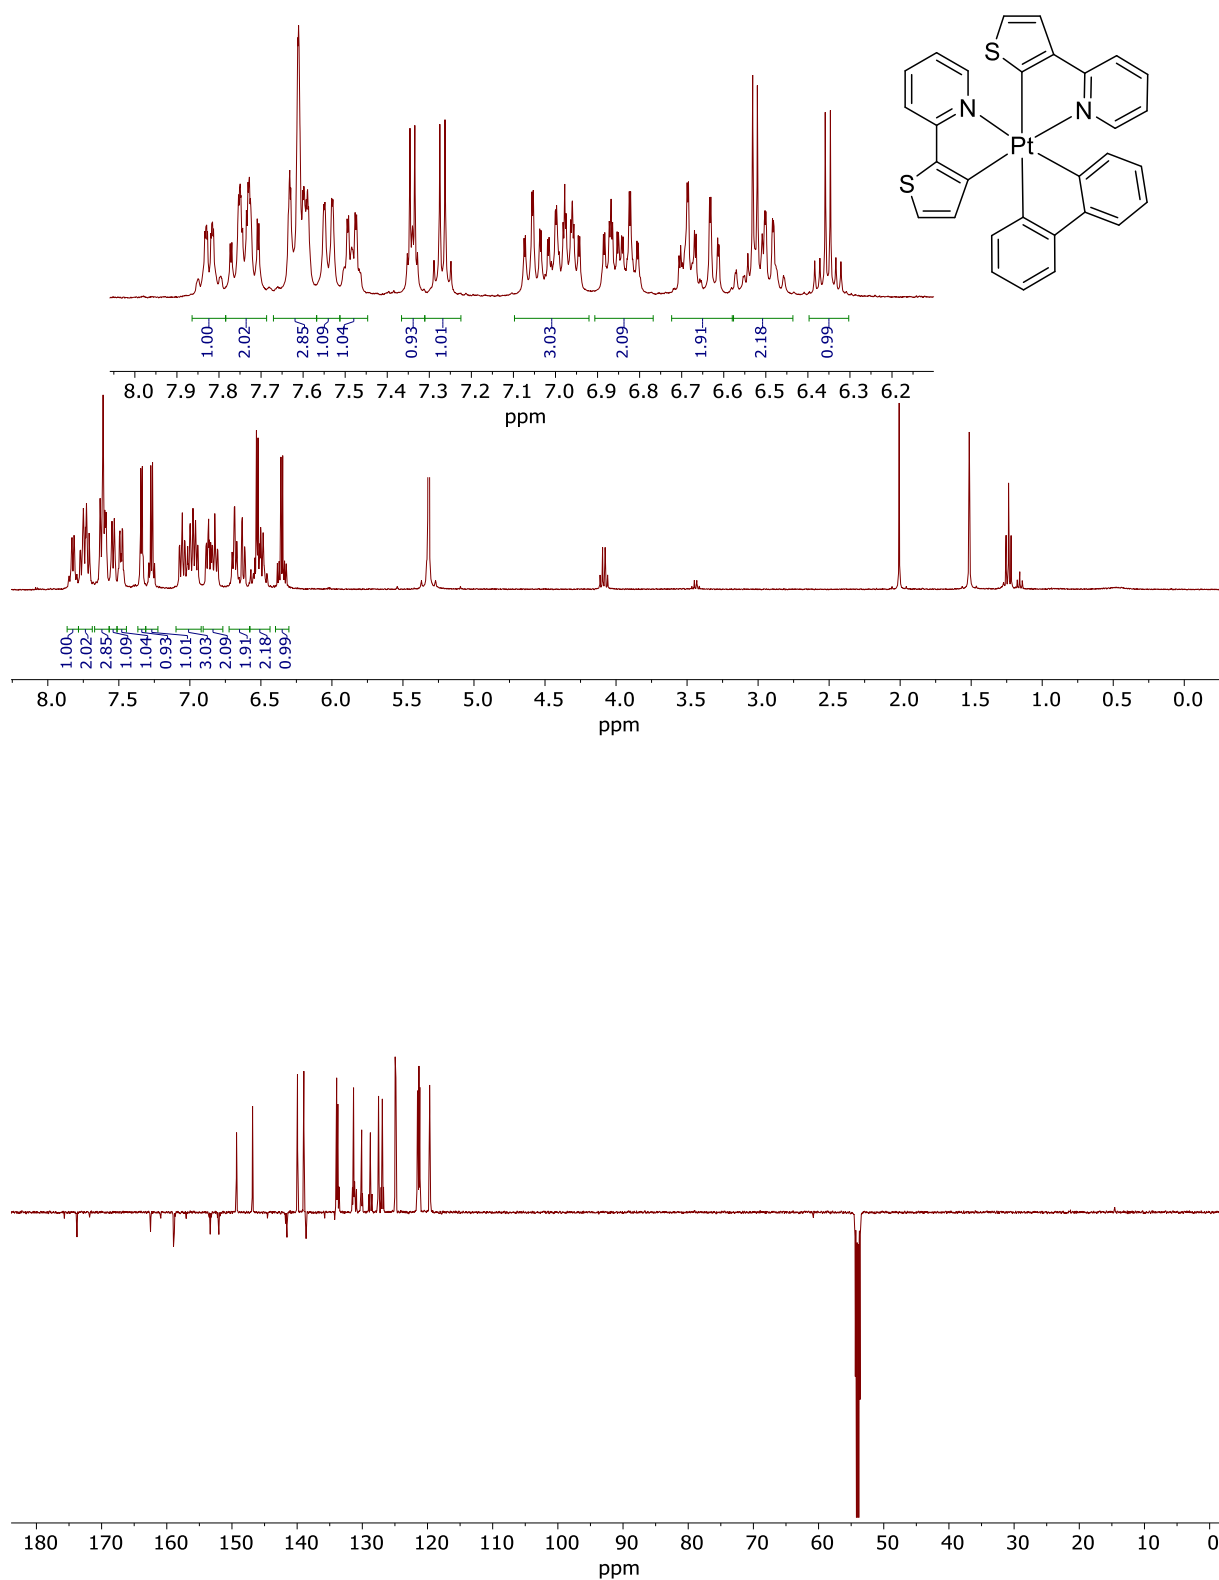

**Figure S8.**  $^1\text{H}$  (top) and  $^{13}\text{C}\{^1\text{H}\}$  APT (bottom) NMR spectra of complex **2cb** ( $\text{CD}_2\text{Cl}_2$ , 400 and 151 MHz, respectively).



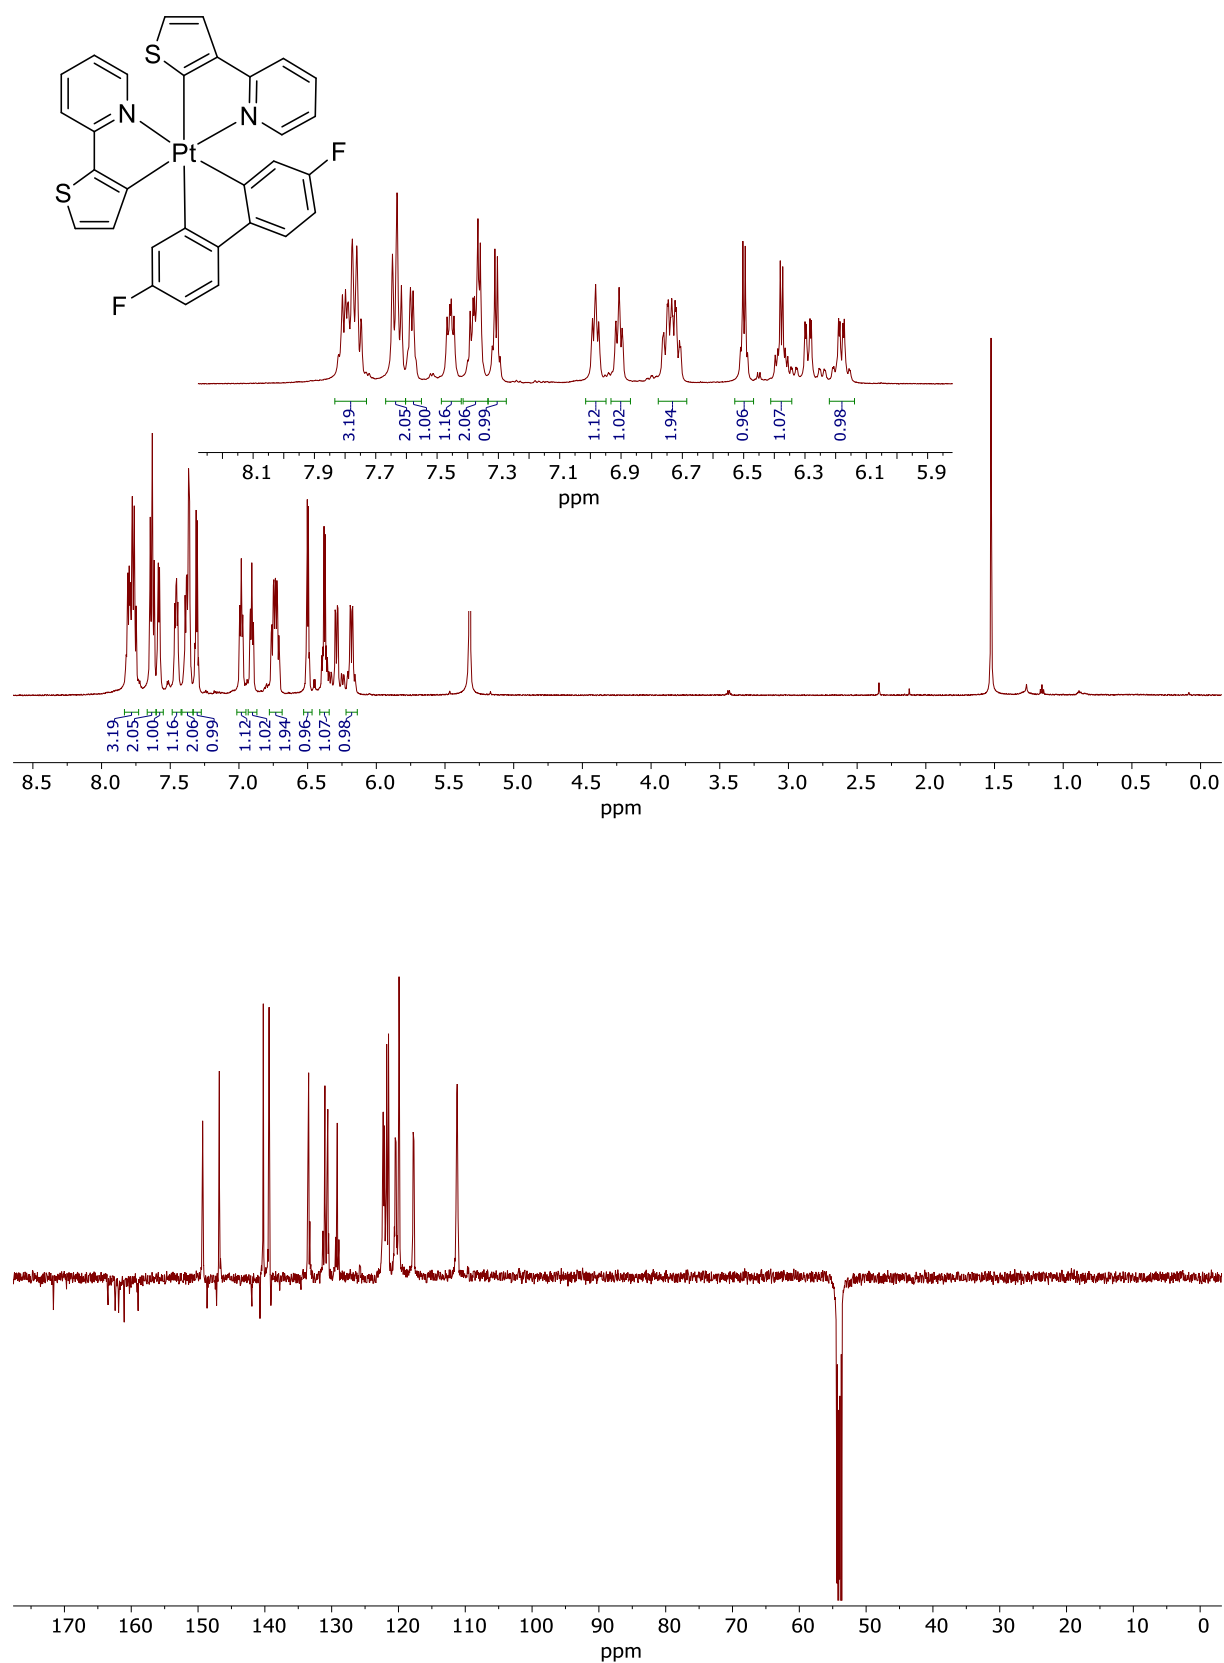

**Figure S9.**  $^1\text{H}$  (top) and  $^{13}\text{C}\{^1\text{H}\}$  APT (bottom) NMR spectra of complex **2cc** ( $\text{CD}_2\text{Cl}_2$ , 400 and 151 MHz, respectively).

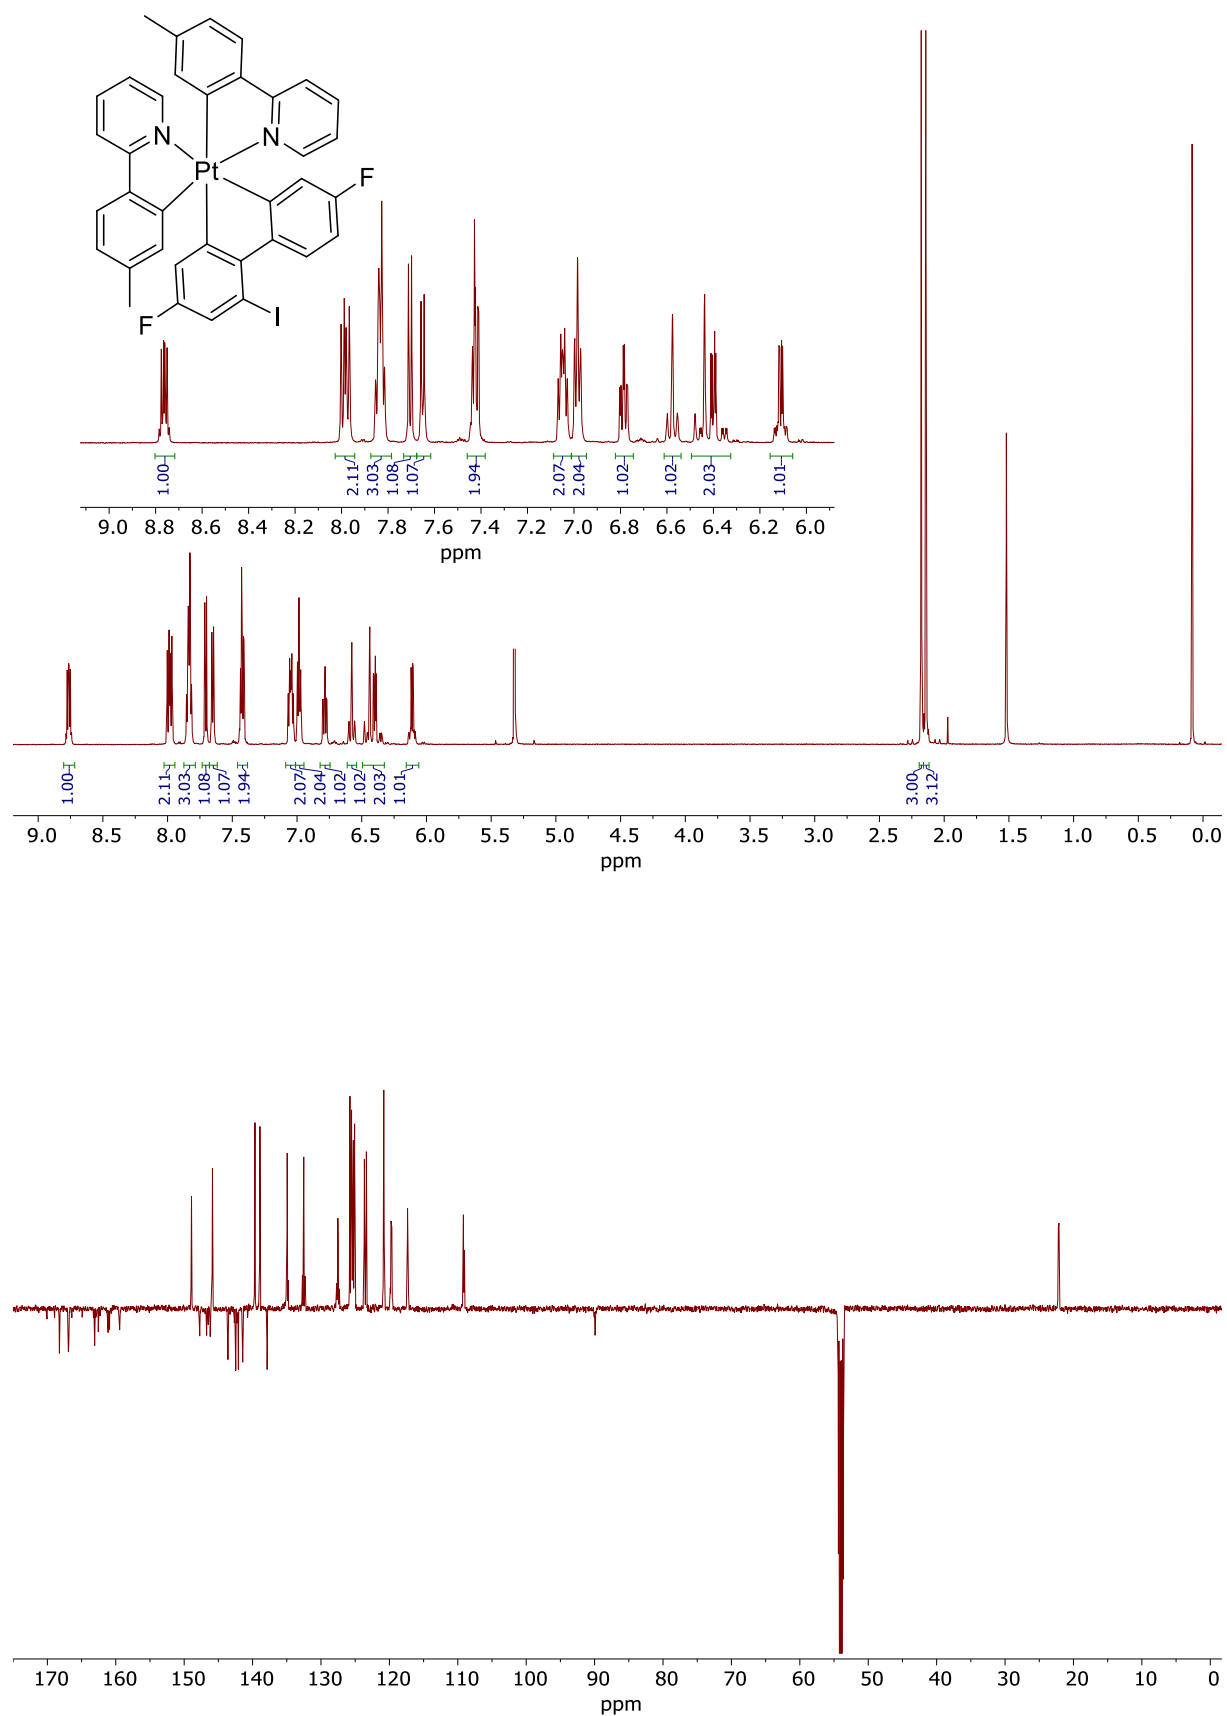

**Figure S10.**  $^1\text{H}$  (top) and  $^{13}\text{C}\{^1\text{H}\}$  APT (bottom) NMR spectra of complex **2bc'** ( $\text{CD}_2\text{Cl}_2$ , 400 and 151 MHz, respectively).

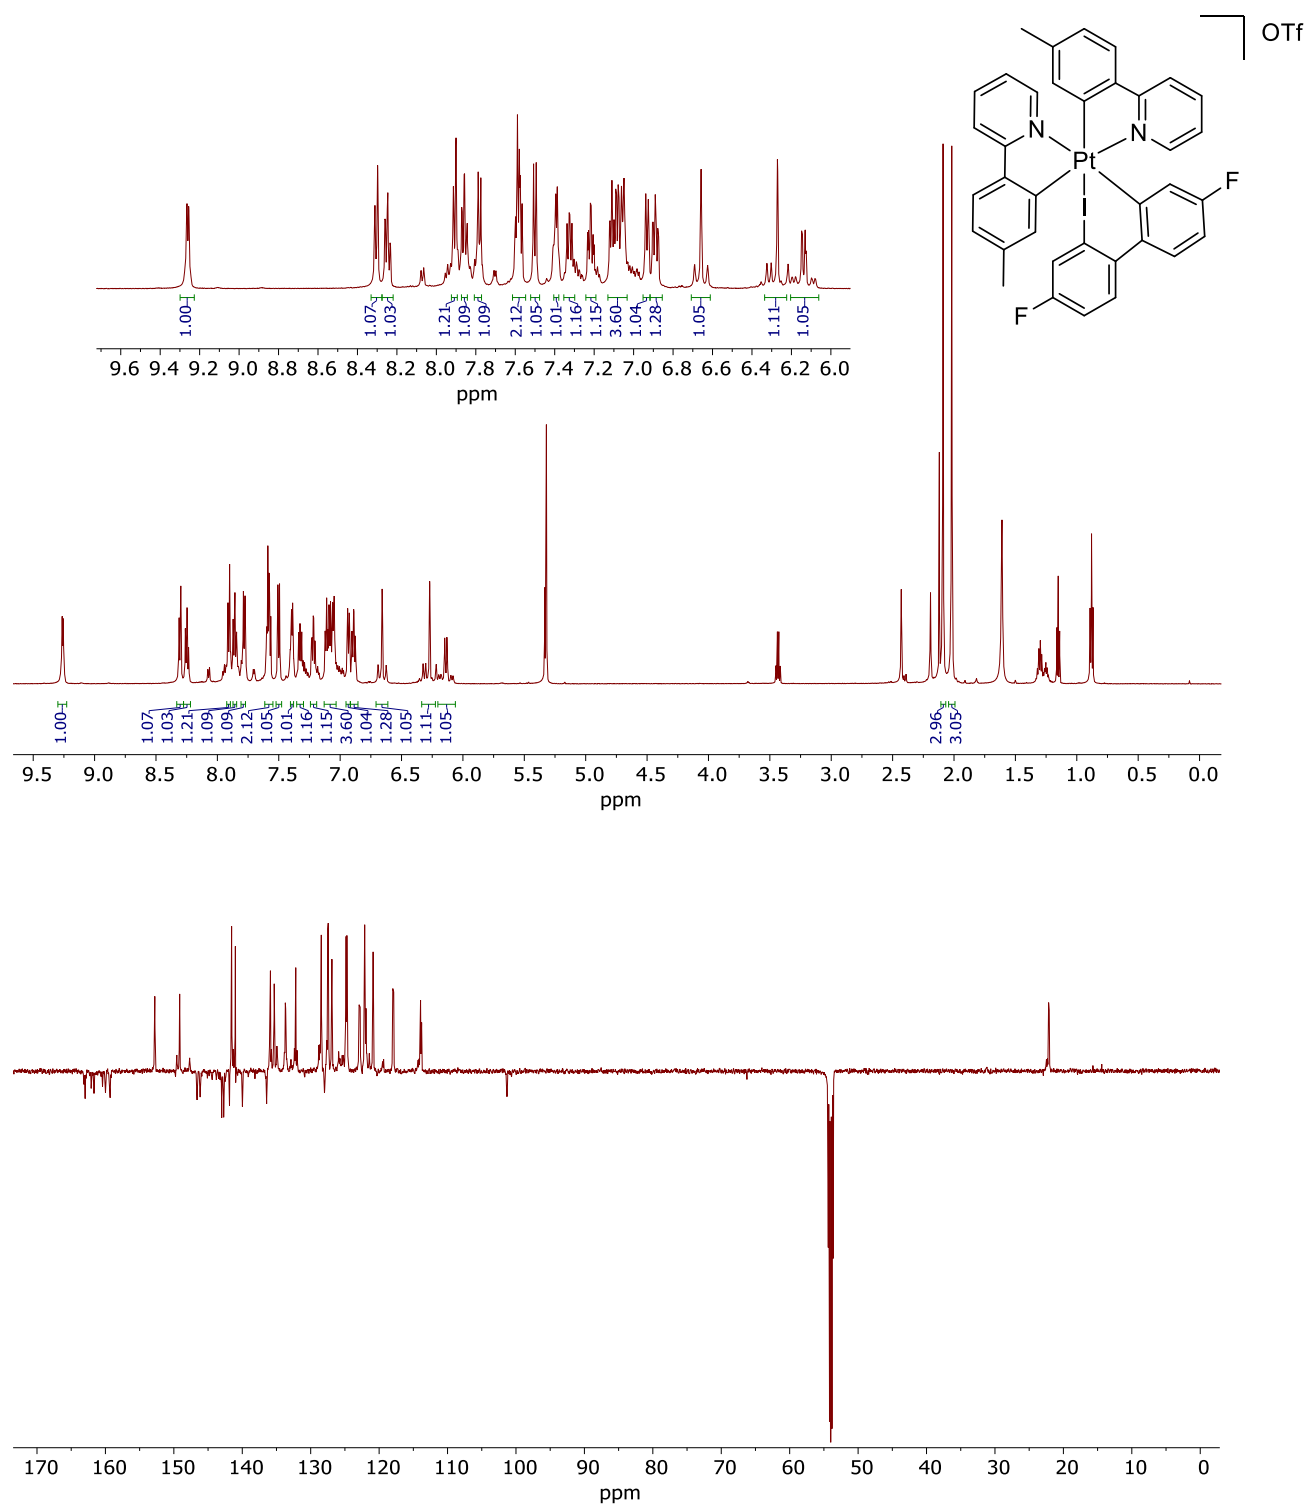

**Figure S11.**  $^1\text{H}$  (top) and  $^{13}\text{C}\{^1\text{H}\}$  APT (bottom) NMR spectra of complex **3bc** ( $\text{CD}_2\text{Cl}_2$ , 600 and 151 MHz, respectively). **Note:** Analytically pure samples this compound always showed additional signals corresponding to a secondary, minor product, possibly resulting from the decoordination of the iodine atom.

### 3. Additional discussion on NMR data

The  $^1\text{H}$  NMR spectra of complexes **2** and **3bc** show a series of resonances flanked by Pt satellites corresponding to inequivalent aromatic protons ortho to the metalated carbon atoms or the coordinated nitrogen atoms, whose chemical shifts are compiled in Table S2. They could be assigned as shown in Figure S12. The assignment to *c* or *d*, or *e* or *f* protons is based on the different values of Pt-H coupling constants, which are assumed to be larger for the protons ortho to shorter C–Pt bonds (*i.e.*, trans to N). The *a* and *b* protons could be distinguished because proton *a* in **3bc** is not shielded by any orthogonal aromatic ring and appears at 9.28 ppm, leaving proton *b* relatively unchanged with respect to the rest of complexes. The *f* resonance is absent for **3bc**. The main difference found for **2bc'** with respect to **2bc** is a resonance at 8.76 ppm arising from proton *g*, which is significantly downfield shifted relative to the analogous protons of **2bc** (*ca.* 7.50, 7.42 ppm) because it is directed toward the C–I bond and undergoes a strong through-space deshielding.

**Table S2.** Chemical shifts (ppm) of the assignable resonances of the protons ortho to the metalated carbon atoms or coordinated nitrogen atoms for the complexes described in this work (see Figure S12 for atom labeling).

| Complex     | Ha             | Hb             | Hc             | Hd             | He   | Hf             |
|-------------|----------------|----------------|----------------|----------------|------|----------------|
| <b>2aa</b>  | 7.96           | 7.62           | 6.89           | 6.77           | 6.64 | 6.27           |
| <b>2ab</b>  | – <sup>a</sup> | 7.51           | 6.82           | 6.66           | 6.60 | 6.35           |
| <b>2ac</b>  | 7.98           | 7.55           | – <sup>a</sup> | – <sup>a</sup> | 6.27 | 6.05           |
| <b>2ba</b>  | 7.90           | 7.57           | 6.76           | 6.57           | 6.71 | 6.26           |
| <b>2bb</b>  | 7.94           | 7.51           | 6.68           | 6.57           | 6.65 | 6.32           |
| <b>2bc</b>  | 7.93           | 7.52           | 6.66           | 6.58           | 6.30 | 6.02           |
| <b>2ca</b>  | 7.78           | – <sup>a</sup> | 6.59           | 6.35           | 6.64 | 6.45           |
| <b>2cb</b>  | 7.82           | 7.48           | 6.52           | 6.35           | 6.62 | 6.49           |
| <b>2cc</b>  | 7.80           | 7.58           | 6.50           | 6.38           | 6.29 | 6.18           |
| <b>2bc'</b> | – <sup>a</sup> | 7.43           | 6.58           | 6.44           | 6.40 | 6.11           |
| <b>3bc</b>  | 9.25           | 7.40           | 6.64           | 6.27           | 6.14 | – <sup>b</sup> |

<sup>a</sup> This resonances could not be discerned. <sup>b</sup> Absent.

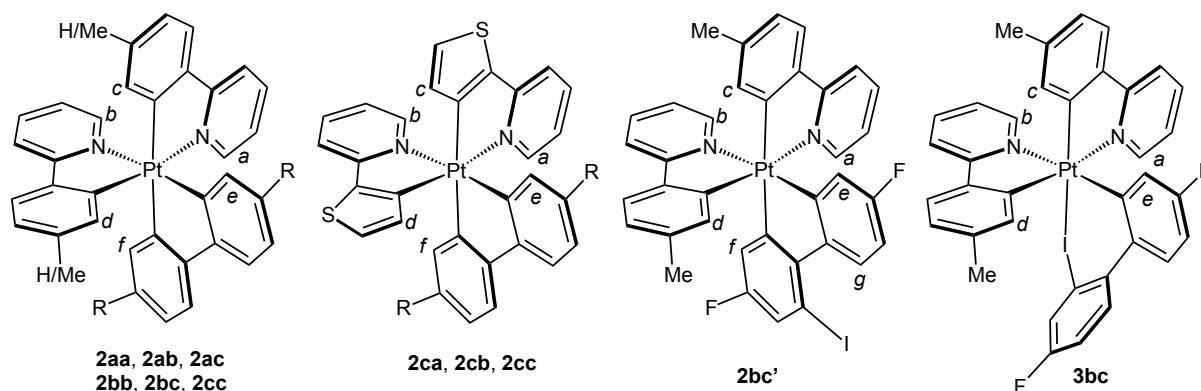

**Figure S12.** Labeling of aromatic H atoms for NMR assignments.

## 4. Additional photophysical data and discussion

### Electronic absorption spectra

The electronic absorption spectra of complexes **2** in CH<sub>2</sub>Cl<sub>2</sub> solution at 298 K (Figure S13, Table S3) show vibronically structured bands in the range 270-380 nm that are mainly attributable to singlet  $\pi$ - $\pi^*$  transitions within the C<sup>^</sup>N and C<sup>^</sup>C ligands (<sup>1</sup>LC). By comparing the different spectra, the maxima of the lowest <sup>1</sup>LC(C<sup>^</sup>N) absorption band could be identified, which appear in the range 305-330 nm for ppy and tpy derivatives or 350-365 nm for thpy derivatives, being slightly blue-shifted with respect to those of other neutral Pt(IV) complexes bearing these ligands.<sup>17,18</sup> Additional maxima or shoulders in the 290-300 nm range (ppy and tpy derivatives) or 300-330 nm (thpy derivatives) are assignable to partially obscured <sup>1</sup>LC(C<sup>^</sup>C) absorptions. A more precise understanding was gained from DFT and TDDFT calculations on the ppy and thpy complexes (see the next section). The most intense absorptions are predicted to arise from <sup>1</sup>LC(C<sup>^</sup>C) and <sup>1</sup>LC(C<sup>^</sup>N) transitions, the former having higher energies in all cases. The <sup>1</sup>LC(C<sup>^</sup>C) energies are affected by the R substituent, increasing in the order *t*-Bu (dbbph) < H (bph) < F (dFbph). Additionally, the calculations revealed the existence of relatively weak transitions of ligand-to-ligand charge-transfer character [<sup>1</sup>LLCT, (C<sup>^</sup>C)  $\rightarrow$  (C<sup>^</sup>N)], which emerge as the lowest-energy broad shoulder in the spectra of the ppy and tpy complexes at *ca.* 350 nm.

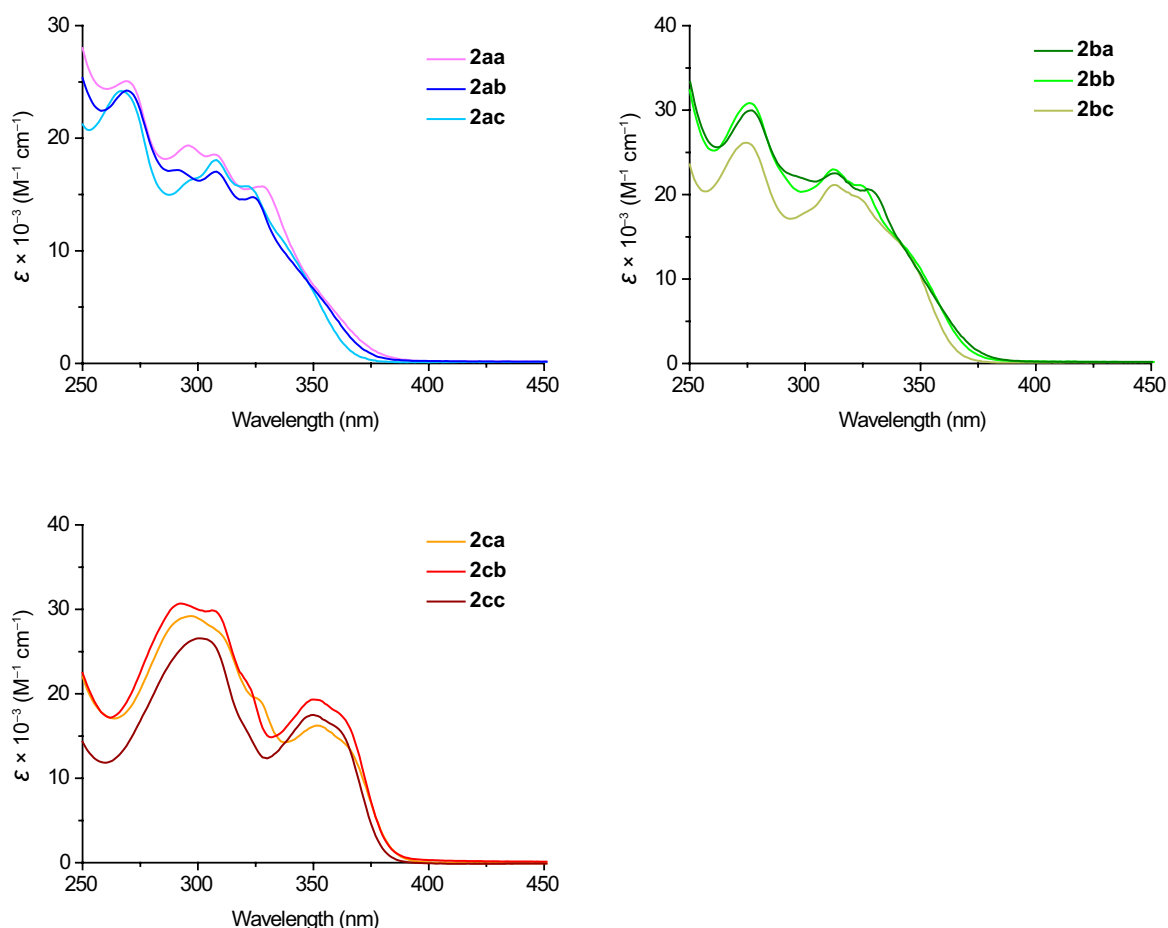

**Figure S13.** Electronic absorption spectra of complexes **2** in a CH<sub>2</sub>Cl<sub>2</sub> solution at 298 K

**Table S3.** Electronic absorption data for complexes **2** in CH<sub>2</sub>Cl<sub>2</sub> solution (*ca.* 5 × 10<sup>-5</sup> M) at 298 K.

| Complex    | $\lambda_{\max}/\text{nm}$ ( $\epsilon \times 10^{-3}/\text{M}^{-1} \text{cm}^{-1}$ ) |
|------------|---------------------------------------------------------------------------------------|
| <b>2aa</b> | 269 (24.3), 297 (28.6), 307 (17.8), 329 (14.9), 352 (6.3)                             |
| <b>2ab</b> | 270 (24.5), 292 (17.04), 307 (17.3), 325 (15.0), 346 (7.5)                            |
| <b>2ac</b> | 268 (23.6), 297 (15.8), 308 (17.5), 322 (15.2), 342 (9.0)                             |
| <b>2ba</b> | 277 (28.5), 299 (21.0), 313 (21.4), 330 (19.2), 349 (10.47)                           |
| <b>2bb</b> | 276 (30.7), 313 (22.8), 326 (20.3), 347 (12.3)                                        |
| <b>2bc</b> | 275 (26.0), 314 (21.0), 324 (18.9), 345 (12.8)                                        |
| <b>2ca</b> | 296 (29.2), 327 (19.2), 352 (16.2), 366 (13.4)                                        |
| <b>2cb</b> | 292 (31.2), 308 (30.3), 323 (20.4), 350 (19.9), 365 (16.9)                            |
| <b>2cc</b> | 302 (26.2), 348 (17.0), 362 (15.2)                                                    |

**Table S4.** Complete listing of emission peaks for complexes **2** at 298 K.

| Complex    | Medium                          | $\lambda_{\text{em}}/\text{nm}^a$ |
|------------|---------------------------------|-----------------------------------|
| <b>2aa</b> | CH <sub>2</sub> Cl <sub>2</sub> | 447, <i>461</i> , 477, 491        |
|            | PMMA                            | 448, <i>462</i> , 479, 495        |
| <b>2ab</b> | CH <sub>2</sub> Cl <sub>2</sub> | 452, <i>477</i> , 513             |
|            | PMMA                            | 452, <i>477</i> , 514             |
| <b>2ac</b> | CH <sub>2</sub> Cl <sub>2</sub> | 448, <i>476</i> , 507             |
|            | PMMA                            | <i>448</i> , 478, 503             |
| <b>2ba</b> | CH <sub>2</sub> Cl <sub>2</sub> | 456, <i>486</i> , 520             |
|            | PMMA                            | 457, <i>484</i> , 520             |
| <b>2bb</b> | CH <sub>2</sub> Cl <sub>2</sub> | <i>453</i> , 483, 513             |
|            | PMMA                            | <i>454</i> , 482, 516             |
| <b>2bc</b> | CH <sub>2</sub> Cl <sub>2</sub> | <i>453</i> , 482, 513             |
|            | PMMA                            | <i>452</i> , 482, 511             |
| <b>2ca</b> | CH <sub>2</sub> Cl <sub>2</sub> | 514, 529, <i>556</i>              |
|            | PMMA                            | <i>513</i> , 528, 551             |
| <b>2cb</b> | CH <sub>2</sub> Cl <sub>2</sub> | <i>514</i> , 531, 552             |
|            | PMMA                            | <i>513</i> , 527, 552             |
| <b>2cc</b> | CH <sub>2</sub> Cl <sub>2</sub> | 514, <i>554</i>                   |
|            | PMMA                            | <i>513</i> , 528, 550             |

<sup>a</sup>The most intense peak is italicized.

**Table S5.** Emission data for complexes **2** in 2-MeTHF glasses at 77 K.

| Complex    | $\lambda_{em}/nm^a$                       | $\tau/\mu s^b$       |
|------------|-------------------------------------------|----------------------|
| <b>2aa</b> | <i>456</i> , 474, 490, 510, 520, 531, 563 | 337 (25%), 525 (77%) |
| <b>2ab</b> | 452, 467, 475, 484, 513, 526, 554         | 364                  |
| <b>2ac</b> | 444, 466, 476, 502, 514, 546              | 308                  |
| <b>2ba</b> | 456, 472, 489, 511, 519, 531, 561         | 488                  |
| <b>2bb</b> | 451, 467, 475, 484, 511, 522, 557         | 317                  |
| <b>2bc</b> | 448, 483, 503, 519, 548                   | 262                  |
| <b>2ca</b> | 511, 529, 550, 571, 597                   | 293                  |
| <b>2cb</b> | 511, 530, 551, 572, 597                   | 316                  |
| <b>2cc</b> | 512, 527, 549, 572, 596                   | 355                  |

<sup>a</sup> The most intense peak is italicized. <sup>b</sup> Emission lifetime.

#### Additional data and discussion on the dual emission of **2aa**

The weak phosphorescence of **2aa** was assigned to a dual emission from <sup>3</sup>LC(ppy) and <sup>3</sup>LC(dbbph) excited states on the basis of its shape. The characteristic peaks of the <sup>3</sup>LC(ppy) emission at *ca.* 447 and 477 nm coincide with those of the corresponding emission of the other ppy derivatives and can be easily identified. The additional peaks correspond to the <sup>3</sup>LC(dbbph) emission. The shapes of the emission spectra measured in CH<sub>2</sub>Cl<sub>2</sub>, DMSO or MeOH solution, or in PMMA matrix, are very similar, but there are perceptible variations in the relative intensities of the observed peaks, suggesting that the two emissive states are affected differently by the medium (Figure S14). The emission spectra measured at different excitation wavelengths in CH<sub>2</sub>Cl<sub>2</sub>, DMSO or MeOH solutions are identical, but show some variations in the relative intensities of the different peaks when measured in PMMA (Figure S14), probably because the two emissive states are differently populated and their thermal equilibration is slower in the rigid medium.

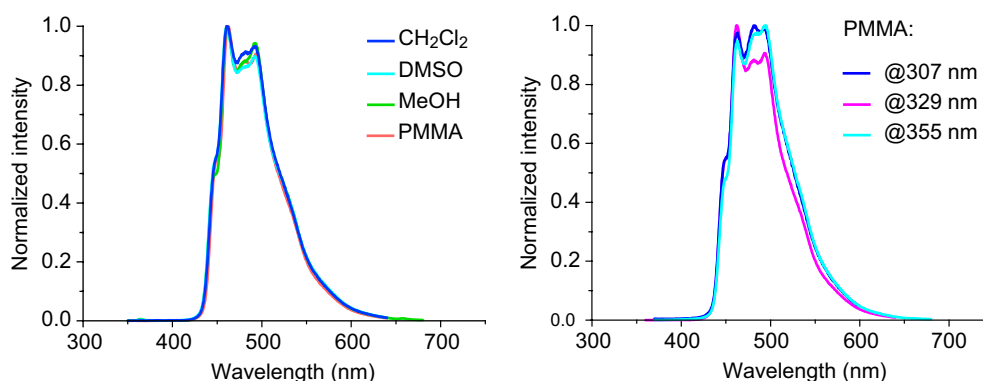**Figure S14.** Emission spectra of complex **2aa** in PMMA and different solvents at 298 K upon excitation at 329 nm (left) and in PMMA at different excitation wavelengths (right).

The excitation spectra of **2aa** registered at different emission wavelengths can be correlated with the absorption spectrum, which demonstrates that the emissions arise from the complex and not from possible impurities or photodecomposition products. The maxima at *ca.* 297, 307, 329 and the shoulder

at *ca.* 355 nm observed in the absorption spectrum can be found in the excitation spectra. However, their relative intensities depend on the medium and the emission wavelength (Figure S15). The differences are mainly attributable to lowest-energy feature at *ca.* 355 nm, which arises from a  $^1\text{LLCT}$  transition  $[(\text{C}^{\wedge}\text{C}) \rightarrow (\text{C}^{\wedge}\text{N})]$ . The relative contribution of this band to the excitation spectra is larger than expected, particularly in  $\text{CH}_2\text{Cl}_2$ . A possible explanation for this observation is that direct photoexcitation at the  $^1\text{LLCT}$  band leads to a more effective population of the emissive excited states via intersystem crossing compared with photoexcitation at higher-lying  $^1\text{LC}$  bands, probably because of slow internal conversion between singlet excited states. A similar behaviour has been previously observed for heteroleptic tris-cyclometalated Pt(IV) complexes.<sup>19</sup>

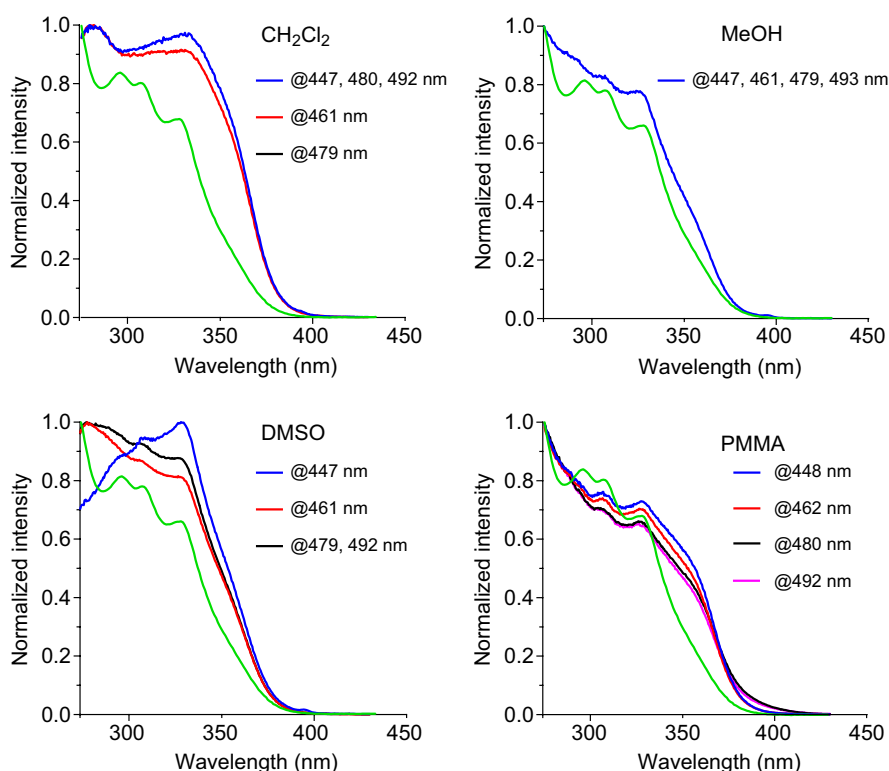

**Figure S15.** Excitation spectra of **2aa** in  $\text{CH}_2\text{Cl}_2$ , DMSO or MeOH solutions and in PMMA matrix at 298 K registered at the specified emission wavelengths compared with the absorption spectrum in  $\text{CH}_2\text{Cl}_2$  (green line).

In addition, the biexponential decays observed for **2aa** can be clearly ascribed to the presence of two different emissive states. The proportions of the two lifetime components were found to vary depending on the excitation and emission wavelength employed for the measurement in PMMA (Table S6). This can be explained by the variations in the relative intensities of each of the emissions.

**Table S6.** Emission lifetimes of **2aa** determined at different excitation or emission wavelengths in PMMA at 298 K.

| Excitation wavelength (nm) | Emission wavelength (nm) | $\tau / \mu\text{s}$ |
|----------------------------|--------------------------|----------------------|
| 328                        | 448                      | 94 (20%), 244 (80%)  |
| 328                        | 462                      | 88 (14%), 235 (86%)  |
| 307                        | 462                      | 87 (12%), 246 (88%)  |
| 352                        | 462                      | 84 (8%), 232 (92%)   |



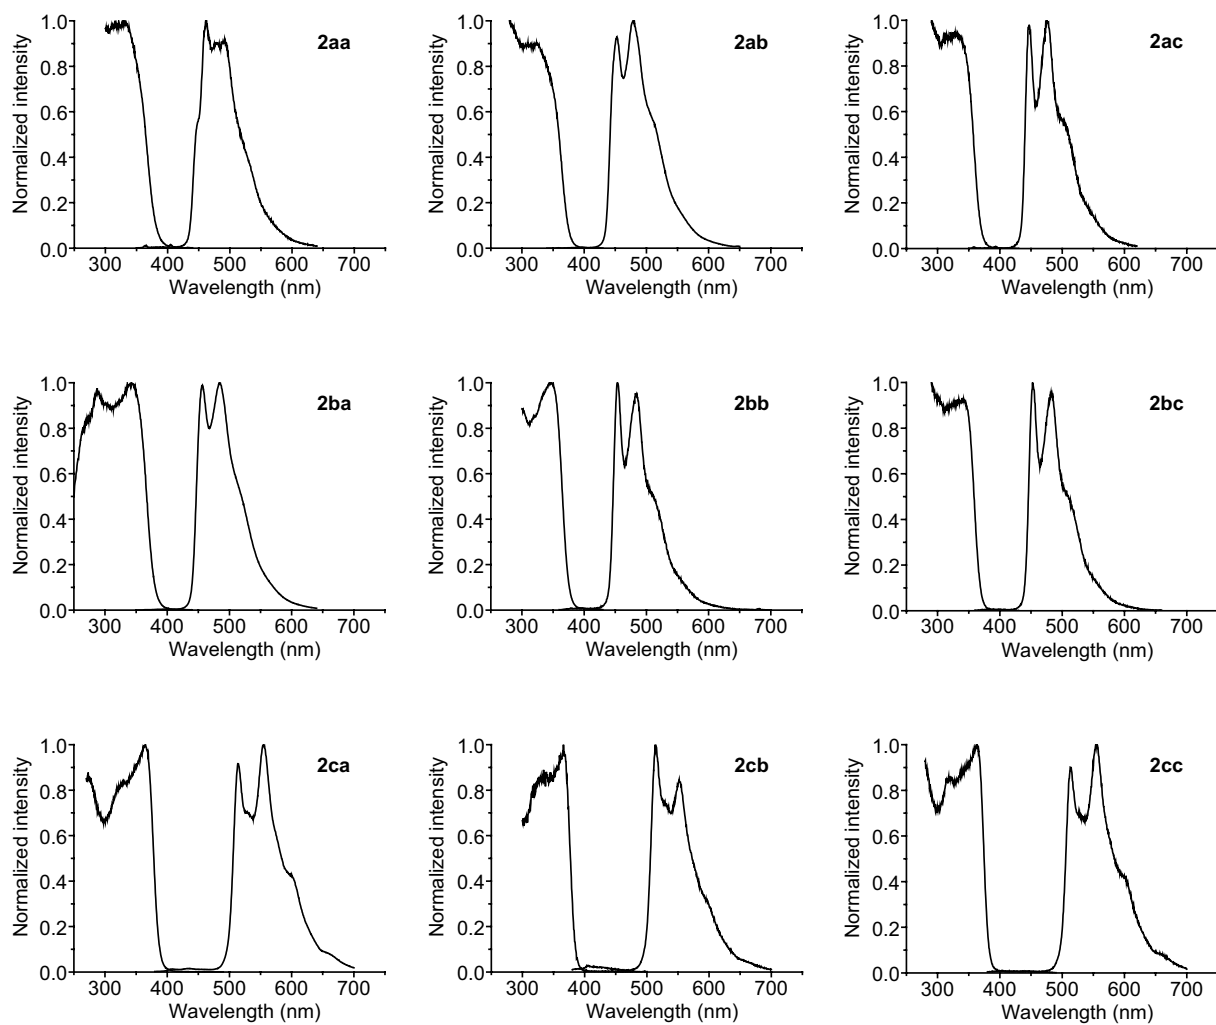

**Figure S16.** Excitation and emission spectra of complexes **2** in  $\text{CH}_2\text{Cl}_2$  at 298 K.

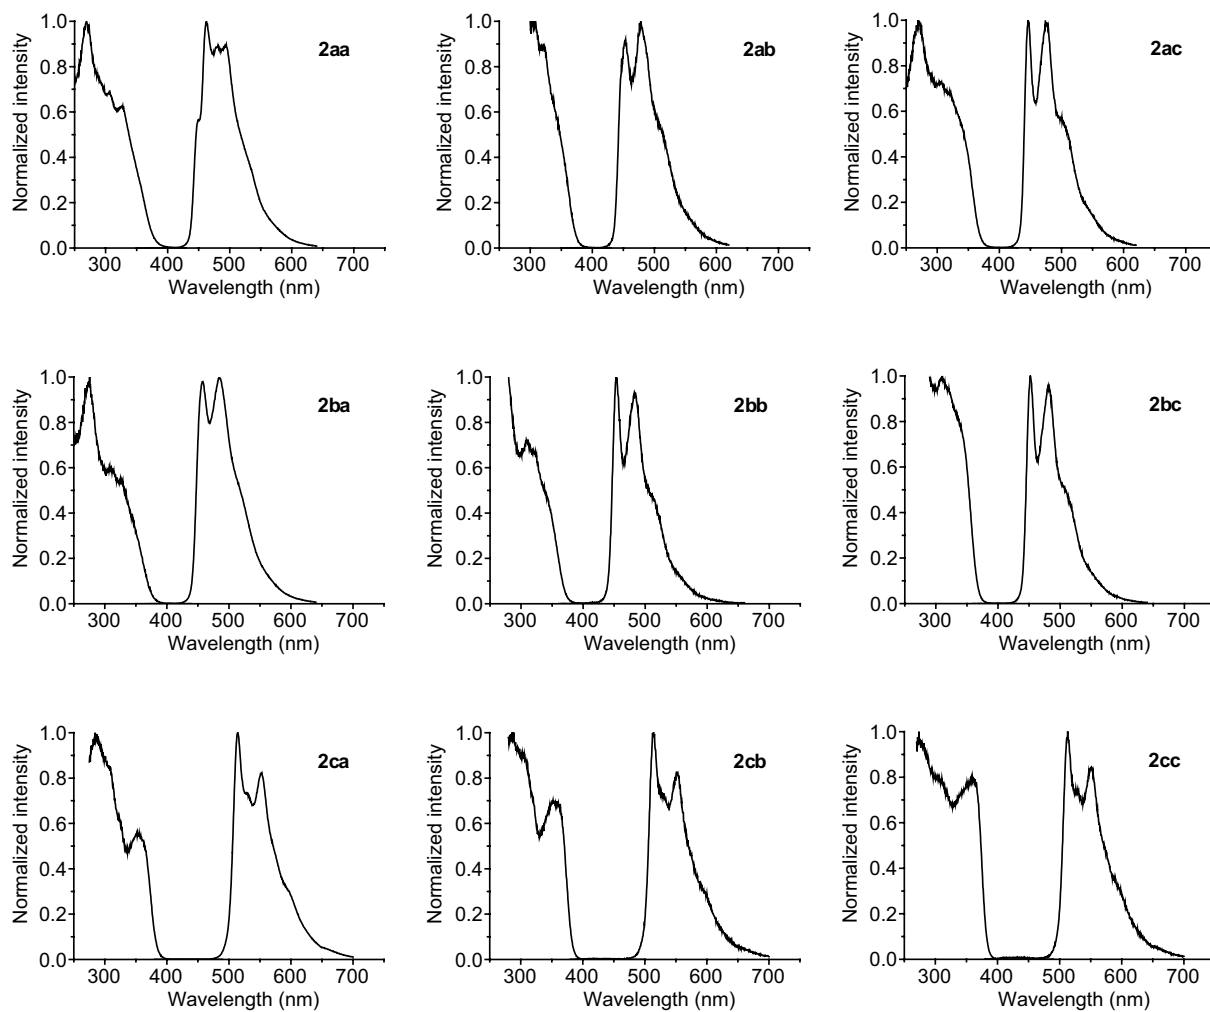

**Figure S17.** Excitation and emission spectra of complexes **2** in PMMA at 298 K.

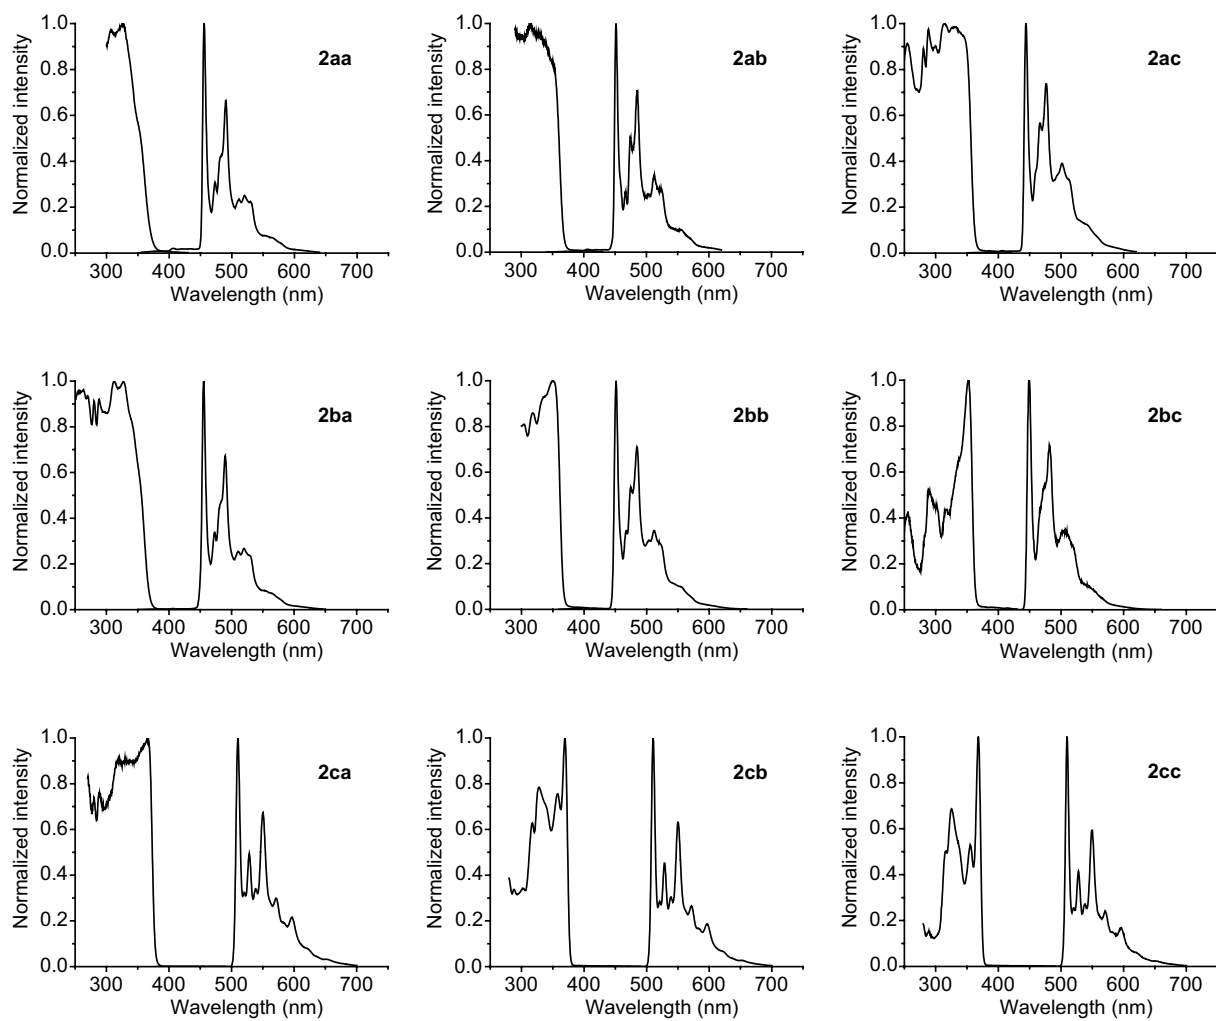

**Figure S18.** Excitation and emission spectra of complexes **2** in MeTHF at 298 K.

## 5. Computational data

### 5.1. Complex 2aa

**Table S7.** Fragment contributions (%; from atomic orbital contributions) to the frontier orbitals of **2aa** in CH<sub>2</sub>Cl<sub>2</sub> solution.

| energy (a.u.) | number       | L1 | L2 | L3 | Pt |
|---------------|--------------|----|----|----|----|
| -0.003        | 168 (LUMO+5) | 20 | 11 | 43 | 27 |
| -0.018        | 167 (LUMO+4) | 2  | 5  | 89 | 4  |
| -0.034        | 166 (LUMO+3) | 47 | 51 | 0  | 2  |
| -0.040        | 165 (LUMO+2) | 51 | 44 | 4  | 2  |
| -0.055        | 164 (LUMO+1) | 87 | 10 | 2  | 1  |
| -0.056        | 163 (LUMO)   | 11 | 86 | 1  | 2  |
| -0.191        | 162 (HOMO)   | 0  | 0  | 97 | 3  |
| -0.210        | 161 (HOMO-1) | 30 | 30 | 32 | 8  |
| -0.222        | 160 (HOMO-2) | 2  | 77 | 12 | 8  |
| -0.225        | 159 (HOMO-3) | 4  | 11 | 76 | 9  |
| -0.226        | 158 (HOMO-4) | 2  | 8  | 82 | 8  |
| -0.231        | 157 (HOMO-5) | 74 | 9  | 15 | 3  |

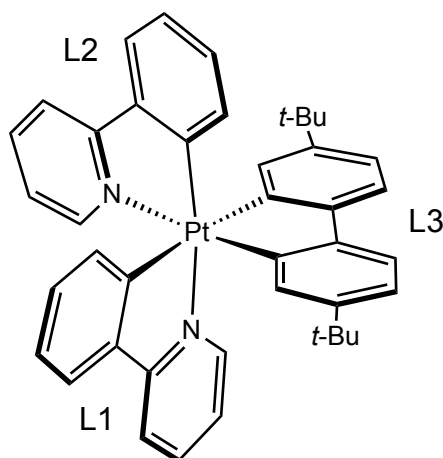

**Figure S19.** Ligand numbering in complex **2aa**.

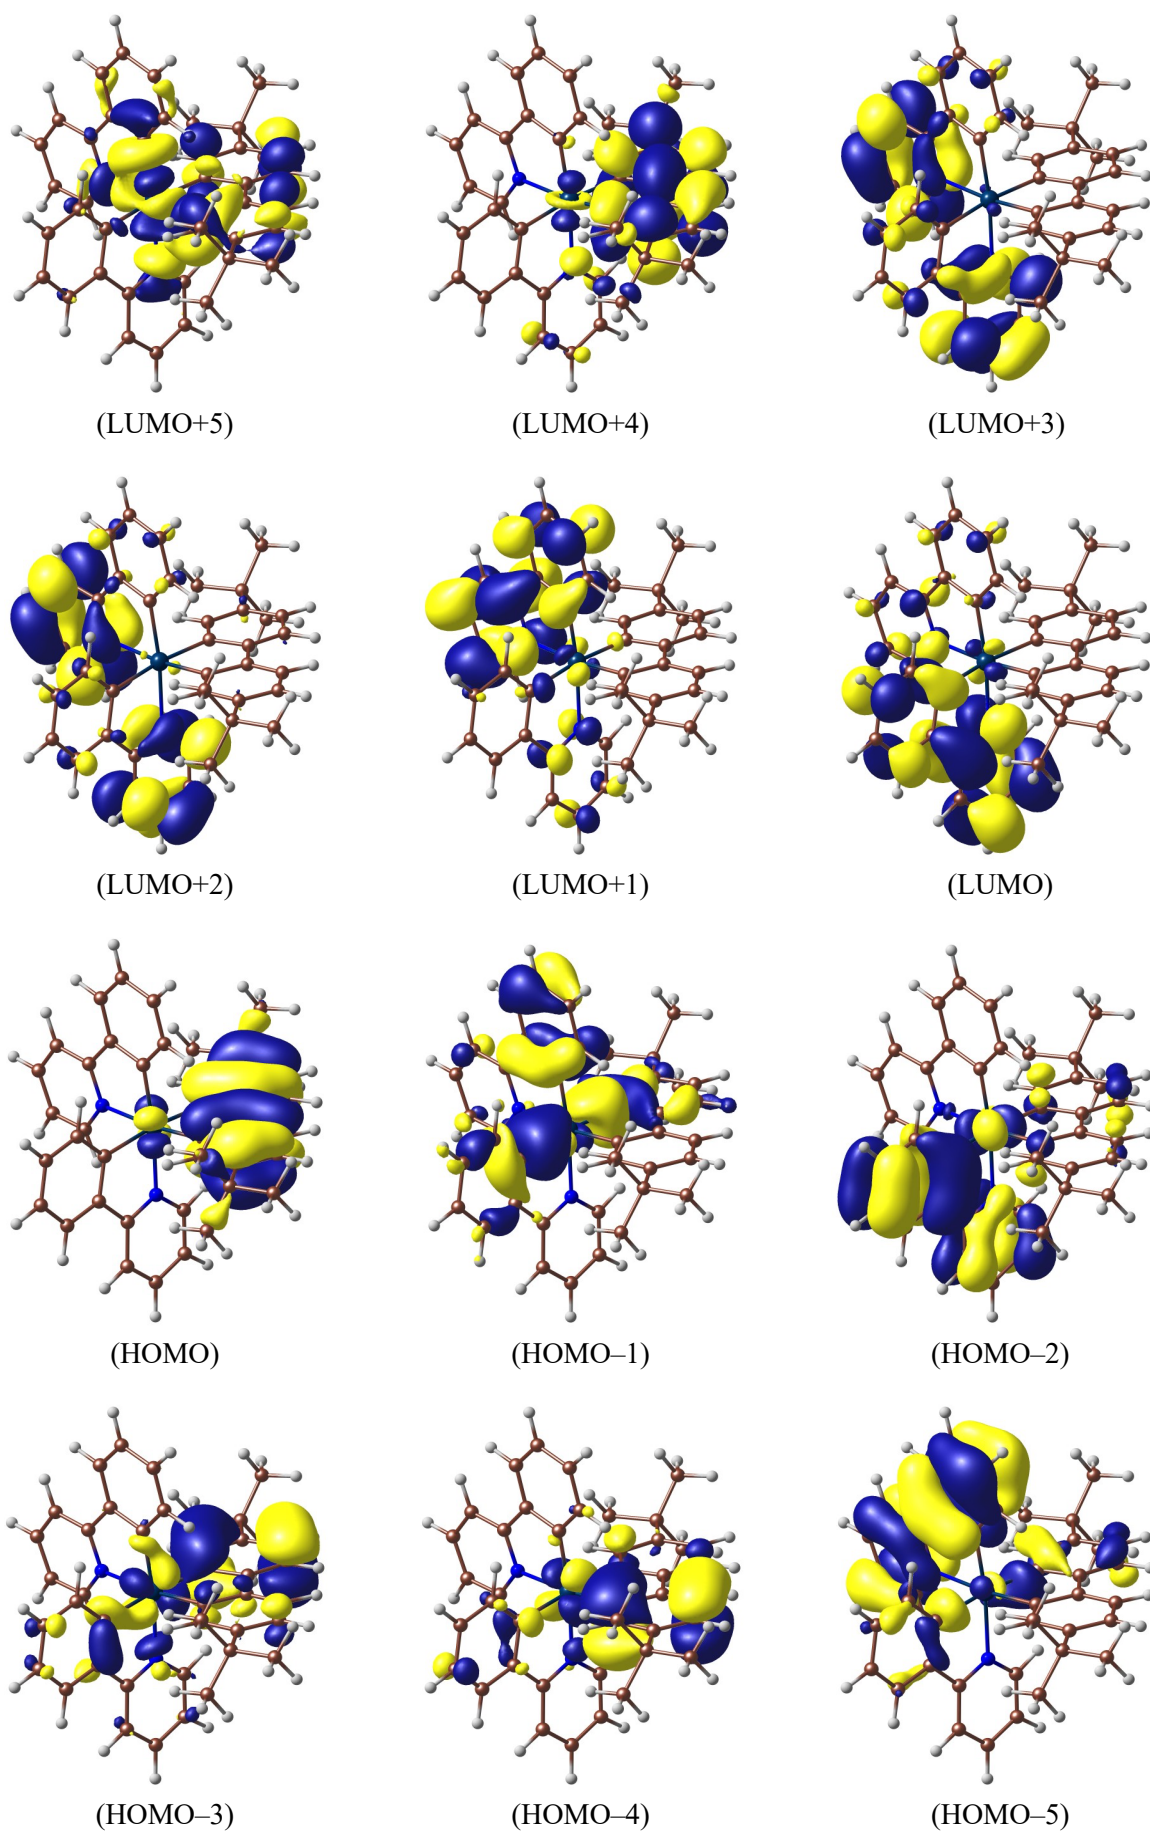

**Figure S20.** Molecular orbital isosurfaces of **2aa** ( $0.03 \text{ e bohr}^{-3}$ ).

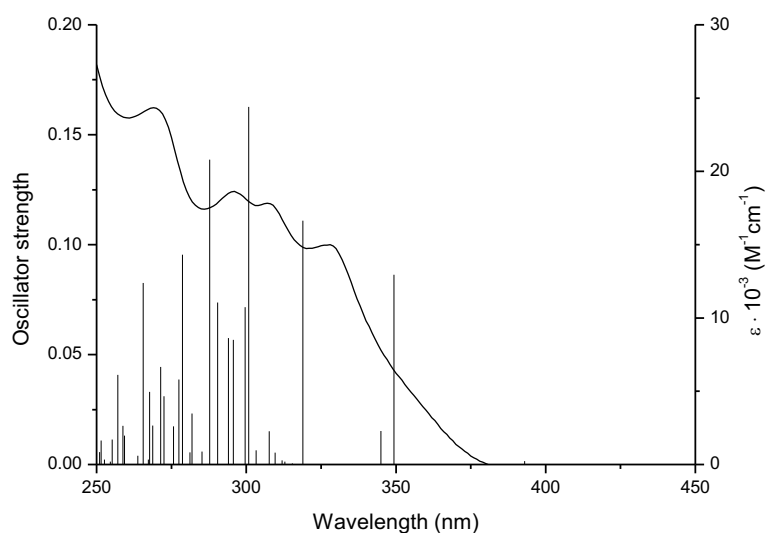

**Figure S21.** Calculated stick absorption spectrum of **2aa** compared with the experimental spectrum in  $\text{CH}_2\text{Cl}_2$  solution (*ca.*  $1 \times 10^{-5}$  M) at 298 K.

**Table S8.** Selected vertical singlet excitations of **2aa** from TDDFT calculations at the ground state geometry in  $\text{CH}_2\text{Cl}_2$  solution.

| state | monoexcitations <sup>a</sup>                                       | $\Delta E/\text{eV}$ | $\lambda/\text{nm}$ | oscillator strength | main character       |
|-------|--------------------------------------------------------------------|----------------------|---------------------|---------------------|----------------------|
| S4:   | H-1 → L (8%)<br>H-1 → L+1 (90%)                                    | 3.552                | 349.0               | 0.0868              | LC(C <sup>^</sup> N) |
| S5:   | H → L+2 (95%)<br>H → L+3 (4%)                                      | 3.597                | 344.7               | 0.0157              | LLCT                 |
| S7:   | H-6 → L (2%)<br>H-2 → L (88%)                                      | 3.892                | 318.6               | 0.1114              | LC(C <sup>^</sup> N) |
| S12:  | H-4 → L (39%)<br>H-4 → L+1 (5%)<br>H-3 → L (43%)<br>H-3 → L+1 (5%) | 4.034                | 307.4               | 0.0156              | LLCT                 |
| S14:  | H-4 → L+1 (5%)<br>H-1 → L+3 (19%)<br>H → L+4 (61%)<br>H → L+5 (7%) | 4.126                | 300.5               | 0.1631              | LC(C <sup>^</sup> C) |
| S15:  | H-1 → L+3 (75%)<br>H → L+4 (17%)<br>H → L+5 (2%)                   | 4.143                | 299.3               | 0.0720              | LLCT                 |

<sup>a</sup> H = HOMO; L = LUMO.

**Table S9.** Lowest-energy vertical triplet excitations of **2aa** from TDDFT calculations at the ground state geometry in CH<sub>2</sub>Cl<sub>2</sub> solution.

| state | monoexcitations <sup>a</sup>                                                                                                                       | $\Delta E/eV$ | $\lambda/nm$ | main character |
|-------|----------------------------------------------------------------------------------------------------------------------------------------------------|---------------|--------------|----------------|
| T1:   | H-8 -> L+14 (2%)<br>H -> L+2 (7%)<br>H -> L+4 (75%)                                                                                                | 2.888         | 429.3        | LC(C^C)        |
| T2:   | H-6 -> L (10%)<br>H-3 -> L (4%)<br>H-2 -> L (54%)<br>H-2 -> L+1 (5%)<br>H-2 -> L+3 (3%)                                                            | 2.957         | 419.3        | LC(C^N)        |
| T3:   | H-5 -> L (7%)<br>H-5 -> L+1 (40%)<br>H-5 -> L+2 (2%)<br>H-5 -> L+3 (2%)<br>H-3 -> L+1 (2%)<br>H-2 -> L+1 (3%)<br>H-1 -> L (4%)<br>H-1 -> L+1 (23%) | 2.971         | 417.4        | LC(C^N)        |

<sup>a</sup> H = HOMO; L = LUMO.

## 5.2. Complex 2ab

**Table S10.** Fragment contributions (%; from atomic orbital contributions) to the frontier orbitals of **2ab** in CH<sub>2</sub>Cl<sub>2</sub> solution.

| energy (a.u.) | number       | L1 | L2 | L3 | Pt |
|---------------|--------------|----|----|----|----|
| -0.005        | 136 (LUMO+5) | 19 | 10 | 44 | 27 |
| -0.022        | 135 (LUMO+4) | 2  | 6  | 88 | 4  |
| -0.034        | 134 (LUMO+3) | 48 | 49 | 1  | 2  |
| -0.040        | 133 (LUMO+2) | 49 | 44 | 5  | 2  |
| -0.056        | 132 (LUMO+1) | 87 | 11 | 0  | 1  |
| -0.057        | 131 (LUMO)   | 12 | 86 | 0  | 2  |
| -0.199        | 130 (HOMO)   | 0  | 0  | 95 | 4  |
| -0.212        | 129 (HOMO-1) | 33 | 29 | 30 | 8  |
| -0.223        | 128 (HOMO-2) | 2  | 86 | 4  | 8  |
| -0.228        | 127 (HOMO-3) | 9  | 10 | 72 | 10 |
| -0.230        | 126 (HOMO-4) | 2  | 4  | 87 | 7  |
| -0.232        | 125 (HOMO-5) | 69 | 8  | 21 | 2  |

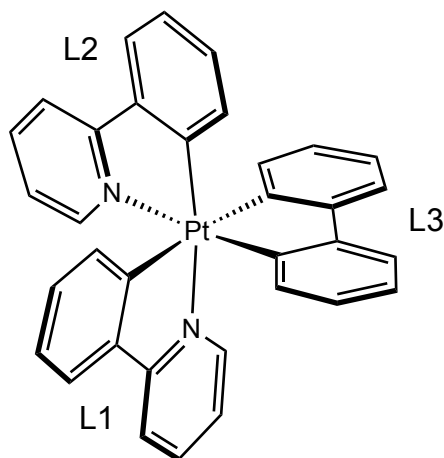

**Figure S22.** Ligand numbering in complex **2ab**.



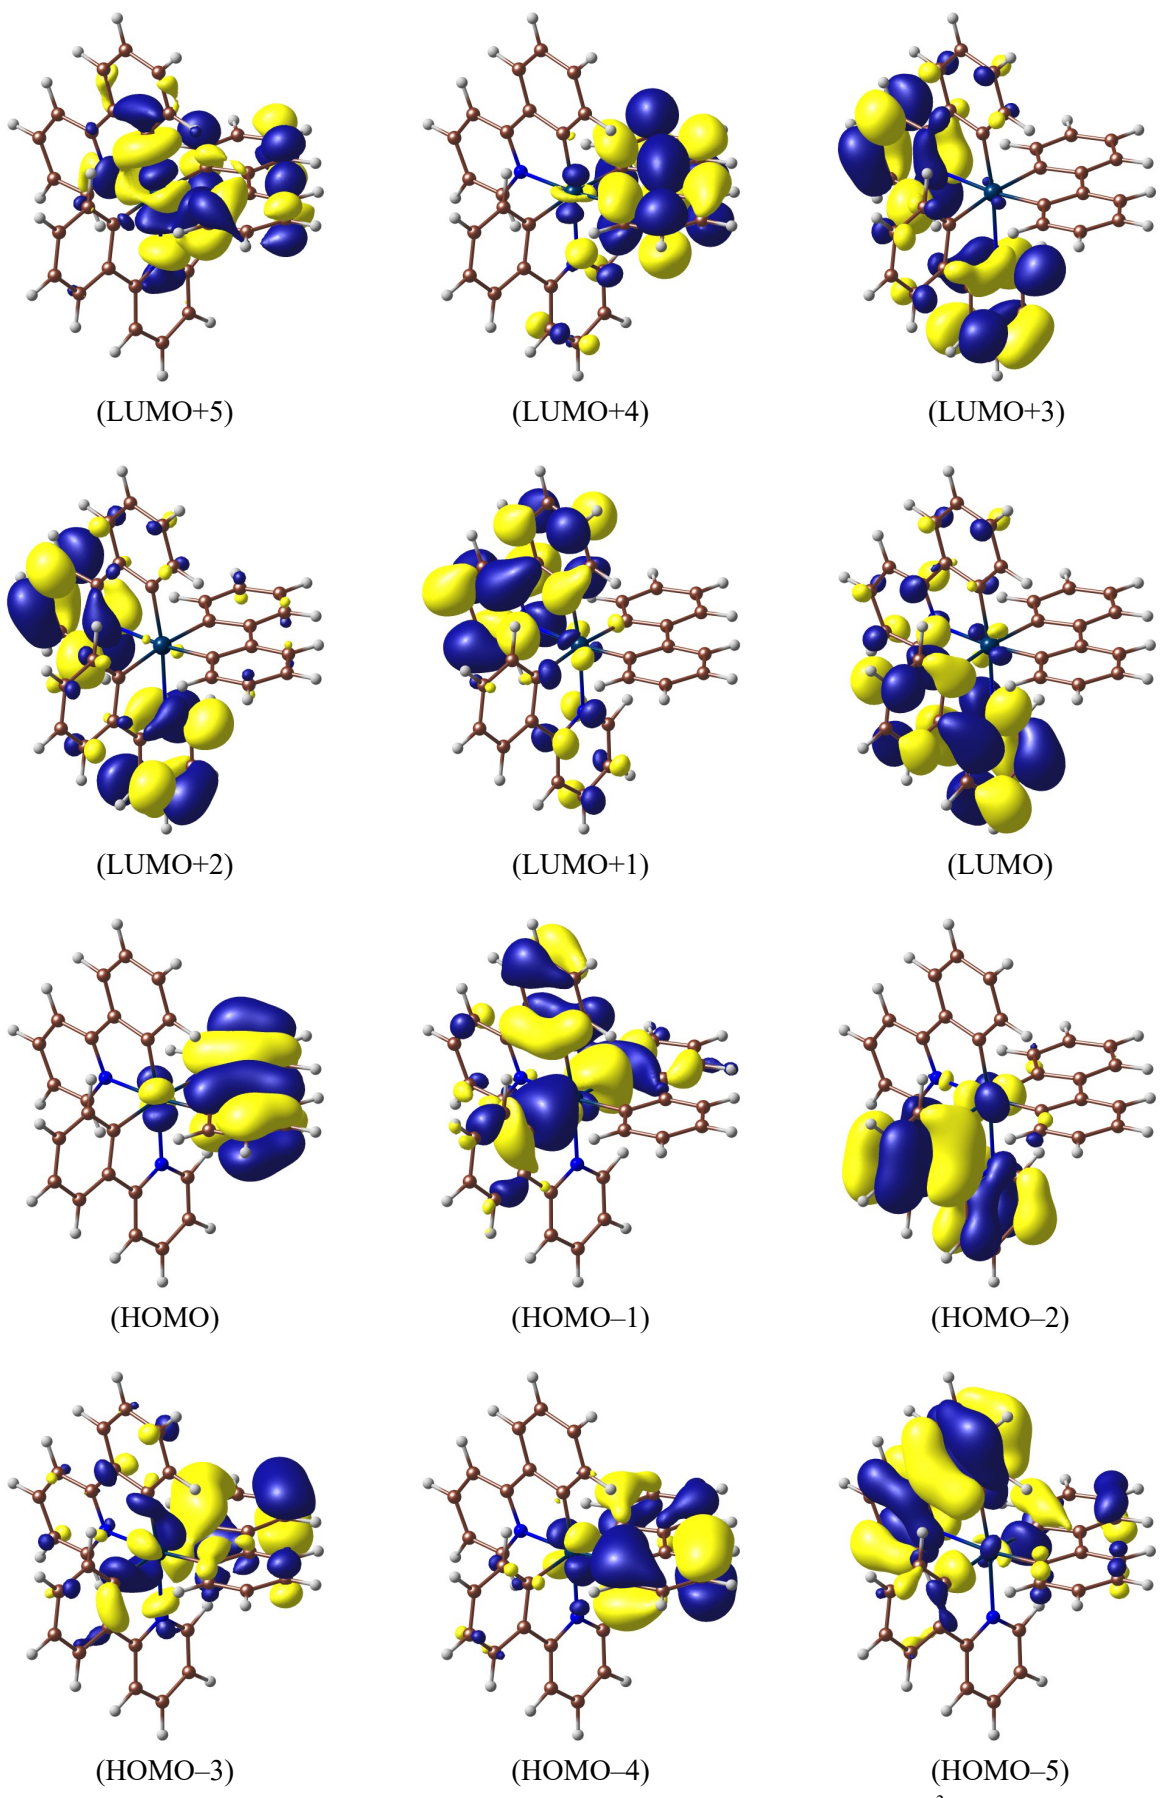

**Figure S23.** Molecular orbital isosurfaces of **2ab** ( $0.03 \text{ e bohr}^{-3}$ ).

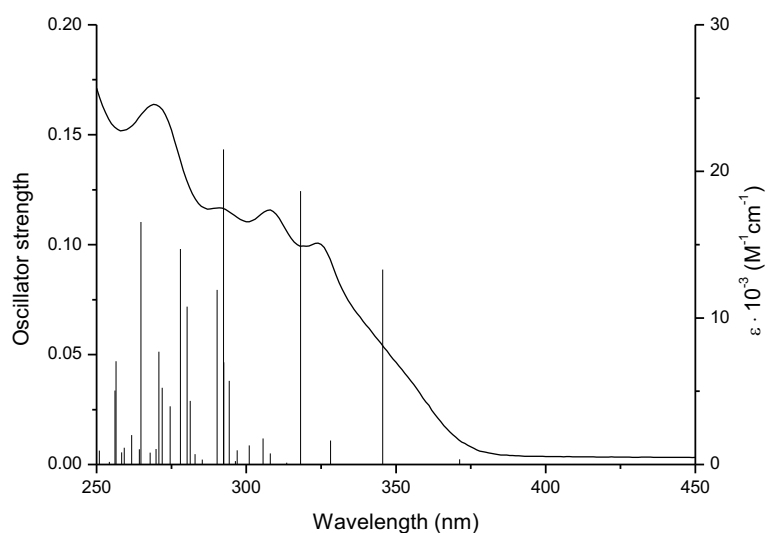

**Figure S24.** Calculated stick absorption spectrum of **2ab** compared with the experimental spectrum in  $\text{CH}_2\text{Cl}_2$  solution (*ca.*  $1 \times 10^{-5}$  M) at 298 K.

**Table S11.** Selected vertical singlet excitations of **2ab** from TDDFT calculations at the ground state geometry in  $\text{CH}_2\text{Cl}_2$  solution.

| state | monoexcitations                                                                      | $\Delta E/\text{eV}$ | $\lambda/\text{nm}$ | oscillator strength | main character       |
|-------|--------------------------------------------------------------------------------------|----------------------|---------------------|---------------------|----------------------|
| S4:   | H-1 → L (8%)<br>H-1 → L+1 (89%)                                                      | 3.592                | 345.2               | 0.0891              | LLCT/LC              |
| S5:   | H → L+2 (95%)<br>H → L+3 (4%)                                                        | 3.781                | 327.9               | 0.0113              | LLCT                 |
| S6:   | H-6 → L (3%)<br>H-2 → L (88%)                                                        | 3.902                | 317.8               | 0.1248              | LC(C <sup>^</sup> N) |
| S11:  | H-3 → L (18%)<br>H-3 → L+1 (78%)                                                     | 4.062                | 305.3               | 0.0123              | LLCT                 |
| S15:  | H-5 → L (23%)<br>H-5 → L+1 (57%)<br>H-4 → L (4%)<br>H-2 → L+2 (4%)<br>H → L+4 (2%)   | 4.217                | 294.0               | 0.0385              | LLCT                 |
| S16:  | H-5 → L (61%)<br>H-5 → L+1 (17%)<br>H-4 → L+1 (3%)<br>H-1 → L+3 (4%)<br>H → L+4 (8%) | 4.243                | 292.2               | 0.0469              | LLCT                 |
| S17:  | H-5 → L (4%)<br>H-5 → L+1 (8%)<br>H → L+4 (69%)<br>H → L+5 (9%)                      | 4.245                | 292.1               | 0.1438              | LC(C <sup>^</sup> C) |

<sup>a</sup> H = HOMO; L = LUMO.

**Table S12.** Lowest-energy vertical triplet excitations of **2ab** from TDDFT calculations at the ground state geometry in CH<sub>2</sub>Cl<sub>2</sub> solution.

| state | monoexcitations <sup>a</sup>                                                                                                                       | $\Delta E/eV$ | $\lambda/nm$ | main character       |
|-------|----------------------------------------------------------------------------------------------------------------------------------------------------|---------------|--------------|----------------------|
| T1:   | H-8 -> L+13 (3%)<br>H-4 -> L+5 (2%)<br>H-3 -> L+9 (2%)<br>H -> L+2 (8%)<br>H -> L+4 (73%)                                                          | 2.944         | 421.2        | LC(C <sup>^</sup> C) |
| T2:   | H-6 -> L (10%)<br>H-2 -> L (58%)<br>H-2 -> L+1 (6%)<br>H-2 -> L+3 (3%)                                                                             | 2.956         | 419.4        | LC(C <sup>^</sup> N) |
| T3:   | H-7 -> L+7 (2%)<br>H-5 -> L (6%)<br>H-5 -> L+1 (37%)<br>H-5 -> L+3 (2%)<br>H-3 -> L+1 (6%)<br>H-2 -> L+1 (2%)<br>H-1 -> L (4%)<br>H-1 -> L+1 (23%) | 2.974         | 416.9        | LC(C <sup>^</sup> N) |

<sup>a</sup> H = HOMO; L = LUMO.

### 5.3. Complex 2ac

**Table S13.** Fragment contributions (%; from atomic orbital contributions) to the frontier orbitals of **2ac** in CH<sub>2</sub>Cl<sub>2</sub> solution.

| energy (a.u.) | number       | L1 | L2 | L3 | Pt |
|---------------|--------------|----|----|----|----|
| -0.012        | 144 (LUMO+5) | 14 | 8  | 56 | 21 |
| -0.021        | 143 (LUMO+4) | 2  | 5  | 87 | 5  |
| -0.036        | 142 (LUMO+3) | 47 | 51 | 0  | 2  |
| -0.042        | 141 (LUMO+2) | 51 | 44 | 3  | 2  |
| -0.058        | 140 (LUMO+1) | 83 | 14 | 0  | 2  |
| -0.059        | 139 (LUMO)   | 15 | 82 | 0  | 2  |
| -0.197        | 138 (HOMO)   | 0  | 0  | 97 | 3  |
| -0.217        | 137 (HOMO-1) | 39 | 27 | 27 | 8  |
| -0.226        | 136 (HOMO-2) | 2  | 90 | 2  | 7  |
| -0.233        | 135 (HOMO-3) | 61 | 17 | 17 | 6  |
| -0.238        | 134 (HOMO-4) | 2  | 25 | 67 | 6  |
| -0.238        | 133 (HOMO-5) | 20 | 12 | 60 | 9  |

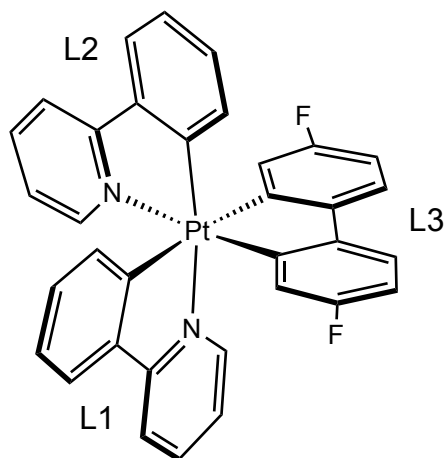

**Figure S25.** Ligand numbering in complex **2ac**.

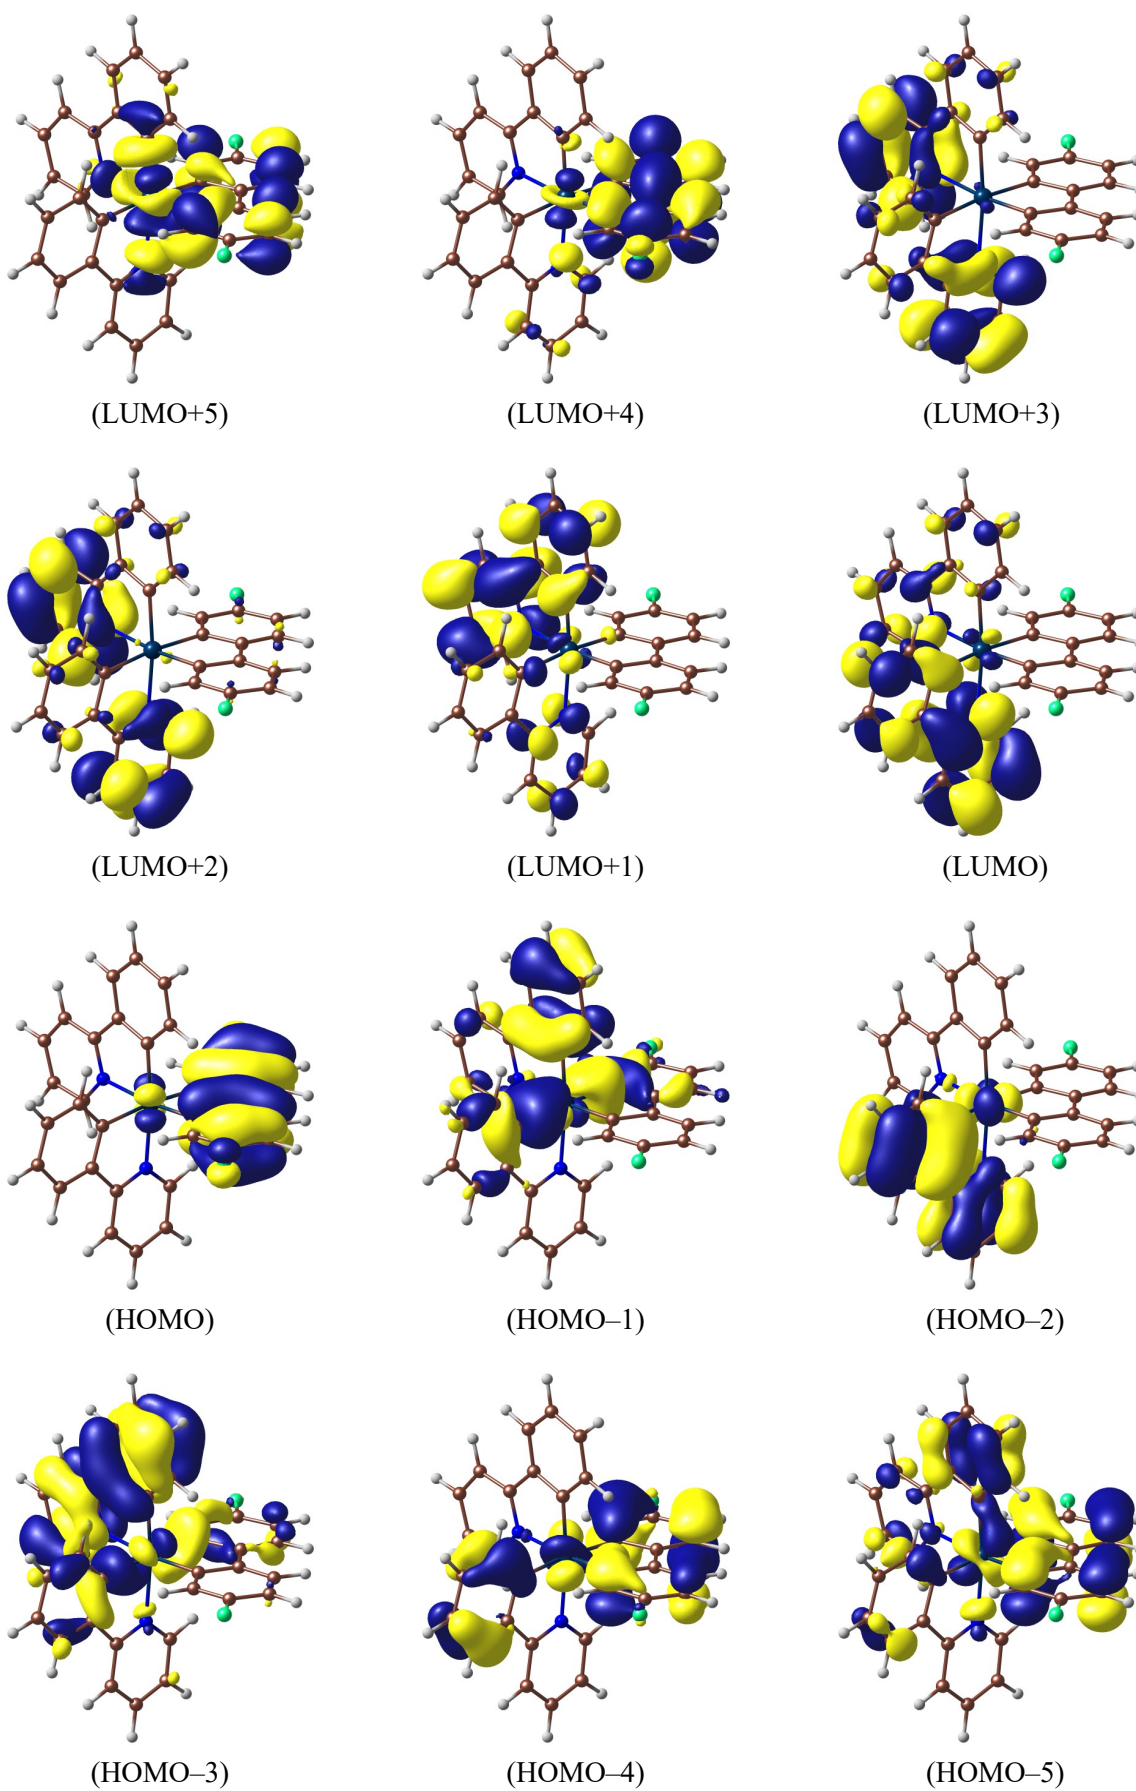

**Figure S26.** Molecular orbital isosurfaces of **2ac** ( $0.03 \text{ e bohr}^{-3}$ ).

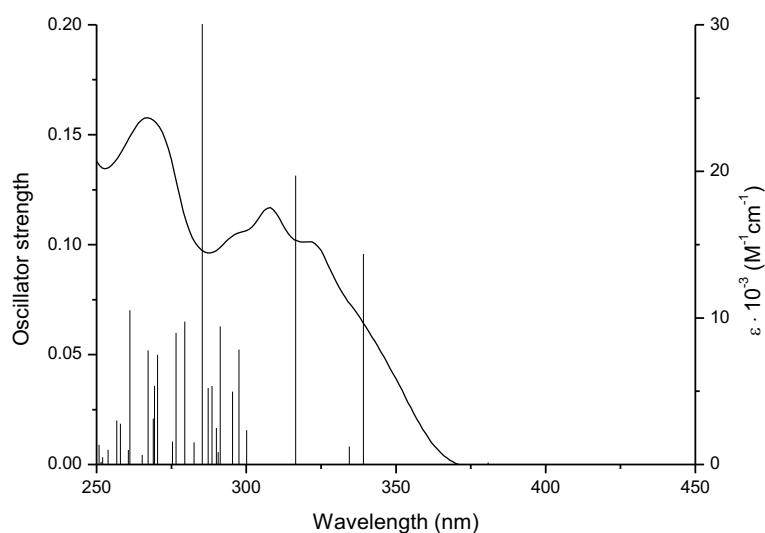

**Figure S27.** Calculated stick absorption spectrum of **2ac** compared with the experimental spectrum in  $\text{CH}_2\text{Cl}_2$  solution (*ca.*  $1 \times 10^{-5}$  M) at 298 K.

**Table S14.** Selected vertical singlet excitations of **2ac** from TDDFT calculations at the ground state geometry in  $\text{CH}_2\text{Cl}_2$  solution.

| state | monoexcitations                                                                                                        | $\Delta E/\text{eV}$ | $\lambda/\text{nm}$ | oscillator strength | main character       |
|-------|------------------------------------------------------------------------------------------------------------------------|----------------------|---------------------|---------------------|----------------------|
| S4:   | H-1 → L (14%)<br>H-1 → L+1 (83%)                                                                                       | 3.659                | 338.8               | 0.0962              | LLCT/LC              |
| S5:   | H → L+2 (96%)<br>H → L+3 (3%)                                                                                          | 3.711                | 334.1               | 0.0087              | LLCT                 |
| S7:   | H-2 → L (85%)<br>H-2 → L+1 (5%)                                                                                        | 3.921                | 316.2               | 0.1319              | LC(C <sup>^</sup> N) |
| S11:  | H-5 → L+1 (4%)<br>H-4 → L (3%)<br>H-4 → L+1 (3%)<br>H-3 → L (26%)<br>H-3 → L+1 (50%)<br>H → L+4 (4%)                   | 4.172                | 297.2               | 0.0527              | LLCT                 |
| S13:  | H-5 → L (24%)<br>H-5 → L+1 (7%)<br>H-4 → L (38%)<br>H-4 → L+1 (9%)<br>H-2 → L+2 (6%)<br>H-1 → L+3 (2%)<br>H → L+5 (3%) | 4.261                | 291.0               | 0.0632              | LLCT                 |
| S19:  | H-4 → L+4 (5%)<br>H → L+4 (43%)<br>H → L+5 (41%)                                                                       | 4.350                | 285.0               | 0.2033              | LC(C <sup>^</sup> C) |

<sup>a</sup> H = HOMO; L = LUMO.

**Table S15.** Lowest-energy vertical triplet excitations of **2ac** from TDDFT calculations at the ground state geometry in CH<sub>2</sub>Cl<sub>2</sub> solution.

| state | monoexcitations <sup>a</sup>                                                                                                                       | $\Delta E/eV$ | $\lambda/nm$ | main character       |
|-------|----------------------------------------------------------------------------------------------------------------------------------------------------|---------------|--------------|----------------------|
| T1:   | H-6 -> L (5%)<br>H-2 -> L (55%)<br>H-2 -> L+1 (11%)<br>H-2 -> L+3 (4%)<br>H -> L+4 (2%)                                                            | 2.957         | 419.3        | LC(C <sup>^</sup> N) |
| T2:   | H-8 -> L+14 (3%)<br>H-5 -> L+9 (2%)<br>H-4 -> L+5 (3%)<br>H -> L+2 (7%)<br>H -> L+4 (71%)                                                          | 2.961         | 418.8        | LC(C <sup>^</sup> C) |
| T3:   | H-7 -> L+7 (2%)<br>H-5 -> L+1 (6%)<br>H-3 -> L (9%)<br>H-3 -> L+1 (33%)<br>H-3 -> L+3 (2%)<br>H-1 -> L (6%)<br>H-1 -> L+1 (22%)<br>H-1 -> L+7 (2%) | 2.977         | 416.5        | LC(C <sup>^</sup> N) |

<sup>a</sup> H = HOMO; L = LUMO.

#### 5.4. Complex 2ca

**Table S16.** Fragment contributions (%; from atomic orbital contributions) to the frontier orbitals of **2ca** in CH<sub>2</sub>Cl<sub>2</sub> solution.

| energy (a.u.) | number       | L1 | L2 | L3 | Pt |
|---------------|--------------|----|----|----|----|
| -0.011        | 170 (LUMO+5) | 25 | 9  | 43 | 24 |
| -0.022        | 169 (LUMO+4) | 4  | 8  | 79 | 9  |
| -0.034        | 168 (LUMO+3) | 47 | 50 | 1  | 2  |
| -0.038        | 167 (LUMO+2) | 50 | 44 | 4  | 2  |
| -0.057        | 166 (LUMO+1) | 96 | 1  | 0  | 2  |
| -0.058        | 165 (LUMO)   | 2  | 95 | 0  | 3  |
| -0.194        | 164 (HOMO)   | 0  | 0  | 97 | 3  |
| -0.209        | 163 (HOMO-1) | 70 | 11 | 12 | 6  |
| -0.212        | 162 (HOMO-2) | 1  | 94 | 1  | 4  |
| -0.227        | 161 (HOMO-3) | 2  | 7  | 86 | 5  |
| -0.228        | 160 (HOMO-4) | 47 | 17 | 31 | 5  |
| -0.230        | 159 (HOMO-5) | 2  | 3  | 86 | 9  |

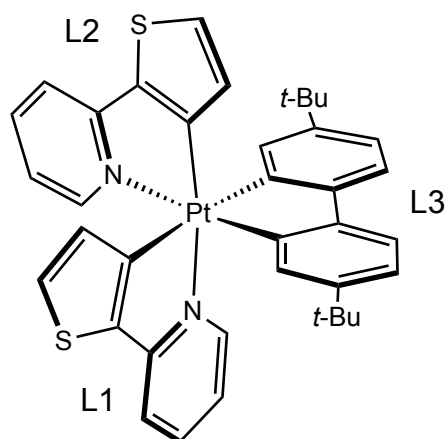

**Figure S28.** Ligand numbering in complex **2ca**.



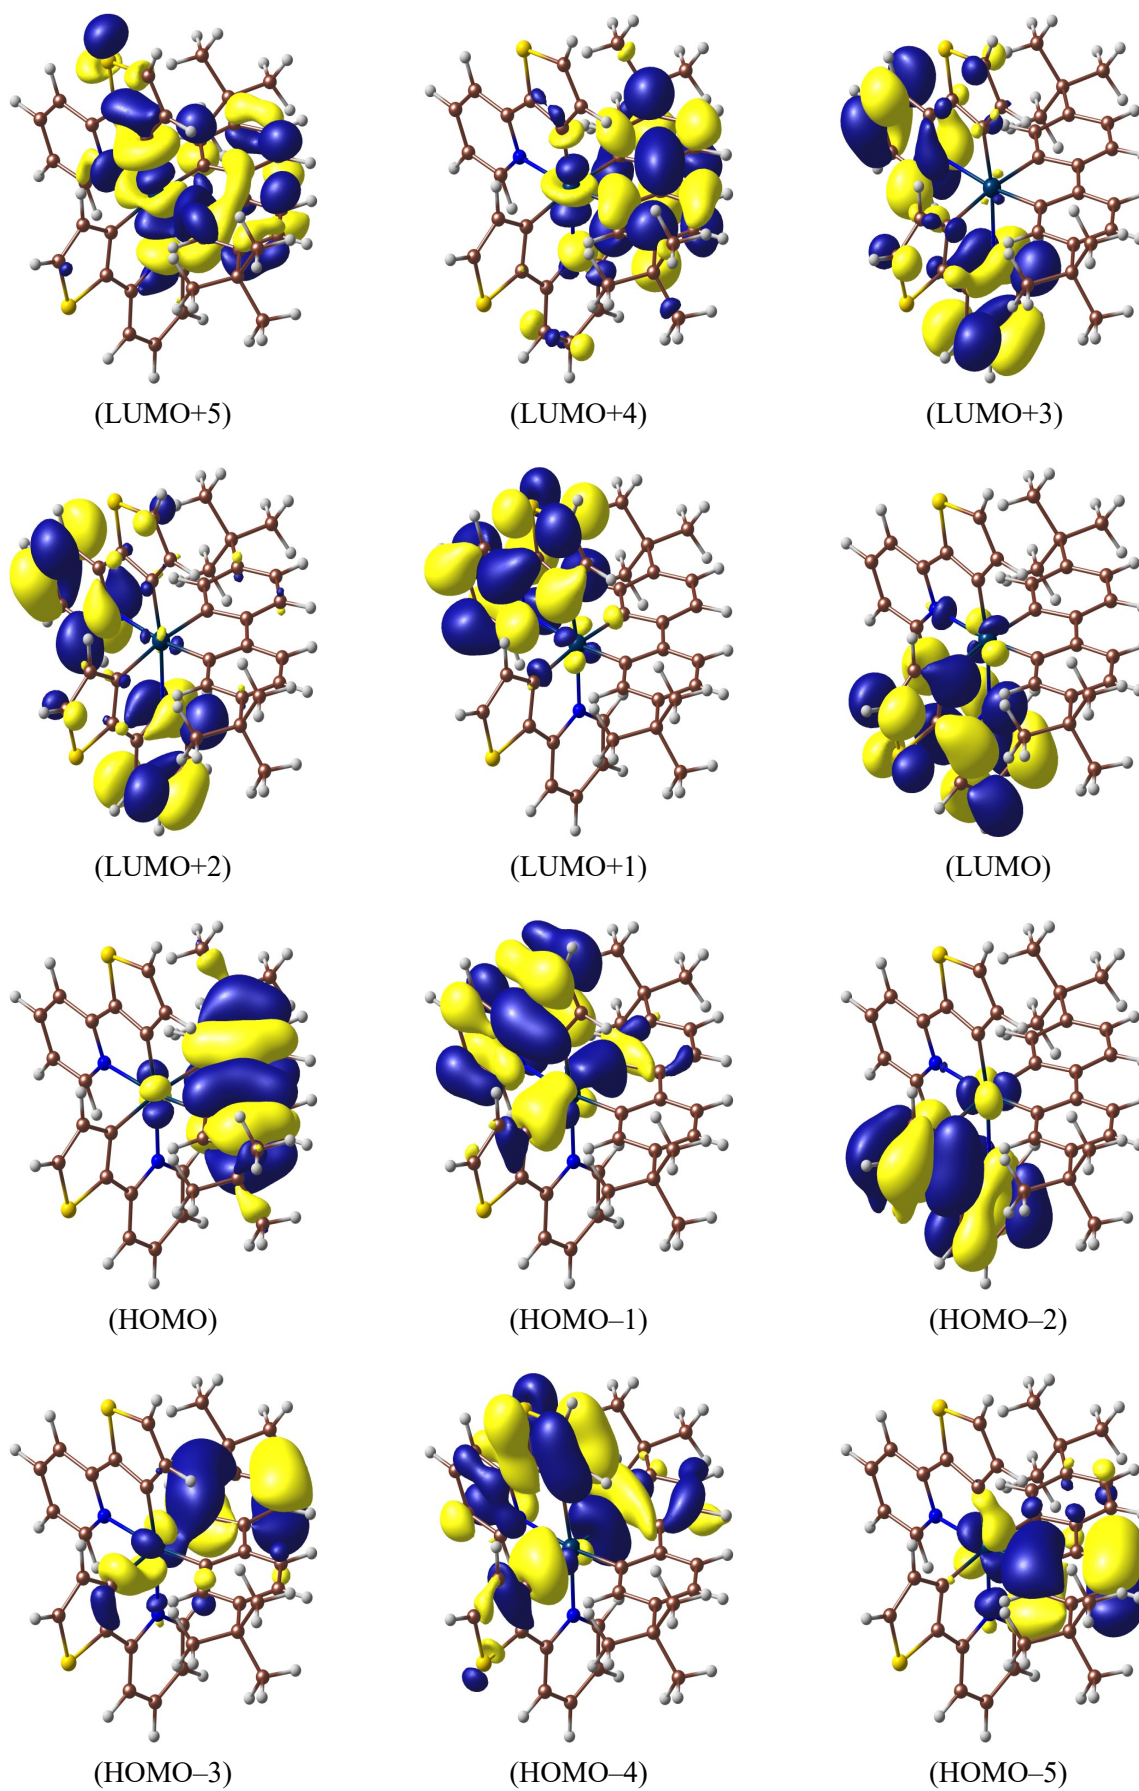

**Figure S29.** Molecular orbital isosurfaces of **2ca** ( $0.03 \text{ e bohr}^{-3}$ ).

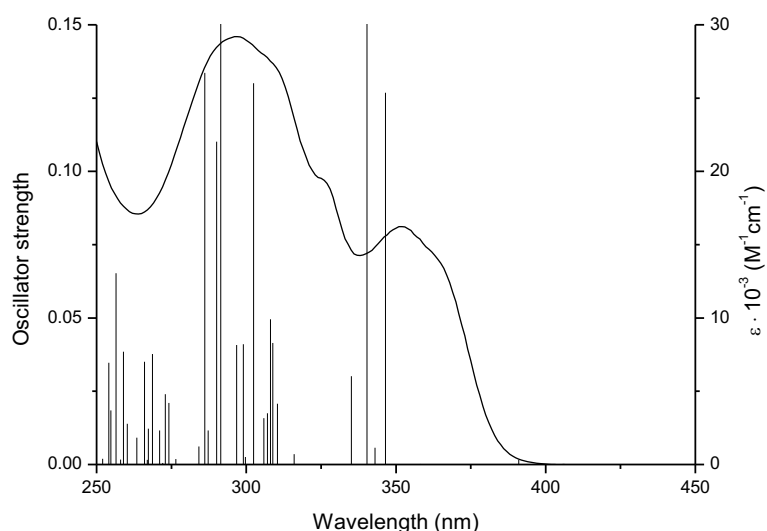

**Figure S30.** Calculated stick absorption spectrum of **2ca** compared with the experimental spectrum in  $\text{CH}_2\text{Cl}_2$  solution (*ca.*  $1 \times 10^{-5}$  M) at 298 K.

**Table S17.** Selected vertical singlet excitations of **2ca** from TDDFT calculations at the ground state geometry in  $\text{CH}_2\text{Cl}_2$  solution.

| state | monoexcitations <sup>a</sup>                                                          | $\Delta E/\text{eV}$ | $\lambda/\text{nm}$ | Oscillator strength | main character            |
|-------|---------------------------------------------------------------------------------------|----------------------|---------------------|---------------------|---------------------------|
| S4:   | H-4 → L+1 (3%)<br>H-2 → L (19%)<br>H-2 → L+1 (5%)<br>H-1 → L+1 (67%)                  | 3.581                | 346.2               | 0.1272              | LC(C <sup>^</sup> N)      |
| S6:   | H-2 → L (70%)<br>H-2 → L+2 (4%)<br>H-1 → L+1 (18%)                                    | 3.647                | 340.0               | 0.1753              | LC(C <sup>^</sup> N)      |
| S7:   | H → L+2 (92%)<br>H → L+3 (6%)                                                         | 3.703                | 334.8               | 0.0305              | LLCT                      |
| S12:  | H-5 → L (30%)<br>H-4 → L (8%)<br>H-4 → L+1 (16%)<br>H-1 → L+2 (38%)<br>H-1 → L+3 (2%) | 4.028                | 307.8               | 0.0499              | LC(C <sup>^</sup> N)/LLCT |
| S15:  | H-4 → L+1 (68%)<br>H-1 → L+1 (3%)<br>H-1 → L+2 (18%)                                  | 4.104                | 302.1               | 0.1304              | LC(C <sup>^</sup> N)      |
| S17:  | H-2 → L (3%)<br>H-2 → L+2 (88%)                                                       | 4.151                | 298.7               | 0.0414              | LC(C <sup>^</sup> N)/LLCT |
| S18:  | H-4 → L+1 (3%)<br>H-1 → L+3 (81%)<br>H-1 → L+4 (4%)<br>H-1 → L+5 (3%)                 | 4.182                | 296.5               | 0.0411              | LC(C <sup>^</sup> N)/LLCT |
| S19:  | H-3 → L+4 (4%)                                                                        | 4.258                | 291.2               | 0.2343              | LC(C <sup>^</sup> C)      |

|      |                                                                         |       |       |        |              |
|------|-------------------------------------------------------------------------|-------|-------|--------|--------------|
|      | H-2 -> L+3 (12%)<br>H-1 -> L+4 (2%)<br>H -> L+4 (18%)<br>H -> L+5 (53%) |       |       |        |              |
| S20: | H-6 -> L (8%)<br>H-2 -> L+3 (72%)<br>H -> L+4 (4%)<br>H -> L+5 (8%)     | 4.279 | 289.8 | 0.1105 | LC(C^N)/LLCT |

<sup>a</sup> H = HOMO; L = LUMO.

**Table S18.** Lowest-energy vertical triplet excitations of **2ca** from TDDFT calculations at the ground state geometry in CH<sub>2</sub>Cl<sub>2</sub> solution.

| state | monoexcitations <sup>a</sup>                                               | $\Delta E/eV$ | $\lambda/nm$ | main character |
|-------|----------------------------------------------------------------------------|---------------|--------------|----------------|
| T1:   | H-2 -> L (84%)<br>H-2 -> L+2 (3%)<br>H-2 -> L+3 (5%)                       | 2.494         | 497.2        | LC(C^N)        |
| T2:   | H-4 -> L+1 (12%)<br>H-1 -> L+1 (75%)<br>H-1 -> L+2 (3%)<br>H-1 -> L+3 (3%) | 2.522         | 491.6        | LC(C^N)        |
| T3:   | H -> L+2 (7%)<br>H -> L+4 (71%)<br>H -> L+5 (4%)                           | 2.888         | 429.4        | LC(C^C)        |

<sup>a</sup> H = HOMO; L = LUMO.

## 5.5. Complex 2cb

**Table S19.** Fragment contributions (%; from atomic orbital contributions) to the frontier orbitals of **2cb** in CH<sub>2</sub>Cl<sub>2</sub> solution.

| energy (a.u.) | number       | L1 | L2 | L3 | Pt |
|---------------|--------------|----|----|----|----|
| -0.013        | 138 (LUMO+5) | 25 | 9  | 42 | 24 |
| -0.025        | 137 (LUMO+4) | 3  | 10 | 79 | 7  |
| -0.034        | 136 (LUMO+3) | 51 | 46 | 1  | 2  |
| -0.039        | 135 (LUMO+2) | 46 | 46 | 6  | 2  |
| -0.058        | 134 (LUMO+1) | 96 | 1  | 0  | 2  |
| -0.059        | 133 (LUMO)   | 2  | 95 | 0  | 3  |
| -0.202        | 132 (HOMO)   | 0  | 0  | 95 | 4  |
| -0.211        | 131 (HOMO-1) | 72 | 11 | 11 | 6  |
| -0.212        | 130 (HOMO-2) | 2  | 93 | 1  | 4  |
| -0.230        | 129 (HOMO-3) | 44 | 24 | 28 | 5  |
| -0.231        | 128 (HOMO-4) | 5  | 2  | 87 | 6  |
| -0.233        | 127 (HOMO-5) | 1  | 3  | 87 | 8  |

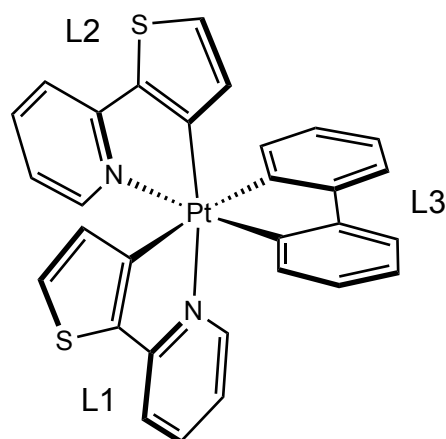

**Figure S31.** Ligand numbering in complex **2cb**.

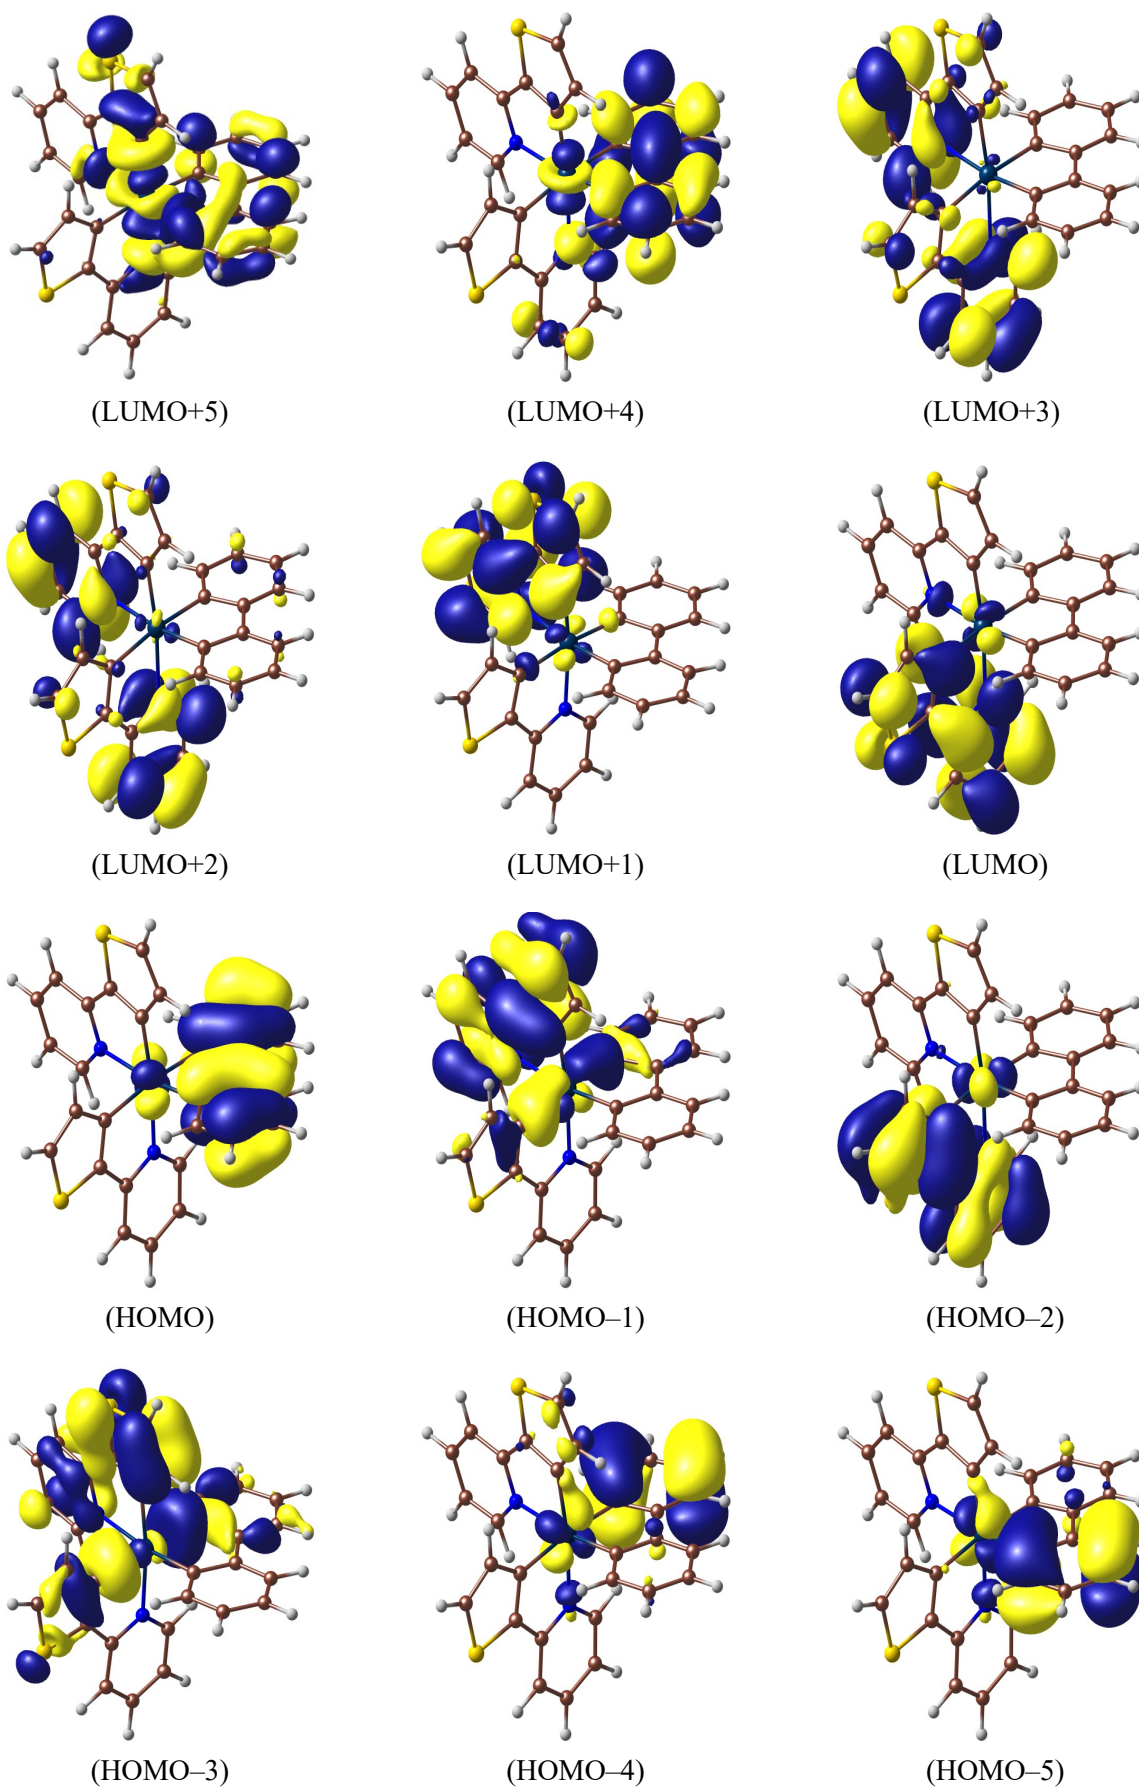

**Figure S32.** Molecular orbital isosurfaces of **2cb** ( $0.03 \text{ e bohr}^{-3}$ ).

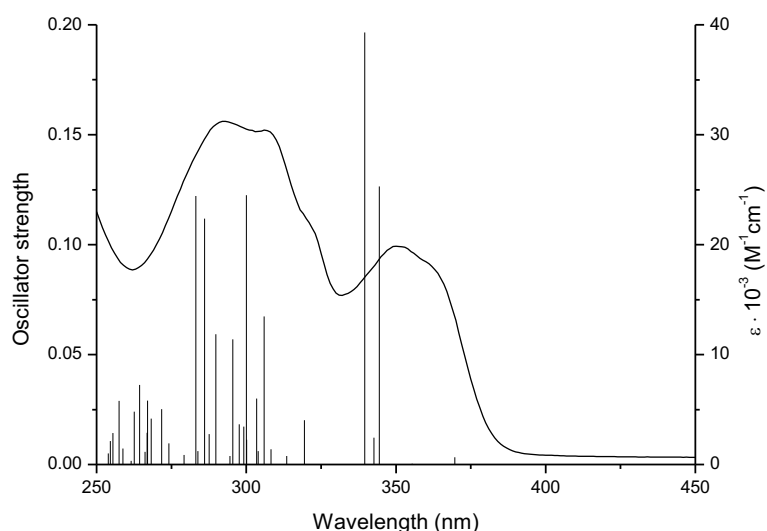

**Figure S33.** Calculated stick absorption spectrum of **2cb** compared with the experimental spectrum in  $\text{CH}_2\text{Cl}_2$  solution (*ca.*  $1 \times 10^{-5}$  M) at 298 K.

**Table S20.** Selected vertical singlet excitations of **2cb** from TDDFT calculations at the ground state geometry in  $\text{CH}_2\text{Cl}_2$  solution.

| state | monoexcitations <sup>a</sup>                                                                                                              | $\Delta E/\text{eV}$ | $\lambda/\text{nm}$ | oscillator strength | main character            |
|-------|-------------------------------------------------------------------------------------------------------------------------------------------|----------------------|---------------------|---------------------|---------------------------|
| S4:   | H-3 → L+1 (3%)<br>H-2 → L (30%)<br>H-2 → L+1 (12%)<br>H-1 → L+1 (48%)                                                                     | 3.602                | 344.2               | 0.1269              | LC(C <sup>∧</sup> N)      |
| S6:   | H-2 → L (57%)<br>H-2 → L+2 (4%)<br>H-1 → L+1 (31%)                                                                                        | 3.655                | 339.2               | 0.1969              | LC(C <sup>∧</sup> N)      |
| S10:  | H-3 → L+1 (27%)<br>H-1 → L+2 (57%)<br>H → L+3 (5%)                                                                                        | 4.056                | 305.7               | 0.0678              | LC(C <sup>∧</sup> N)/LLCT |
| S14:  | H-4 → L (5%)<br>H-4 → L+1 (33%)<br>H-3 → L+1 (19%)<br>H-2 → L+2 (11%)<br>H-1 → L+2 (5%)<br>H-1 → L+3 (4%)<br>H → L+4 (9%)<br>H → L+5 (5%) | 4.137                | 299.7               | 0.123               | LLCT                      |
| S17:  | H-5 → L+1 (7%)<br>H-4 → L+1 (3%)<br>H-3 → L+1 (2%)<br>H-1 → L+3 (68%)<br>H-1 → L+4 (7%)<br>H-1 → L+5 (4%)<br>H → L+4 (2%)                 | 4.201                | 295.1               | 0.0574              | LC(C <sup>∧</sup> N)/LLCT |

|      |                                                                                                              |       |       |        |              |
|------|--------------------------------------------------------------------------------------------------------------|-------|-------|--------|--------------|
| S19: | H-6 -> L (9%)<br>H-2 -> L+3 (82%)                                                                            | 4.283 | 289.5 | 0.0597 | LC(C^N)/LLCT |
| S21: | H-6 -> L (79%)<br>H-2 -> L+3 (10%)<br>H-1 -> L+4 (3%)                                                        | 4.339 | 285.8 | 0.1123 | LC(C^N)      |
| S23: | H-6 -> L+1 (8%)<br>H-5 -> L+4 (3%)<br>H-4 -> L+4 (4%)<br>H-1 -> L+4 (4%)<br>H -> L+4 (16%)<br>H -> L+5 (55%) | 4.383 | 282.9 | 0.1226 | LC(C^C)      |

<sup>a</sup> H = HOMO; L = LUMO.

**Table S21.** Lowest-energy vertical triplet excitations of **2cb** from TDDFT calculations at the ground state geometry in CH<sub>2</sub>Cl<sub>2</sub> solution.

| state | monoexcitations <sup>a</sup>                                                                 | $\Delta E/eV$ | $\lambda/nm$ | main character |
|-------|----------------------------------------------------------------------------------------------|---------------|--------------|----------------|
| T1:   | H-2 -> L (83%)<br>H-2 -> L+2 (3%)<br>H-2 -> L+3 (5%)<br>H-1 -> L (2%)                        | 2.495         | 496.9        | LC(C^N)        |
| T2:   | H-3 -> L+1 (9%)<br>H-2 -> L+1 (2%)<br>H-1 -> L+1 (75%)<br>H-1 -> L+2 (3%)<br>H-1 -> L+3 (3%) | 2.525         | 491.0        | LC(C^N)        |
| T3:   | H-8 -> L+13 (3%)<br>H -> L+2 (8%)<br>H -> L+4 (70%)<br>H -> L+5 (3%)                         | 2.945         | 421.0        | LC(C^C)        |

<sup>a</sup> H = HOMO; L = LUMO.

## 5.6. Complex 2cc

**Table S22.** Fragment contributions (%; from atomic orbital contributions) to the frontier orbitals of **2cc** in CH<sub>2</sub>Cl<sub>2</sub> solution.

| energy (a.u.) | number       | L1 | L2 | L3 | Pt |
|---------------|--------------|----|----|----|----|
| -0.018        | 146 (LUMO+5) | 15 | 6  | 62 | 16 |
| -0.025        | 145 (LUMO+4) | 8  | 11 | 67 | 14 |
| -0.036        | 144 (LUMO+3) | 48 | 49 | 1  | 2  |
| -0.041        | 143 (LUMO+2) | 49 | 45 | 4  | 2  |
| -0.060        | 142 (LUMO+1) | 96 | 1  | 0  | 2  |
| -0.061        | 141 (LUMO)   | 2  | 94 | 0  | 3  |
| -0.200        | 140 (HOMO)   | 0  | 0  | 97 | 2  |
| -0.213        | 139 (HOMO-1) | 74 | 13 | 8  | 5  |
| -0.214        | 138 (HOMO-2) | 5  | 90 | 1  | 4  |
| -0.233        | 137 (HOMO-3) | 48 | 23 | 24 | 4  |
| -0.240        | 136 (HOMO-4) | 2  | 3  | 86 | 8  |
| -0.241        | 135 (HOMO-5) | 2  | 26 | 63 | 9  |

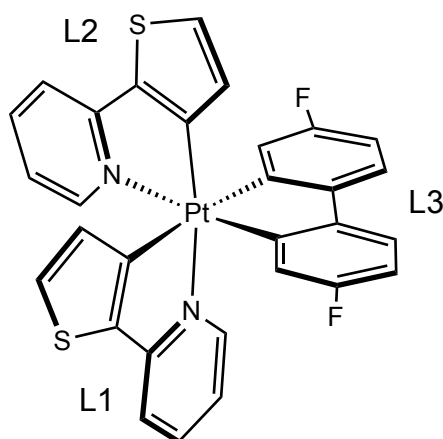

**Figure S34.** Ligand numbering in complex **2cc**.



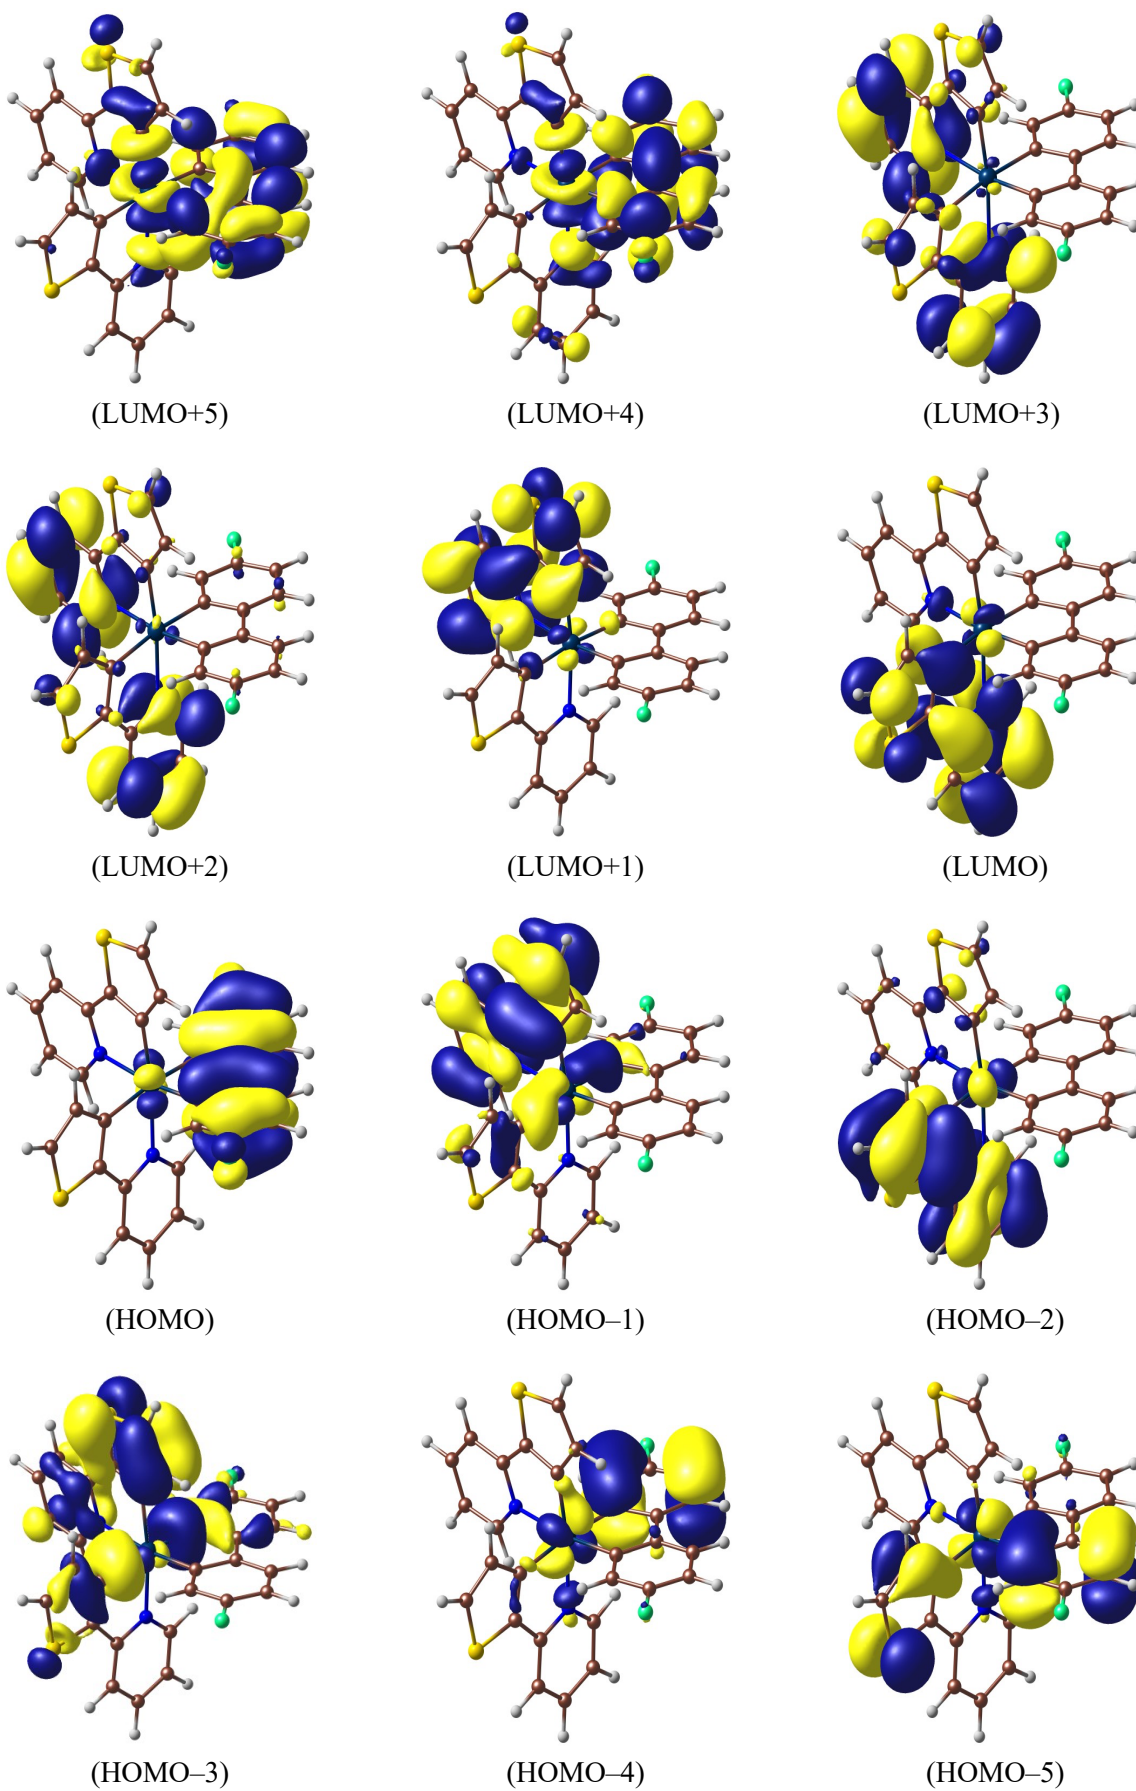

**Figure S35.** Molecular orbital isosurfaces of **2cc** ( $0.03 \text{ e bohr}^{-3}$ ).

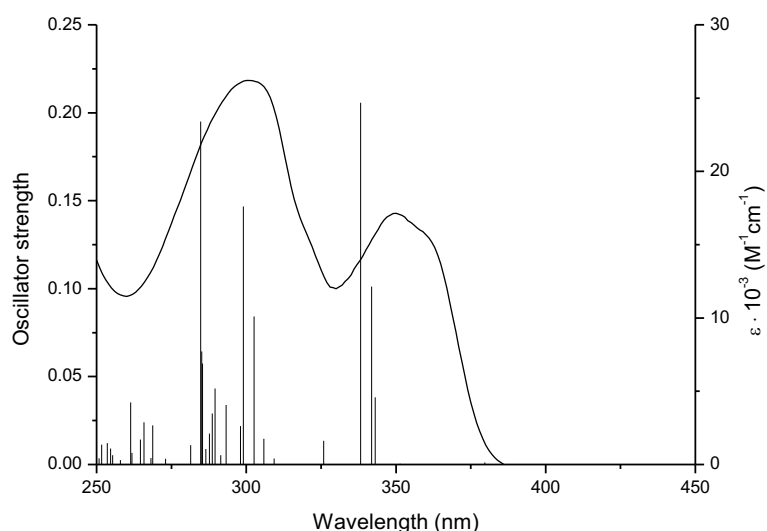

**Figure S36.** Calculated stick absorption spectrum of **2cc** compared with the experimental spectrum in  $\text{CH}_2\text{Cl}_2$  solution (*ca.*  $1 \times 10^{-5}$  M) at 298 K.

**Table S23.** Selected vertical singlet excitations of **2cc** from TDDFT calculations at the ground state geometry in  $\text{CH}_2\text{Cl}_2$  solution.

| state | monoexcitations <sup>a</sup>                                           | $\Delta E/\text{eV}$ | $\lambda/\text{nm}$ | Oscillator strength | main character            |
|-------|------------------------------------------------------------------------|----------------------|---------------------|---------------------|---------------------------|
| S4:   | H-2 → L (18%)<br>H-2 → L+1 (75%)<br>H-1 → L (2%)                       | 3.618                | 342.7               | 0.0388              | LLCT                      |
| S5:   | H-2 → L (36%)<br>H-2 → L+1 (19%)<br>H-1 → L+1 (36%)                    | 3.630                | 341.5               | 0.1018              | LC(C <sup>^</sup> N)/LLCT |
| S6:   | H-2 → L (32%)<br>H-2 → L+1 (4%)<br>H-2 → L+2 (4%)<br>H-1 → L+1 (53%)   | 3.669                | 337.9               | 0.2062              | LC(C <sup>^</sup> N)      |
| S7:   | H → L+2 (93%)<br>H → L+3 (6%)                                          | 3.809                | 325.5               | 0.0141              | LLCT                      |
| S11:  | H-3 → L+1 (24%)<br>H-1 → L+2 (63%)<br>H-1 → L+3 (3%)<br>H → L+4 (3%)   | 4.102                | 302.3               | 0.0848              | LC(C <sup>^</sup> N)/LLCT |
| S12:  | H-3 → L+1 (57%)<br>H-2 → L+2 (9%)<br>H-1 → L+1 (4%)<br>H-1 → L+2 (20%) | 4.151                | 298.7               | 0.1473              | LC(C <sup>^</sup> N)      |
| S14:  | H-1 → L+3 (64%)<br>H-1 → L+4 (16%)<br>H-1 → L+5 (7%)                   | 4.233                | 292.9               | 0.0344              | LC(C <sup>^</sup> N)/LLCT |
| S16:  | H-6 → L (4%)                                                           | 4.286                | 289.3               | 0.0437              | LLCT                      |

|      |                                                                                                              |       |       |        |         |
|------|--------------------------------------------------------------------------------------------------------------|-------|-------|--------|---------|
|      | H-4 -> L (2%)<br>H-4 -> L+1 (71%)<br>H-2 -> L+3 (16%)                                                        |       |       |        |         |
| S22: | H-6 -> L+1 (6%)<br>H-5 -> L+1 (5%)<br>H-4 -> L+4 (3%)<br>H-1 -> L+4 (3%)<br>H -> L+4 (20%)<br>H -> L+5 (48%) | 4.359 | 284.4 | 0.1956 | LC(C^C) |

<sup>a</sup> H = HOMO; L = LUMO.

**Table S24.** Lowest-energy vertical triplet excitations of **2cc** from TDDFT calculations at the ground state geometry in CH<sub>2</sub>Cl<sub>2</sub> solution.

| state | monoexcitations <sup>a</sup>                                                                 | $\Delta E/eV$ | $\lambda/nm$ | main character |
|-------|----------------------------------------------------------------------------------------------|---------------|--------------|----------------|
| T1:   | H-2 -> L (79%)<br>H-2 -> L+2 (3%)<br>H-2 -> L+3 (5%)<br>H-1 -> L (6%)                        | 2.498         | 496.4        | LC(C^N)        |
| T2:   | H-3 -> L+1 (7%)<br>H-2 -> L+1 (6%)<br>H-1 -> L+1 (75%)<br>H-1 -> L+2 (3%)<br>H-1 -> L+3 (3%) | 2.529         | 490.2        | LC(C^N)        |
| T3:   | H-4 -> L+8 (2%)<br>H -> L+2 (6%)<br>H -> L+4 (62%)<br>H -> L+5 (12%)                         | 2.960         | 418.8        | LC(C^C)        |

<sup>a</sup> H = HOMO; L = LUMO.

## 5.7. Spin densities

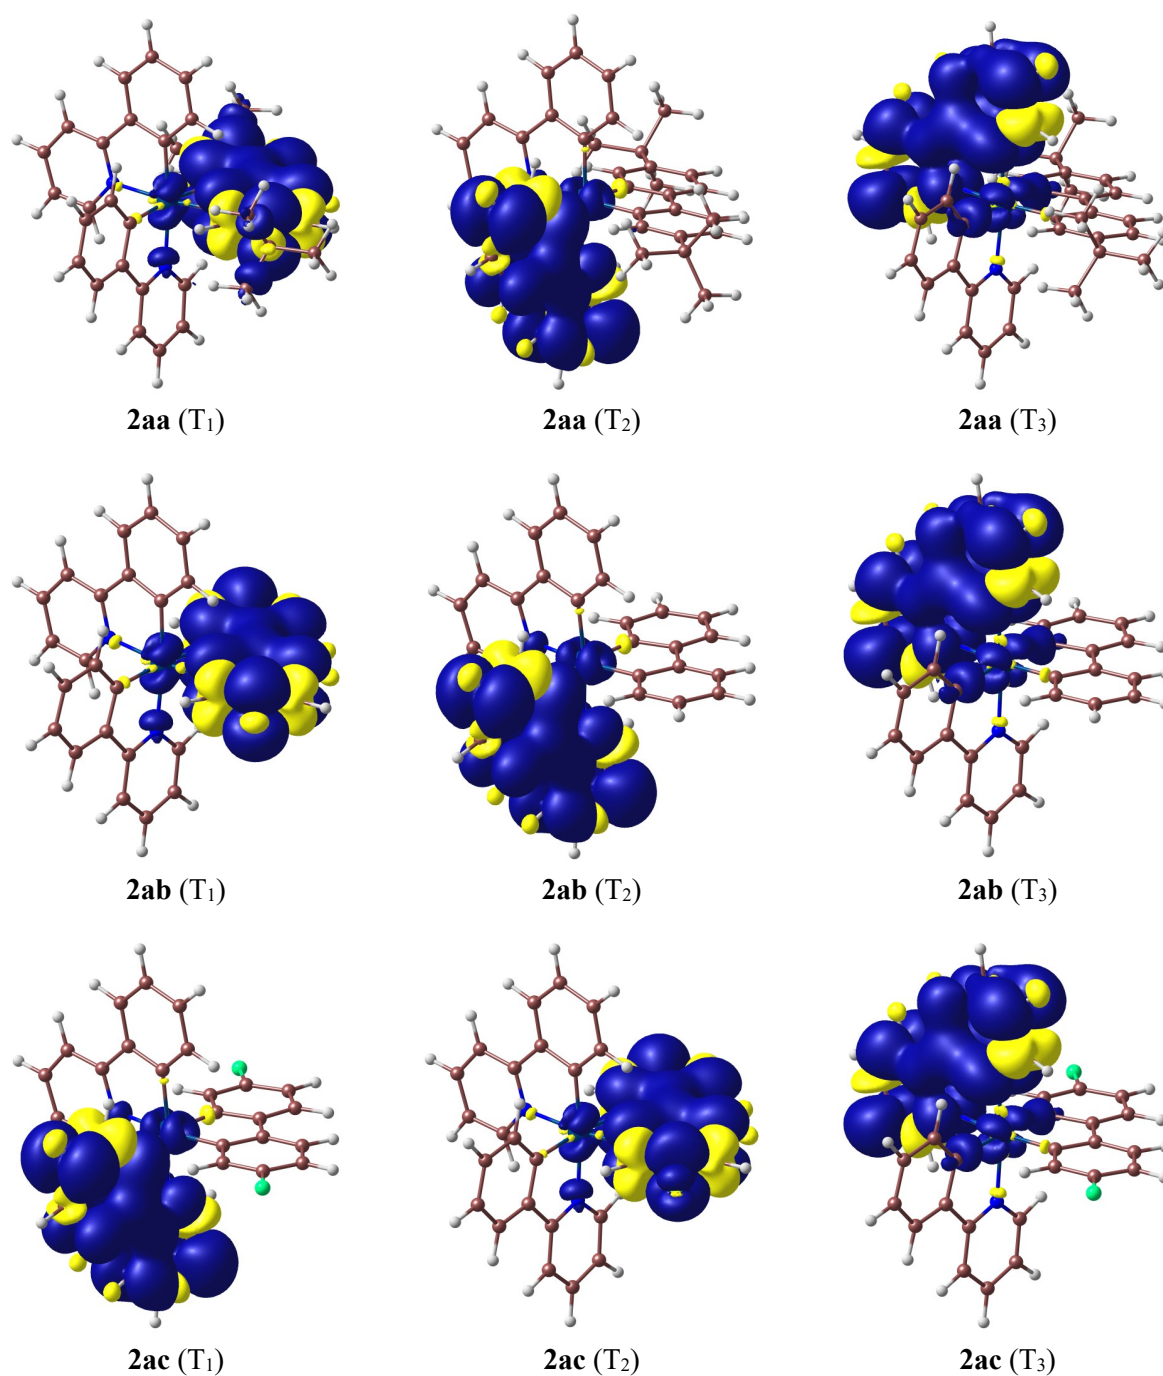

**Figure S37.** Spin density distributions (0.001 e bohr<sup>-3</sup>) for the lowest triplet excited states of complexes **2aa**, **2ab** and **2ac**.

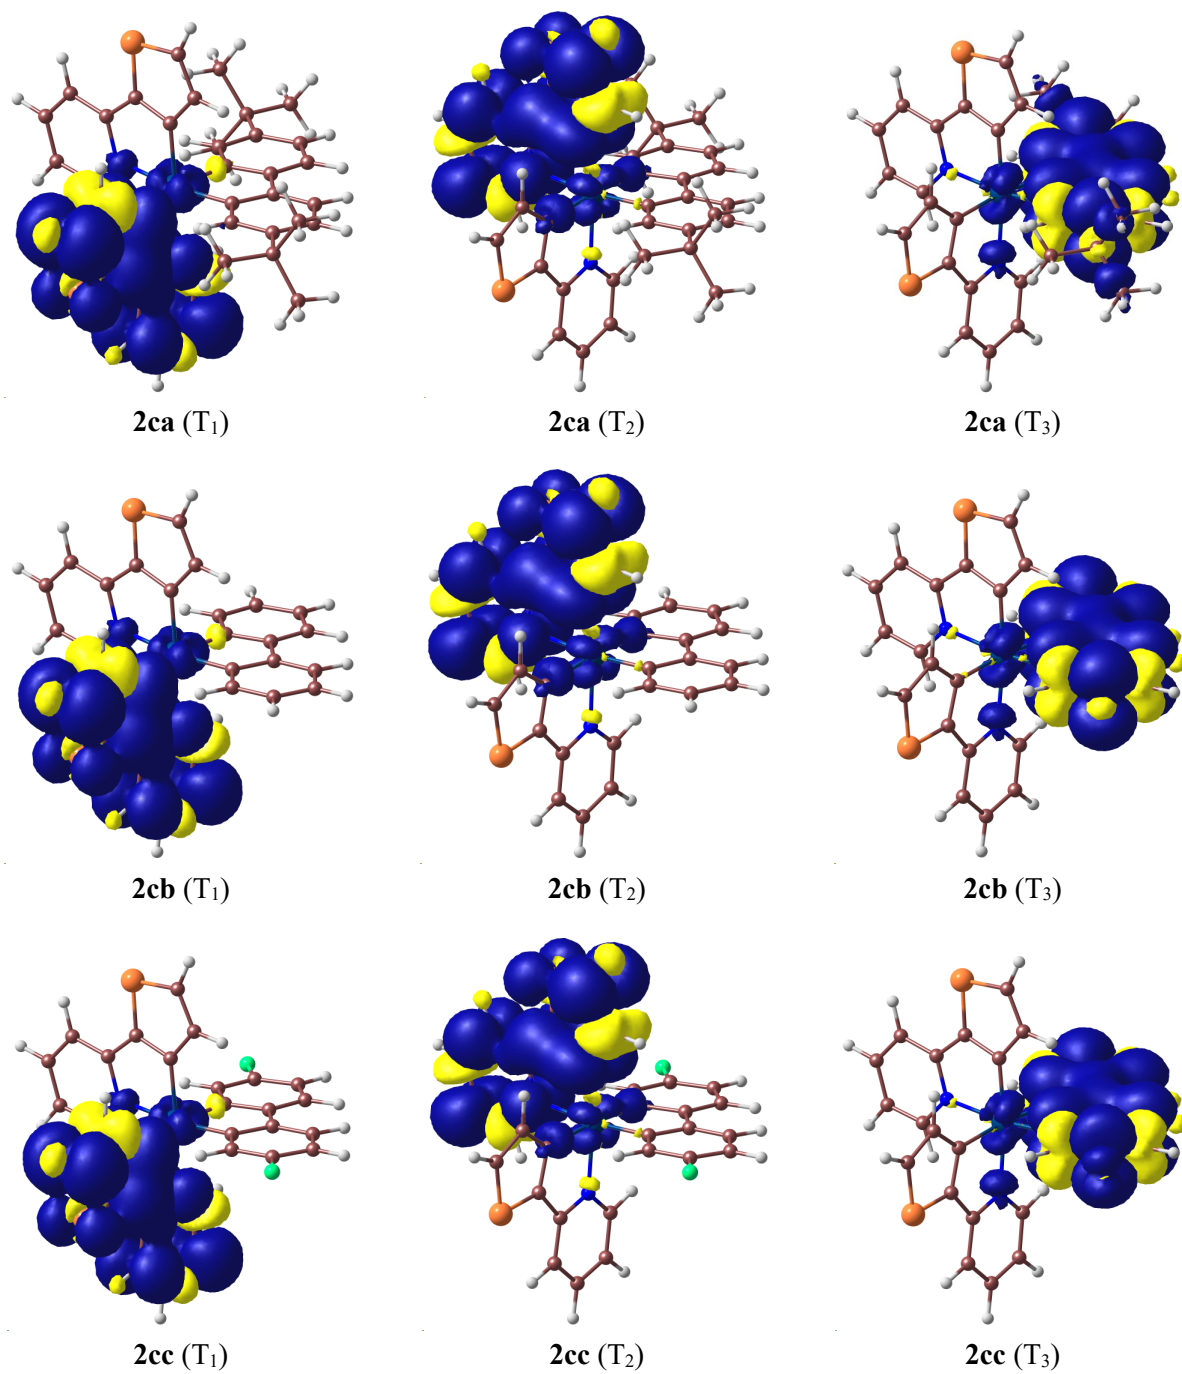

**Figure S38.** Spin density distributions ( $0.001 \text{ e bohr}^{-3}$ ) for the lowest triplet excited states of complexes **2ca**, **2cb** and **2cc**.

**Table S25.** Natural spin densities on the Pt atom for the lowest triplet excited states of complexes **2** (ppy and thpy derivatives).

| Complex    | State          | Involved ligand <sup>a</sup> | Spin density on Pt |
|------------|----------------|------------------------------|--------------------|
| <b>2aa</b> | T <sub>1</sub> | C^C                          | 0.0167             |
|            | T <sub>2</sub> | C^N-1                        | 0.0265             |
|            | T <sub>3</sub> | C^N-2                        | 0.0349             |
| <b>2ab</b> | T <sub>1</sub> | C^C                          | 0.0188             |
|            | T <sub>2</sub> | C^N-1                        | 0.0255             |
|            | T <sub>3</sub> | C^N-2                        | 0.0322             |
| <b>2ac</b> | T <sub>1</sub> | C^N-1                        | 0.0230             |
|            | T <sub>2</sub> | C^C                          | 0.0168             |
|            | T <sub>3</sub> | C^N-2                        | 0.0281             |
| <b>2ca</b> | T <sub>1</sub> | C^N-1                        | 0.0228             |
|            | T <sub>2</sub> | C^N-2                        | 0.0246             |
|            | T <sub>3</sub> | C^C                          | 0.0200             |
| <b>2cb</b> | T <sub>1</sub> | C^N-1                        | 0.0223             |
|            | T <sub>2</sub> | C^N-2                        | 0.0235             |
|            | T <sub>3</sub> | C^C                          | 0.0215             |
| <b>2cc</b> | T <sub>1</sub> | C^N-1                        | 0.0208             |
|            | T <sub>2</sub> | C^N-2                        | 0.0213             |
|            | T <sub>3</sub> | C^C                          | 0.0215             |

<sup>a</sup> See figure for ligand numeration.

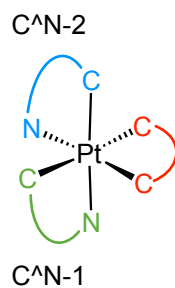

## 5.8. Supplementary computational data

**Table S26.** Energies, free energies, enthalpies and entropies of the optimized structures in CH<sub>2</sub>Cl<sub>2</sub> solution.<sup>a</sup>

| Structure             | E <sub>0</sub> <sup>b</sup> | ZPE <sup>c</sup> | G <sup>d</sup> | H <sup>e</sup> | S <sup>f</sup> |
|-----------------------|-----------------------------|------------------|----------------|----------------|----------------|
| 2aa (S <sub>0</sub> ) | -1853.327077                | -1852.621434     | -1852.694237   | -1852.580303   | 239.793        |
| 2aa (T <sub>1</sub> ) | -1853.224788                | -1852.523787     | -1852.598844   | -1852.481913   | 246.103        |
| 2aa (T <sub>2</sub> ) | -1853.223010                | -1852.522242     | -1852.597497   | -1852.480319   | 246.621        |
| 2aa (T <sub>3</sub> ) | -1853.222399                | -1852.521494     | -1852.596239   | -1852.479630   | 245.425        |
| 2ab (S <sub>0</sub> ) | -1538.801482                | -1538.320320     | -1538.379900   | -1538.290568   | 188.014        |
| 2ab (T <sub>1</sub> ) | -1538.697214                | -1538.220954     | -1538.282534   | -1538.190458   | 193.789        |
| 2ab (T <sub>2</sub> ) | -1538.697391                | -1538.221068     | -1538.282831   | -1538.190550   | 194.222        |
| 2ab (T <sub>3</sub> ) | -1538.696663                | -1538.220212     | -1538.281696   | -1538.189743   | 193.533        |
| 2ac (S <sub>0</sub> ) | -1737.267245                | -1736.802667     | -1736.864667   | -1736.771109   | 196.910        |
| 2ac (T <sub>1</sub> ) | -1737.163096                | -1736.703309     | -1736.767330   | -1736.671010   | 202.721        |
| 2ac (T <sub>2</sub> ) | -1737.162589                | -1736.702936     | -1736.767182   | -1736.670505   | 203.474        |
| 2ac (T <sub>3</sub> ) | -1737.162255                | -1736.702388     | -1736.766232   | -1736.670126   | 202.272        |
| 2ca (S <sub>0</sub> ) | -2494.832350                | -2494.194017     | -2494.266868   | -2494.153317   | 238.987        |
| 2ca (T <sub>1</sub> ) | -2494.746407                | -2494.112052     | -2494.186630   | -2494.070683   | 244.031        |
| 2ca (T <sub>2</sub> ) | -2494.745436                | -2494.111084     | -2494.185702   | -2494.069696   | 244.155        |
| 2ca (T <sub>3</sub> ) | -2494.730039                | -2494.096397     | -2494.171547   | -2494.054915   | 245.472        |
| 2cb (S <sub>0</sub> ) | -2180.306685                | -2179.892808     | -2179.952322   | -2179.863503   | 186.936        |
| 2cb (T <sub>1</sub> ) | -2180.220695                | -2179.810796     | -2179.872039   | -2179.780821   | 191.984        |
| 2cb (T <sub>2</sub> ) | -2180.219677                | -2179.809816     | -2179.871164   | -2179.779810   | 192.272        |
| 2cb (T <sub>3</sub> ) | -2180.202321                | -2179.793356     | -2179.854825   | -2179.763295   | 192.641        |
| 2cc (S <sub>0</sub> ) | -2378.771947                | -2378.374642     | -2378.436526   | -2378.343547   | 195.690        |
| 2cc (T <sub>1</sub> ) | -2378.685888                | -2378.292550     | -2378.356151   | -2378.260788   | 200.708        |
| 2cc (T <sub>2</sub> ) | -2378.684821                | -2378.291536     | -2378.355250   | -2378.259740   | 201.016        |
| 2cc (T <sub>3</sub> ) | -2378.667279                | -2378.274941     | -2378.339099   | -2378.242940   | 202.384        |

<sup>a</sup> Thermal corrections from vibrational calculations at 298.15 K. <sup>b</sup> Electronic energy (Hartrees). <sup>c</sup> Sum of electronic and zero-point energies (Hartrees). <sup>d</sup> Free Energy (Hartrees). <sup>e</sup> Enthalpy (Hartrees). <sup>f</sup> Entropy (cal mol<sup>-1</sup> K<sup>-1</sup>).

**Table S27.** Cartesian coordinates (Å) of the optimized structures at the B3LYP(6-31G\*\*+LANL2DZ) level in CH<sub>2</sub>Cl<sub>2</sub> solution.

|                       |              |              |              |   |              |              |              |
|-----------------------|--------------|--------------|--------------|---|--------------|--------------|--------------|
| 2aa (S <sub>0</sub> ) |              |              |              | C | -2.576146060 | 0.475952030  | 0.071119592  |
| Pt                    | -0.521953696 | -0.011695575 | 0.177410158  | C | -3.313577930 | 1.311219291  | 0.920692926  |
| C                     | -0.075123501 | 1.180723461  | 1.743365848  | C | -4.674856066 | 1.554795837  | 0.713467433  |
| C                     | -0.097387839 | 0.826229501  | 3.097818941  | C | -5.338268173 | 0.961963285  | -0.365314828 |
| C                     | 0.216758994  | 1.756414290  | 4.091260139  | C | -4.633500557 | 0.128944062  | -1.229289624 |
| C                     | 0.563410117  | 3.067688038  | 3.751279219  | C | -3.263527166 | -0.117987388 | -1.019174394 |
| C                     | 0.591598696  | 3.441137127  | 2.412248420  | C | -2.486679687 | -1.000248296 | -1.910708728 |
| C                     | 0.276045579  | 2.513831507  | 1.402335469  | C | -3.010414412 | -1.692276785 | -3.015263019 |
| C                     | 0.286241819  | 2.871661761  | -0.023379453 | C | -2.184829994 | -2.499278297 | -3.788274429 |
| C                     | 0.610918417  | 4.135507088  | -0.542698252 | C | -0.833127427 | -2.617287765 | -3.456820237 |
| C                     | 0.580725722  | 4.349055545  | -1.914916925 | C | -0.366465518 | -1.914475639 | -2.353631525 |
| C                     | 0.224691145  | 3.299538842  | -2.766435346 | H | -2.820590441 | 1.780320835  | 1.768409431  |
| C                     | -0.087214197 | 2.071806640  | -2.197485056 | H | -5.220122203 | 2.206295201  | 1.392399579  |
| H                     | -0.363546069 | -0.185328356 | 3.382019588  | H | -6.395163941 | 1.148286076  | -0.532393572 |
| H                     | 0.191555109  | 1.455221051  | 5.135371529  | H | -5.159846400 | -0.323098480 | -2.064785585 |
| H                     | 0.808785480  | 3.790967290  | 4.523004114  | H | -4.060366533 | -1.600681945 | -3.263869411 |
| H                     | 0.859357071  | 4.461541880  | 2.155844940  | H | -2.592344006 | -3.033884671 | -4.640720344 |
| H                     | 0.885025088  | 4.943181047  | 0.124584040  | H | -0.155845504 | -3.237978086 | -4.031979010 |
| H                     | 0.831802102  | 5.324921264  | -2.318508951 | H | 0.668966553  | -1.964251782 | -2.036048349 |
| H                     | 0.188161926  | 3.425350103  | -3.842352020 | N | -1.165575778 | -1.131371380 | -1.610519911 |
| H                     | -0.372154991 | 1.219925568  | -2.804910623 | C | -0.777969906 | -1.711152442 | 1.281271832  |
| N                     | -0.054583901 | 1.867277188  | -0.871934862 | C | -1.977792120 | -2.150325446 | 1.835365625  |

|   |              |              |              |   |              |              |              |
|---|--------------|--------------|--------------|---|--------------|--------------|--------------|
| C | -2.074388924 | -3.352011259 | 2.569130445  | H | 0.826200131  | 3.799091643  | 4.537885403  |
| C | -0.904978881 | -4.105716742 | 2.728164348  | H | 0.870017992  | 4.478872461  | 2.173218797  |
| C | 0.307779580  | -3.679909136 | 2.180471642  | H | 0.888429476  | 4.967269481  | 0.141770425  |
| C | 0.396459729  | -2.486367256 | 1.454739336  | H | 0.825559038  | 5.356999513  | -2.299838689 |
| C | 1.624175885  | -1.946920475 | 0.844499123  | H | 0.169203919  | 3.464530075  | -3.827094496 |
| C | 2.886921534  | -2.556619912 | 0.885775583  | H | -0.392581347 | 1.256639071  | -2.793879077 |
| C | 3.983186073  | -1.955304156 | 0.271458284  | N | -0.062419617 | 1.896617108  | -0.861005865 |
| C | 3.862708109  | -0.728035254 | -0.403927442 | C | -2.584749006 | 0.495881205  | 0.075524341  |
| C | 2.587795924  | -0.132135157 | -0.435947337 | C | -3.321687905 | 1.334188303  | 0.922344504  |
| H | -2.866228481 | -1.544363488 | 1.698963352  | C | -4.684564648 | 1.572689182  | 0.719004521  |
| H | -0.922253517 | -5.037415629 | 3.282566043  | C | -5.350269860 | 0.970199384  | -0.352777146 |
| H | 1.192778209  | -4.293870476 | 2.328547655  | C | -4.646074660 | 0.133476718  | -1.213861959 |
| H | 3.026837824  | -3.506044712 | 1.397602507  | C | -3.274298796 | -0.107397787 | -1.008589156 |
| H | 4.947291680  | -2.453818881 | 0.323947314  | C | -2.499434272 | -0.991407199 | -1.901456461 |
| H | 2.464629760  | 0.816245815  | -0.948031847 | C | -3.028193825 | -1.697450858 | -2.994698424 |
| C | 5.101814908  | -0.094902411 | -1.066157000 | C | -2.202318016 | -2.505810889 | -3.767205036 |
| C | 1.469574471  | -0.715235319 | 0.170387812  | C | -0.845981999 | -2.606991871 | -3.450113312 |
| C | 6.184559862  | 0.167320942  | 0.008381844  | C | -0.374154189 | -1.885565030 | -2.360498399 |
| H | 6.489874603  | -0.755309346 | 0.510876104  | H | -2.826745260 | 1.809945871  | 1.765267272  |
| H | 7.077426611  | 0.610455382  | -0.448048389 | H | -5.228992187 | 2.227291182  | 1.395642064  |
| H | 5.815644261  | 0.858978561  | 0.773347035  | H | -6.408480475 | 1.151789377  | -0.516922553 |
| C | 5.669450367  | -1.061857450 | -2.133109501 | H | -5.174493074 | -0.326359692 | -2.043794213 |
| H | 6.557651466  | -0.629168058 | -2.608223615 | H | -4.080934197 | -1.616768981 | -3.235320622 |
| H | 5.959137392  | -2.022769281 | -1.697547057 | H | -2.613795005 | -3.053811772 | -4.609244199 |
| H | 4.928545322  | -1.258558465 | -2.915703802 | H | -0.169391221 | -3.227432272 | -4.026527542 |
| C | 4.782790550  | 1.244448568  | -1.757774688 | H | 0.667420630  | -1.911764595 | -2.058378179 |
| H | 4.041437788  | 1.125567528  | -2.554925438 | N | -1.174582227 | -1.106528863 | -1.616077722 |
| H | 4.404516512  | 1.988796970  | -1.049502183 | C | -0.792353251 | -1.674900059 | 1.281679944  |
| H | 5.693472421  | 1.650731423  | -2.210694019 | C | -1.968234349 | -2.129802836 | 1.817897738  |
| C | -3.434592099 | -3.778637693 | 3.152405902  | C | -2.059216698 | -3.351948821 | 2.568854384  |
| C | -3.350383309 | -5.110987137 | 3.921556334  | C | -0.855413398 | -4.090780746 | 2.767192583  |
| H | -4.338139772 | -5.372035714 | 4.315816695  | C | 0.347816743  | -3.673096524 | 2.258223465  |
| H | -3.023583622 | -5.933580407 | 3.276785892  | C | 0.446268299  | -2.445940178 | 1.478865061  |
| H | -2.661231978 | -5.048464109 | 4.770271904  | C | 1.600940575  | -1.940004721 | 0.903495719  |
| C | -3.943961371 | -2.691033028 | 4.128662313  | C | 2.922495401  | -2.546658240 | 0.964346255  |
| H | -3.244005807 | -2.553881097 | 4.959975894  | C | 3.982053015  | -1.956212484 | 0.334115370  |
| H | -4.067454021 | -1.724687923 | 3.630999003  | C | 3.855835102  | -0.728043377 | -0.400169457 |
| H | -4.915551660 | -2.978263687 | 4.547303515  | C | 2.559519988  | -0.127019118 | -0.449199232 |
| C | -4.458193093 | -3.950209181 | 2.004058151  | H | -2.869623121 | -1.545593005 | 1.672432066  |
| H | -4.592742192 | -3.023483222 | 1.438464982  | H | -0.882485180 | -5.012733506 | 3.338275024  |
| H | -4.131972179 | -4.726662254 | 1.303572790  | H | 1.241004396  | -4.263062602 | 2.440064098  |
| H | -5.435789613 | -4.243472804 | 2.404187129  | H | 3.069757190  | -3.474396547 | 1.509723884  |

## 2aa (T<sub>1</sub>)

$\langle S^2 \rangle = 2.033636$

|    |              |              |              |   |              |              |              |
|----|--------------|--------------|--------------|---|--------------|--------------|--------------|
| Pt | -0.527272792 | 0.015975358  | 0.184935710  | C | 5.089894370  | -0.128804497 | -1.082150398 |
| C  | -0.075969603 | 1.203110913  | 1.752901516  | C | 1.454409521  | -0.678195240 | 0.160684141  |
| C  | -0.090049618 | 0.841107123  | 3.105151644  | C | 6.182145544  | 0.163185872  | -0.021348933 |
| C  | 0.230365158  | 1.767052525  | 4.101045653  | H | 6.480218124  | -0.741523273 | 0.516884829  |
| C  | 0.576099412  | 3.079312575  | 3.764365497  | H | 7.077938485  | 0.576353724  | -0.499926460 |
| C  | 0.599552277  | 3.458462417  | 2.426682116  | H | 5.824643872  | 0.889892847  | 0.715830913  |
| C  | 0.277873721  | 2.535838851  | 1.414207243  | C | 5.652320053  | -1.135789264 | -2.118316779 |
| C  | 0.284352814  | 2.897431666  | -0.010419322 | H | 6.546961186  | -0.726387968 | -2.602254755 |
| C  | 0.609518410  | 4.162471987  | -0.527007062 | H | 5.931288540  | -2.085975265 | -1.653046991 |
| C  | 0.573670747  | 4.380466972  | -1.898314958 | H | 4.912112013  | -1.347978128 | -2.897317480 |
| C  | 0.210445373  | 3.334884194  | -2.751812491 | C | 4.777996527  | 1.188352070  | -1.818591325 |
| C  | -0.101938496 | 2.105874616  | -2.185534112 | H | 4.033604986  | 1.046645123  | -2.609035939 |
| H  | -0.355286929 | -0.171649823 | 3.385743657  | H | 4.406382947  | 1.958546373  | -1.134912253 |
| H  | 0.210791073  | 1.461461406  | 5.143969887  | H | 5.689866343  | 1.573171856  | -2.287466678 |
|    |              |              |              | C | -3.418956785 | -3.800195385 | 3.113436628  |



|   |              |              |             |   |               |               |               |
|---|--------------|--------------|-------------|---|---------------|---------------|---------------|
| C | -3.336014511 | -5.130850869 | 3.886307758 | C | -0.9050458944 | -4.1060236243 | 2.7322679107  |
| H | -4.330695074 | -5.408065170 | 4.250896695 | C | 0.3093347244  | -3.6799650028 | 2.18838044    |
| H | -2.976467061 | -5.948211999 | 3.252360484 | C | 0.4004106435  | -2.4860513491 | 1.4636261742  |
| H | -2.674358135 | -5.056687614 | 4.755733103 | C | 1.6279261259  | -1.9472371629 | 0.8533396987  |
| C | -3.976716336 | -2.719717441 | 4.075095255 | C | 2.8912217958  | -2.5554769074 | 0.8971908732  |
| H | -3.307601297 | -2.576516606 | 4.930303762 | C | 3.9871084796  | -1.9545878757 | 0.2819459889  |
| H | -4.095488101 | -1.753737473 | 3.575676786 | C | 3.8654487326  | -0.7291643548 | -0.3965871003 |
| H | -4.958692613 | -3.020890994 | 4.458625754 | C | 2.5900067981  | -0.1346242865 | -0.4309912306 |
| C | -4.412736910 | -3.988605515 | 1.938484056 | H | -2.8621327731 | -1.5412945388 | 1.7027006693  |
| H | -4.542510942 | -3.066517477 | 1.364409827 | H | -0.9240168824 | -5.0382433758 | 3.2856833383  |
| H | -4.060621257 | -4.765747555 | 1.251600758 | H | 1.193630595   | -4.2946399631 | 2.3375362818  |
| H | -5.397060083 | -4.289463758 | 2.316253169 | H | 3.0316588243  | -3.5033463353 | 1.4117331324  |

### 2aa (T<sub>2</sub>)

$\langle S^2 \rangle = 2.030253$

|    |               |               |               |
|----|---------------|---------------|---------------|
| Pt | -0.5182075951 | -0.0130363119 | 0.1848706926  |
| C  | -0.0682889884 | 1.1901737137  | 1.747325974   |
| C  | -0.0905403263 | 0.8438853089  | 3.1038374976  |
| C  | 0.226044274   | 1.778290284   | 4.0927006436  |
| C  | 0.5748592221  | 3.0869261734  | 3.7453050212  |
| C  | 0.6028295119  | 3.4530984659  | 2.404108384   |
| C  | 0.285119701   | 2.5210527296  | 1.3992012091  |
| C  | 0.2971858371  | 2.8737271495  | -0.0287986203 |
| C  | 0.6247437438  | 4.1351522267  | -0.5524312468 |
| C  | 0.5965266663  | 4.3433397567  | -1.9257616363 |
| C  | 0.2410884349  | 3.2912771082  | -2.7743434073 |
| C  | -0.0721322135 | 2.0656109311  | -2.2010805122 |
| H  | -0.3587543102 | -0.165821521  | 3.393505224   |
| H  | 0.2009253287  | 1.482811964   | 5.1384719398  |
| H  | 0.8220766473  | 3.814040458   | 4.5128660732  |
| H  | 0.8722076472  | 4.4717918413  | 2.1425934279  |
| H  | 0.8997891427  | 4.9451789515  | 0.1116220797  |
| H  | 0.8493603566  | 5.3174797853  | -2.3324952238 |
| H  | 0.2066346257  | 3.4135863542  | -3.8507627074 |
| H  | -0.3551713922 | 1.2093473585  | -2.8035636377 |
| N  | -0.0429046813 | 1.8676540939  | -0.8749939369 |
| C  | -2.5578685108 | 0.4797487723  | 0.1002087555  |
| C  | -3.2988694771 | 1.2970944319  | 0.9326419447  |
| C  | -4.6764013843 | 1.5318709435  | 0.7326300416  |
| C  | -5.3548642254 | 0.9056169972  | -0.3608280319 |
| C  | -4.6879395249 | 0.0859925351  | -1.2250406219 |
| C  | -3.2622752132 | -0.1612153319 | -1.0464679496 |
| C  | -2.5194358939 | -0.9733619451 | -1.9025645683 |
| C  | -3.0388931643 | -1.6770819904 | -3.0541385403 |
| C  | -2.2250636035 | -2.4664849479 | -3.8220268779 |
| C  | -0.8519867881 | -2.5914924346 | -3.4730126631 |
| C  | -0.375876221  | -1.8906603792 | -2.3509923914 |
| H  | -2.8111652141 | 1.7748836618  | 1.7785866897  |
| H  | -5.2284936199 | 2.1815184625  | 1.4049441278  |
| H  | -6.4168863494 | 1.0877692409  | -0.5009746842 |
| H  | -5.223923004  | -0.3798258654 | -2.0444776793 |
| H  | -4.0878797188 | -1.5738889518 | -3.3046230763 |
| H  | -2.6210966125 | -2.9927079761 | -4.6842494582 |
| H  | -0.1714606751 | -3.2086654452 | -4.047067403  |
| H  | 0.6656807887  | -1.962681377  | -2.0526370177 |
| N  | -1.137621075  | -1.112603761  | -1.5992761026 |
| C  | -0.7732856549 | -1.7105149504 | 1.2890228741  |
| C  | -1.974963841  | -2.1499097154 | 1.8386749391  |
| C  | -2.074224184  | -3.3525080737 | 2.5703369383  |

|   |               |               |               |
|---|---------------|---------------|---------------|
| C | -0.9050458944 | -4.1060236243 | 2.7322679107  |
| C | 0.3093347244  | -3.6799650028 | 2.18838044    |
| C | 0.4004106435  | -2.4860513491 | 1.4636261742  |
| C | 1.6279261259  | -1.9472371629 | 0.8533396987  |
| C | 2.8912217958  | -2.5554769074 | 0.8971908732  |
| C | 3.9871084796  | -1.9545878757 | 0.2819459889  |
| C | 3.8654487326  | -0.7291643548 | -0.3965871003 |
| C | 2.5900067981  | -0.1346242865 | -0.4309912306 |
| H | -2.8621327731 | -1.5412945388 | 1.7027006693  |
| H | -0.9240168824 | -5.0382433758 | 3.2856833383  |
| H | 1.193630595   | -4.2946399631 | 2.3375362818  |
| H | 3.0316588243  | -3.5033463353 | 1.4117331324  |
| H | 4.9517830703  | -2.4517768419 | 0.3362719228  |
| H | 2.4661200475  | 0.8120985916  | -0.9457315566 |
| C | 5.1042142113  | -0.0961872389 | -1.0596191687 |
| C | 1.4721299136  | -0.7174486316 | 0.176153552   |
| C | 6.1858667379  | 0.1700401633  | 0.0150428633  |
| H | 6.49197411    | -0.7509408608 | 0.5200782317  |
| H | 7.0785114101  | 0.6131376405  | -0.4418543078 |
| H | 5.8155339615  | 0.8631759308  | 0.777995801   |
| C | 5.6737179151  | -1.0651278453 | -2.1237610738 |
| H | 6.5617073941  | -0.6325400556 | -2.5993632666 |
| H | 5.9642847483  | -2.0245899524 | -1.6855995877 |
| H | 4.9335583571  | -1.2646914755 | -2.9063209547 |
| C | 4.7840669962  | 1.2410634479  | -1.7547702512 |
| H | 4.0433834432  | 1.1193397625  | -2.5521001102 |
| H | 4.404464126   | 1.9867289546  | -1.0485879218 |
| H | 5.694581026   | 1.6472834617  | -2.2080828055 |
| C | -3.4360580111 | -3.779894109  | 3.1492805136  |
| C | -3.3544486206 | -5.1150038446 | 3.9139192578  |
| H | -4.3433655078 | -5.37689991   | 4.3046640649  |
| H | -3.0263870776 | -5.9353942245 | 3.2670143185  |
| H | -2.6675332771 | -5.0558610086 | 4.7646681766  |
| C | -3.9462383563 | -2.6952539985 | 4.1284066013  |
| H | -3.2477225677 | -2.5615927529 | 4.9614770212  |
| H | -4.0679100401 | -1.7269944349 | 3.6339374621  |
| H | -4.9188748121 | -2.983018902  | 4.5442278498  |
| C | -4.4576766358 | -3.9467255517 | 1.99852092    |
| H | -4.5914126538 | -3.0177739645 | 1.4363830437  |
| H | -4.1304035281 | -4.7202428436 | 1.295353051   |
| H | -5.4359349253 | -4.2414626163 | 2.3959023465  |

### 2aa (T<sub>3</sub>)

$\langle S^2 \rangle = 2.028266$

|    |              |              |              |
|----|--------------|--------------|--------------|
| Pt | -0.537457296 | -0.010407936 | 0.197088597  |
| C  | -0.108774566 | 1.157206570  | 1.758231675  |
| C  | -0.167287377 | 0.835674092  | 3.104613460  |
| C  | 0.167656731  | 1.767783144  | 4.100539151  |
| C  | 0.594007775  | 3.086456960  | 3.731923619  |
| C  | 0.671164385  | 3.465799618  | 2.423492791  |
| C  | 0.313629220  | 2.536620155  | 1.365691071  |
| C  | 0.332304112  | 2.868555168  | 0.011095844  |
| C  | 0.700935516  | 4.149978646  | -0.541009139 |
| C  | 0.655808005  | 4.364953057  | -1.895404504 |
| C  | 0.242119525  | 3.313527076  | -2.753472668 |
| C  | -0.099568201 | 2.075737680  | -2.176522906 |
| H  | -0.477117164 | -0.160821323 | 3.398147138  |
| H  | 0.112257934  | 1.493797708  | 5.148961563  |
| H  | 0.859695665  | 3.793607043  | 4.512992789  |

|   |              |              |              |                            |              |              |              |
|---|--------------|--------------|--------------|----------------------------|--------------|--------------|--------------|
| H | 0.996091593  | 4.468945176  | 2.171557562  | H                          | -4.329466668 | -5.391177060 | 4.338779717  |
| H | 1.013663680  | 4.944305072  | 0.126043085  | H                          | -3.016345652 | -5.946960759 | 3.294922543  |
| H | 0.932475957  | 5.330064444  | -2.307272460 | H                          | -2.652276907 | -5.062808533 | 4.788610071  |
| H | 0.187393097  | 3.439763500  | -3.827856707 | C                          | -3.944825411 | -2.708719783 | 4.154421333  |
| H | -0.415893197 | 1.246480852  | -2.802645506 | H                          | -3.242706878 | -2.570278664 | 4.983695127  |
| N | -0.056779986 | 1.844392108  | -0.877472501 | H                          | -4.073517169 | -1.742113015 | 3.658576789  |
| C | -2.594502240 | 0.462921673  | 0.063900778  | H                          | -4.913997408 | -3.000065901 | 4.575734690  |
| C | -3.343204453 | 1.284347776  | 0.916810966  | C                          | -4.461143362 | -3.966418568 | 2.029336890  |
| C | -4.702009537 | 1.527194507  | 0.693477133  | H                          | -4.600640872 | -3.039238093 | 1.465690321  |
| C | -5.348944430 | 0.946333506  | -0.401560134 | H                          | -4.134363996 | -4.740605206 | 1.326635647  |
| C | -4.631277568 | 0.124274918  | -1.265347767 | H                          | -5.436480189 | -4.263674506 | 2.431951657  |
| C | -3.263493039 | -0.121714494 | -1.040860628 |                            |              |              |              |
| C | -2.472465753 | -0.995339531 | -1.927560954 | <b>2ab (S<sub>0</sub>)</b> |              |              |              |
| C | -2.979039874 | -1.678435736 | -3.045294606 | Pt                         | -0.523682299 | -0.013684574 | 0.177278959  |
| C | -2.141343647 | -2.479999502 | -3.810918490 | C                          | -0.078810172 | 1.179497082  | 1.744143908  |
| C | -0.795326264 | -2.600418013 | -3.458432603 | C                          | -0.098791449 | 0.824654542  | 3.098324675  |
| C | -0.345982681 | -1.905422152 | -2.343124642 | C                          | 0.213555522  | 1.755842090  | 4.091513048  |
| H | -2.862927468 | 1.739065182  | 1.779372655  | C                          | 0.556135231  | 3.067948663  | 3.751086011  |
| H | -5.257778847 | 2.168948517  | 1.373075258  | C                          | 0.582193168  | 3.441475023  | 2.412002130  |
| H | -6.403854883 | 1.132426808  | -0.580633201 | C                          | 0.268328436  | 2.513308288  | 1.402447326  |
| H | -5.145690803 | -0.321103549 | -2.111669996 | C                          | 0.276409381  | 2.870686694  | -0.023341359 |
| H | -4.024813018 | -1.584096191 | -3.309934016 | C                          | 0.595535002  | 4.135543294  | -0.543197641 |
| H | -2.535060744 | -3.008142479 | -4.673783831 | C                          | 0.564686482  | 4.348220345  | -1.915535629 |
| H | -0.108706325 | -3.216763677 | -4.027127624 | C                          | 0.213392530  | 3.296732980  | -2.766513215 |
| H | 0.684673285  | -1.956908654 | -2.011205208 | C                          | -0.093716465 | 2.068036643  | -2.197180679 |
| N | -1.156660084 | -1.128099731 | -1.606531565 | H                          | -0.361422132 | -0.187563363 | 3.383432957  |
| C | -0.789798293 | -1.713688243 | 1.301101549  | H                          | 0.190105416  | 1.454558850  | 5.135602642  |
| C | -1.986879814 | -2.157451839 | 1.856863445  | H                          | 0.800164457  | 3.791950777  | 4.522526367  |
| C | -2.077875631 | -3.361043537 | 2.588357666  | H                          | 0.847030125  | 4.462536924  | 2.155309121  |
| C | -0.905616804 | -4.111392243 | 2.742466528  | H                          | 0.866091825  | 4.944665262  | 0.123748402  |
| C | 0.304379340  | -3.681264999 | 2.192111166  | H                          | 0.811631257  | 5.324921052  | -2.319606227 |
| C | 0.387316085  | -2.485866363 | 1.468896071  | H                          | 0.176863626  | 3.421671861  | -3.842510715 |
| C | 1.612167049  | -1.944933113 | 0.853541000  | H                          | -0.375023353 | 1.214826040  | -2.804327343 |
| C | 2.876422488  | -2.552689972 | 0.886202264  | N                          | -0.060511565 | 1.864493975  | -0.871417094 |
| C | 3.967594130  | -1.950204840 | 0.263910261  | C                          | -2.576444728 | 0.476215584  | 0.070905565  |
| C | 3.842805361  | -0.723948540 | -0.412794294 | C                          | -3.312699978 | 1.311029602  | 0.921682959  |
| C | 2.567071893  | -0.129127528 | -0.438127004 | C                          | -4.671258343 | 1.564397557  | 0.708627297  |
| H | -2.877513657 | -1.553611464 | 1.724231862  | C                          | -5.332511253 | 0.982624815  | -0.377421968 |
| H | -0.918546620 | -5.044176864 | 3.295093854  | C                          | -4.628821354 | 0.149393696  | -1.241930674 |
| H | 1.191339540  | -4.293253625 | 2.336246639  | C                          | -3.262005580 | -0.108490327 | -1.025447119 |
| H | 3.020700310  | -3.502152942 | 1.396579814  | C                          | -2.486942122 | -0.992859468 | -1.916192079 |
| H | 4.932303544  | -2.448064364 | 0.310378762  | C                          | -3.011065564 | -1.681108816 | -3.022878282 |
| H | 2.435328216  | 0.818194547  | -0.949824224 | C                          | -2.187434604 | -2.491396149 | -3.794499712 |
| C | 5.076953700  | -0.090082838 | -1.083041125 | C                          | -0.837253771 | -2.616499424 | -3.459509960 |
| C | 1.458213406  | -0.714943123 | 0.178257065  | C                          | -0.370082494 | -1.917264303 | -2.354361239 |
| C | 6.164656818  | 0.176902831  | -0.014739009 | H                          | -2.821099520 | 1.772674996  | 1.774237022  |
| H | 6.474207781  | -0.743860585 | 0.488642651  | H                          | -5.215907618 | 2.215376004  | 1.388506014  |
| H | 7.054273202  | 0.620325416  | -0.477094121 | H                          | -6.387067423 | 1.177412092  | -0.549448564 |
| H | 5.798538236  | 0.870096786  | 0.750165701  | H                          | -5.153521325 | -0.294372412 | -2.082852844 |
| C | 5.640643492  | -1.058768235 | -2.150537869 | H                          | -4.059956706 | -1.584334712 | -3.273891478 |
| H | 6.524992816  | -0.625036194 | -2.631736246 | H                          | -2.595304843 | -3.023122624 | -4.648552892 |
| H | 5.935358972  | -2.017777214 | -1.714139759 | H                          | -0.161432721 | -3.239833990 | -4.033490827 |
| H | 4.895815476  | -1.259283570 | -2.928390663 | H                          | 0.664413310  | -1.972696953 | -2.034911550 |
| C | 4.750613102  | 1.246669096  | -1.776166508 | N                          | -1.167278560 | -1.130946536 | -1.612447809 |
| H | 4.005100171  | 1.123846840  | -2.568821495 | C                          | -0.774585950 | -1.711425021 | 1.281660936  |
| H | 4.374314440  | 1.991891445  | -1.067820410 | C                          | -1.975795746 | -2.151724046 | 1.842172046  |
| H | 5.657662203  | 1.654066711  | -2.235242250 | C                          | -2.031187581 | -3.348343113 | 2.569373718  |
| C | -3.434825810 | -3.793183193 | 3.174985186  | C                          | -0.878362964 | -4.116067439 | 2.739894768  |
| C | -3.343787596 | -5.126368684 | 3.941896209  | C                          | 0.327928841  | -3.686058456 | 2.185834515  |

|   |              |              |              |
|---|--------------|--------------|--------------|
| C | 0.399003894  | -2.488253180 | 1.457358187  |
| C | 1.628869719  | -1.948411766 | 0.844518126  |
| C | 2.887200463  | -2.568159251 | 0.893187748  |
| C | 3.990901282  | -1.973439892 | 0.278620126  |
| C | 3.842051082  | -0.755189021 | -0.387681446 |
| C | 2.585708309  | -0.134805143 | -0.437873566 |
| H | -2.877889637 | -1.561973550 | 1.720384923  |
| H | -0.915821823 | -5.045095346 | 3.302367400  |
| H | 1.220485242  | -4.289842363 | 2.326584344  |
| H | 3.016374752  | -3.516544420 | 1.408785700  |
| H | 4.962153723  | -2.459273301 | 0.322044955  |
| H | 2.492095181  | 0.814713942  | -0.960555917 |
| C | 1.467024456  | -0.713893902 | 0.168697579  |
| H | 4.699849684  | -0.287936910 | -0.865935924 |
| H | -2.974512894 | -3.674462293 | 3.000197242  |

**2ab (T<sub>1</sub>)**

$\langle S^2 \rangle = 2.037652$

|    |              |              |              |
|----|--------------|--------------|--------------|
| Pt | -0.529931686 | -0.003957239 | 0.168548630  |
| C  | -0.079699924 | 1.180340416  | 1.739982484  |
| C  | -0.093579117 | 0.815228297  | 3.091173549  |
| C  | 0.225408190  | 1.739612229  | 4.088936807  |
| C  | 0.569124189  | 3.052943742  | 3.754869459  |
| C  | 0.591879763  | 3.434916612  | 2.417959830  |
| C  | 0.271709408  | 2.514008633  | 1.403682193  |
| C  | 0.278182470  | 2.878059218  | -0.020380453 |
| C  | 0.599681127  | 4.144742914  | -0.534369938 |
| C  | 0.566008478  | 4.364452037  | -1.905522050 |
| C  | 0.208704336  | 3.318654640  | -2.761013978 |
| C  | -0.101002133 | 2.087878192  | -2.197290800 |
| H  | -0.357633511 | -0.198256691 | 3.370377948  |
| H  | 0.206242262  | 1.431770022  | 5.131156760  |
| H  | 0.818143630  | 3.771511083  | 4.529802967  |
| H  | 0.860578756  | 4.456263379  | 2.166582211  |
| H  | 0.874368633  | 4.949534624  | 0.136115577  |
| H  | 0.815172384  | 5.342399407  | -2.305218527 |
| H  | 0.169751440  | 3.449358568  | -3.836233218 |
| H  | -0.387351935 | 1.238705963  | -2.807613211 |
| N  | -0.064019841 | 1.877265964  | -0.872794855 |
| C  | -2.584785662 | 0.483103094  | 0.057981406  |
| C  | -3.319591321 | 1.319932321  | 0.907818192  |
| C  | -4.678967323 | 1.571826221  | 0.697768734  |
| C  | -5.342591022 | 0.985215804  | -0.384019720 |
| C  | -4.640313931 | 0.149477215  | -1.247451818 |
| C  | -3.272469605 | -0.106102328 | -1.034916005 |
| C  | -2.500282590 | -0.990921515 | -1.929056034 |
| C  | -3.029630467 | -1.687720966 | -3.027870731 |
| C  | -2.206275246 | -2.496733827 | -3.802157426 |
| C  | -0.851628770 | -2.608294033 | -3.481054084 |
| C  | -0.379318940 | -1.896978547 | -2.385251707 |
| H  | -2.825981630 | 1.784492181  | 1.757675277  |
| H  | -5.222135923 | 2.224946201  | 1.376784246  |
| H  | -6.397870841 | 1.178130302  | -0.553850450 |
| H  | -5.167136701 | -0.298147080 | -2.085001267 |
| H  | -4.081080319 | -1.599347703 | -3.271313967 |
| H  | -2.618249783 | -3.037165089 | -4.648799113 |
| H  | -0.176778452 | -3.229086586 | -4.059063333 |
| H  | 0.661045293  | -1.932328286 | -2.080088486 |
| N  | -1.177363038 | -1.117279692 | -1.638931268 |

|   |              |              |              |
|---|--------------|--------------|--------------|
| C | -0.795100511 | -1.691481691 | 1.263101468  |
| C | -1.972747204 | -2.147884638 | 1.807800306  |
| C | -2.021364750 | -3.358092241 | 2.552884153  |
| C | -0.834581521 | -4.116890474 | 2.760265436  |
| C | 0.363080901  | -3.700935142 | 2.244545138  |
| C | 0.447951107  | -2.469098461 | 1.464160051  |
| C | 1.602602027  | -1.963120708 | 0.889744900  |
| C | 2.924421680  | -2.580400021 | 0.959824409  |
| C | 3.989015617  | -1.996021970 | 0.326028098  |
| C | 3.832113917  | -0.781460264 | -0.400597833 |
| C | 2.556113558  | -0.154790444 | -0.469055271 |
| H | -2.887220879 | -1.579454385 | 1.675892235  |
| H | -0.885288756 | -5.036531718 | 3.337959486  |
| H | 1.261148444  | -4.285727481 | 2.416259409  |
| H | 3.062395752  | -3.504783164 | 1.512169747  |
| H | 4.970678298  | -2.460862008 | 0.377628952  |
| H | 2.471386428  | 0.779999782  | -1.019367766 |
| C | 1.449593876  | -0.698993567 | 0.143518717  |
| H | 4.688529736  | -0.333694791 | -0.896364637 |
| H | -2.965078558 | -3.701889677 | 2.965192152  |

**2ab (T<sub>2</sub>)**

$\langle S^2 \rangle = 2.030294$

|    |              |              |              |
|----|--------------|--------------|--------------|
| Pt | -0.520140605 | -0.018683543 | 0.186449748  |
| C  | -0.074076119 | 1.186669593  | 1.749160915  |
| C  | -0.095538027 | 0.841189304  | 3.105659606  |
| C  | 0.217609316  | 1.777627386  | 4.093840354  |
| C  | 0.562084798  | 3.086965589  | 3.745261267  |
| C  | 0.589081008  | 3.452132483  | 2.403725068  |
| C  | 0.274678965  | 2.518222631  | 1.399635808  |
| C  | 0.285207338  | 2.869459791  | -0.028656675 |
| C  | 0.606861141  | 4.131692768  | -0.553545808 |
| C  | 0.578520016  | 4.338071339  | -1.927148529 |
| C  | 0.228764344  | 3.283293688  | -2.774638462 |
| C  | -0.079237407 | 2.056861071  | -2.200312297 |
| H  | -0.360118480 | -0.169069327 | 3.396749142  |
| H  | 0.193195096  | 1.482942859  | 5.139817015  |
| H  | 0.806729187  | 3.815583785  | 4.512189181  |
| H  | 0.855040821  | 4.471475738  | 2.141361628  |
| H  | 0.877718458  | 4.943730460  | 0.109745127  |
| H  | 0.826965401  | 5.312892642  | -2.334910763 |
| H  | 0.194829649  | 3.403983693  | -3.851236578 |
| H  | -0.357707835 | 1.198670238  | -2.802073259 |
| N  | -0.050070991 | 1.860827147  | -0.873858178 |
| C  | -2.559071600 | 0.474681395  | 0.101860254  |
| C  | -3.303918043 | 1.273666576  | 0.947956657  |
| C  | -4.676657459 | 1.526787284  | 0.736013379  |
| C  | -5.344781815 | 0.941189183  | -0.385787976 |
| C  | -4.674243987 | 0.136973427  | -1.261437227 |
| C  | -3.256410229 | -0.138913820 | -1.063482919 |
| C  | -2.516074002 | -0.957446535 | -1.915548387 |
| C  | -3.034056633 | -1.651639449 | -3.073565668 |
| C  | -2.223847751 | -2.450340768 | -3.835573159 |
| C  | -0.855669684 | -2.593771652 | -3.474562974 |
| C  | -0.380504292 | -1.901464663 | -2.346973538 |
| H  | -2.822348929 | 1.727396786  | 1.810469238  |
| H  | -5.230830041 | 2.165885660  | 1.416639622  |
| H  | -6.401654829 | 1.142106259  | -0.538442063 |
| H  | -5.202045466 | -0.297687277 | -2.102989139 |

|   |              |              |              |   |              |              |              |
|---|--------------|--------------|--------------|---|--------------|--------------|--------------|
| H | -4.079950467 | -1.536444441 | -3.331538936 | C | -0.364919597 | -1.912249544 | -2.344679465 |
| H | -2.619163207 | -2.970530275 | -4.701747668 | H | -2.860761704 | 1.728459967  | 1.794491953  |
| H | -0.177738858 | -3.217639720 | -4.044408854 | H | -5.253930146 | 2.170699744  | 1.392250853  |
| H | 0.657875304  | -1.986622290 | -2.041312070 | H | -6.405974185 | 1.149396708  | -0.565850418 |
| N | -1.138794012 | -1.115376294 | -1.600025468 | H | -5.156192342 | -0.304370756 | -2.103489180 |
| C | -0.768986180 | -1.714237148 | 1.292250704  | H | -4.045659041 | -1.578234441 | -3.299845024 |
| C | -1.971973705 | -2.156025940 | 1.847406381  | H | -2.564851772 | -3.006523371 | -4.668928942 |
| C | -2.029057362 | -3.352817090 | 2.573962685  | H | -0.137205082 | -3.223623571 | -4.029807007 |
| C | -0.875706436 | -4.118631705 | 2.749477994  | H | 0.666695620  | -1.967632102 | -2.016533668 |
| C | 0.332138387  | -3.687298403 | 2.199827433  | N | -1.170738193 | -1.132360852 | -1.605320305 |
| C | 0.404635407  | -2.489848152 | 1.470992264  | C | -0.783129046 | -1.717372545 | 1.301149794  |
| C | 1.634009046  | -1.950016681 | 0.858268574  | C | -1.978983436 | -2.164131649 | 1.867410070  |
| C | 2.893662326  | -2.566640412 | 0.910898003  | C | -2.024674404 | -3.362668259 | 2.592154090  |
| C | 3.996415023  | -1.971821932 | 0.294910639  | C | -0.867214025 | -4.125274880 | 2.754100913  |
| C | 3.844997700  | -0.756679285 | -0.376503246 | C | 0.333873248  | -3.688824312 | 2.193776847  |
| C | 2.587385785  | -0.139278171 | -0.430356604 | C | 0.394989667  | -2.489167598 | 1.467544828  |
| H | -2.873698585 | -1.565533103 | 1.723817326  | C | 1.619200143  | -1.945418686 | 0.846038357  |
| H | -0.914182765 | -5.047609266 | 3.311923828  | C | 2.880230934  | -2.560928166 | 0.883144366  |
| H | 1.224746288  | -4.290373969 | 2.343153413  | C | 3.976464601  | -1.962430470 | 0.258846252  |
| H | 3.024357618  | -3.512537961 | 1.430653664  | C | 3.819489161  | -0.745009699 | -0.407276980 |
| H | 4.968839978  | -2.455027082 | 0.341143971  | C | 2.560795110  | -0.128434796 | -0.448223875 |
| H | 2.492063071  | 0.807735142  | -0.957024273 | H | -2.884427241 | -1.577929477 | 1.752374392  |
| C | 1.469626235  | -0.718675336 | 0.177575954  | H | -0.897054949 | -5.055617305 | 3.314799949  |
| H | 4.701998694  | -0.289365729 | -0.856112981 | H | 1.229769196  | -4.289100298 | 2.327881903  |
| H | -2.973800733 | -3.680329906 | 3.000519850  | H | 3.016856510  | -3.509260771 | 1.396779129  |

### 2ab (T<sub>3</sub>)

$\langle S^2 \rangle = 2.028907$

|    |              |              |              |
|----|--------------|--------------|--------------|
| Pt | -0.543124128 | -0.016072892 | 0.194913908  |
| C  | -0.109625075 | 1.154310997  | 1.755297630  |
| C  | -0.156370965 | 0.833000377  | 3.100958793  |
| C  | 0.179069674  | 1.768628521  | 4.095134563  |
| C  | 0.593040984  | 3.090243673  | 3.724160414  |
| C  | 0.658775043  | 3.469331765  | 2.415337519  |
| C  | 0.301338732  | 2.536003134  | 1.359733578  |
| C  | 0.310619386  | 2.866756637  | 0.005704129  |
| C  | 0.667305513  | 4.150948321  | -0.549348835 |
| C  | 0.615258406  | 4.364135520  | -1.903583838 |
| C  | 0.206290190  | 3.308635203  | -2.758741792 |
| C  | -0.124412588 | 2.068448322  | -2.179469016 |
| H  | -0.456872723 | -0.165229632 | 3.398278178  |
| H  | 0.132648155  | 1.493841143  | 5.143771509  |
| H  | 0.858629140  | 3.799321290  | 4.503423201  |
| H  | 0.974847344  | 4.474472940  | 2.160334723  |
| H  | 0.976562322  | 4.948128669  | 0.115818108  |
| H  | 0.882856499  | 5.330813600  | -2.317657886 |
| H  | 0.146865569  | 3.433074779  | -3.833062340 |
| H  | -0.437177127 | 1.236772159  | -2.804056886 |
| N  | -0.075258547 | 1.838631506  | -0.880720083 |
| C  | -2.599720002 | 0.457998452  | 0.073755868  |
| C  | -3.343932252 | 1.279051574  | 0.930704960  |
| C  | -4.701692184 | 1.529337082  | 0.709439479  |
| C  | -5.352025458 | 0.956859646  | -0.387981284 |
| C  | -4.639129574 | 0.134644099  | -1.255466446 |
| C  | -3.272752906 | -0.119625873 | -1.032419976 |
| C  | -2.487207727 | -0.994884148 | -1.922226059 |
| C  | -2.999331392 | -1.675899262 | -3.038697004 |
| C  | -2.166694465 | -2.479995242 | -3.807132771 |
| C  | -0.820017362 | -2.605213205 | -3.458809033 |

### 2ac (S<sub>0</sub>)

|    |              |              |              |
|----|--------------|--------------|--------------|
| Pt | -0.523765036 | -0.012903068 | 0.172435571  |
| C  | -0.080592592 | 1.180053750  | 1.742217390  |
| C  | -0.103519372 | 0.825002148  | 3.095645049  |
| C  | 0.209266827  | 1.756632226  | 4.088585238  |
| C  | 0.554751914  | 3.067591373  | 3.747383627  |
| C  | 0.583589942  | 3.440493960  | 2.408093161  |
| C  | 0.269370520  | 2.512138807  | 1.399073493  |
| C  | 0.279607384  | 2.866444518  | -0.027188587 |
| C  | 0.601717422  | 4.129032059  | -0.549864418 |
| C  | 0.572663861  | 4.338228283  | -1.922785283 |
| C  | 0.220256789  | 3.285355966  | -2.771482390 |
| C  | -0.089908797 | 2.058568736  | -2.200053344 |
| H  | -0.368628888 | -0.186208394 | 3.381994352  |
| H  | 0.183598576  | 1.456283893  | 5.132797389  |
| H  | 0.799000209  | 3.791625073  | 4.518640195  |
| H  | 0.850745589  | 4.460786003  | 2.151008498  |
| H  | 0.873393471  | 4.939034398  | 0.115485804  |
| H  | 0.822066585  | 5.313319000  | -2.329079695 |
| H  | 0.185286265  | 3.407614765  | -3.847780664 |
| H  | -0.372173148 | 1.204664260  | -2.805489665 |
| N  | -0.058503085 | 1.858621309  | -0.873366864 |
| C  | -2.573848394 | 0.473735968  | 0.073621718  |
| C  | -3.307142897 | 1.302528586  | 0.932086774  |
| C  | -4.667488077 | 1.552682763  | 0.726147081  |
| C  | -5.331892486 | 0.973573826  | -0.359153472 |
| C  | -4.630338797 | 0.145435374  | -1.230258399 |
| C  | -3.261981746 | -0.109731943 | -1.021490931 |

|   |              |              |              |   |              |              |              |
|---|--------------|--------------|--------------|---|--------------|--------------|--------------|
| C | -2.488819098 | -0.989895927 | -1.917682469 | C | -3.300057970 | 1.261734942  | 0.958512642  |
| C | -3.015364187 | -1.675146460 | -3.024858998 | C | -4.674788754 | 1.513446742  | 0.751484236  |
| C | -2.192933793 | -2.481942826 | -3.801378191 | C | -5.343794265 | 0.937166717  | -0.374169497 |
| C | -0.841576001 | -2.606490523 | -3.470854648 | C | -4.673447195 | 0.141276407  | -1.257381014 |
| C | -0.371785294 | -1.910239316 | -2.365108199 | C | -3.255028235 | -0.136104660 | -1.062931442 |
| H | -2.812834280 | 1.761597475  | 1.784219834  | C | -2.516969348 | -0.953107504 | -1.917789675 |
| H | -5.210711658 | 2.198970795  | 1.411430391  | C | -3.037242095 | -1.645135876 | -3.076122986 |
| H | -6.387773028 | 1.165905816  | -0.525286780 | C | -2.228390759 | -2.442003078 | -3.841440973 |
| H | -5.157897298 | -0.297080166 | -2.069912037 | C | -0.859503097 | -2.585714468 | -3.483674421 |
| H | -4.065046095 | -1.578722226 | -3.272527291 | C | -0.382016408 | -1.896313593 | -2.355407830 |
| H | -2.602592767 | -3.011404550 | -4.655917875 | H | -2.817770265 | 1.709797632  | 1.823383655  |
| H | -0.166726005 | -3.227035796 | -4.048905400 | H | -5.228334547 | 2.145323674  | 1.439172698  |
| H | 0.664015798  | -1.965781855 | -2.050198978 | H | -6.400970232 | 1.138331442  | -0.523700925 |
| N | -1.168020821 | -1.127199077 | -1.618372700 | H | -5.201334823 | -0.286601134 | -2.102234739 |
| C | -0.776263130 | -1.708802011 | 1.274772880  | H | -4.083792209 | -1.530030289 | -3.331243047 |
| C | -1.982338393 | -2.144663954 | 1.825679787  | H | -2.625330662 | -2.960675253 | -4.707703283 |
| C | -2.010139175 | -3.337060853 | 2.545612125  | H | -0.182458051 | -3.207729860 | -4.056519827 |
| C | -0.880090902 | -4.118864411 | 2.740099221  | H | 0.657253071  | -1.982674569 | -2.053343222 |
| C | 0.324384978  | -3.680096544 | 2.188207827  | N | -1.139062543 | -1.112203453 | -1.604881342 |
| C | 0.398330029  | -2.484460487 | 1.458037708  | C | -0.769558158 | -1.711723530 | 1.287652519  |
| C | 1.629561301  | -1.944105723 | 0.849581923  | C | -1.976156793 | -2.147539556 | 1.837094944  |
| C | 2.889020796  | -2.559157999 | 0.905755443  | C | -2.004936389 | -3.340257894 | 2.556435081  |
| C | 3.998659100  | -1.969984190 | 0.295987894  | C | -0.874897213 | -4.121708998 | 2.752147259  |
| C | 3.818750546  | -0.761757439 | -0.364561784 | C | 0.330108180  | -3.682695783 | 2.201545856  |
| C | 2.580894733  | -0.125762589 | -0.438745940 | C | 0.404808110  | -2.487188597 | 1.471337250  |
| H | -2.898260686 | -1.576957849 | 1.712663772  | C | 1.634959189  | -1.947022104 | 0.861616277  |
| H | -0.946581902 | -5.041024576 | 3.307373809  | C | 2.895473192  | -2.559670931 | 0.919128747  |
| H | 1.214287317  | -4.284952538 | 2.336823718  | C | 4.003662783  | -1.970191812 | 0.307174981  |
| H | 3.023099589  | -3.504681859 | 1.424298309  | C | 3.820965417  | -0.764192962 | -0.356704111 |
| H | 4.980643139  | -2.429828111 | 0.329749969  | C | 2.582023812  | -0.130533395 | -0.432110488 |
| H | 2.515215221  | 0.819259517  | -0.970579227 | H | -2.891239298 | -1.577718113 | 1.725943893  |
| C | 1.467442389  | -0.711467857 | 0.168339005  | H | -0.941861551 | -5.044015115 | 3.319109648  |
| F | 4.892140610  | -0.178264191 | -0.962603293 | H | 1.219888541  | -4.287645679 | 2.350446190  |
| F | -3.191193213 | -3.746672508 | 3.077611069  | H | 3.031280860  | -3.503430370 | 1.440417376  |

### 2ac (T<sub>1</sub>)

$$\langle S^2 \rangle = 2.030418$$

|    |              |              |              |
|----|--------------|--------------|--------------|
| Pt | -0.519783125 | -0.018273011 | 0.183153490  |
| C  | -0.076120975 | 1.187073096  | 1.748565533  |
| C  | -0.100271040 | 0.841584436  | 3.104416839  |
| C  | 0.212715185  | 1.778826851  | 4.092187681  |
| C  | 0.559263918  | 3.087194834  | 3.742675278  |
| C  | 0.588803206  | 3.451551897  | 2.400887709  |
| C  | 0.274630679  | 2.517113248  | 1.397477712  |
| C  | 0.287047612  | 2.865034271  | -0.031297844 |
| C  | 0.610656829  | 4.125129441  | -0.559276216 |
| C  | 0.584052152  | 4.327662365  | -1.933492735 |
| C  | 0.234120802  | 3.270998990  | -2.778461032 |
| C  | -0.076053852 | 2.046396733  | -2.201769032 |
| H  | -0.366683434 | -0.167775384 | 3.396901132  |
| H  | 0.186307067  | 1.485211426  | 5.138324968  |
| H  | 0.803675892  | 3.816099579  | 4.509320807  |
| H  | 0.856444045  | 4.470246751  | 2.137966290  |
| H  | 0.881876224  | 4.938430305  | 0.102250094  |
| H  | 0.834177764  | 5.300968162  | -2.343693518 |
| H  | 0.201767792  | 3.388699186  | -3.855380311 |
| H  | -0.354785889 | 1.187128194  | -2.801573848 |
| N  | -0.048620926 | 1.854302561  | -0.874367538 |
| C  | -2.556858417 | 0.472097757  | 0.103872458  |

### 2ac (T<sub>2</sub>)

$$\langle S^2 \rangle = 2.035925$$

|    |              |              |              |
|----|--------------|--------------|--------------|
| Pt | -0.531231018 | -0.001049893 | 0.162561913  |
| C  | -0.081616817 | 1.181973965  | 1.737120366  |
| C  | -0.096819518 | 0.816162766  | 3.087539434  |
| C  | 0.223632166  | 1.740546529  | 4.085212913  |
| C  | 0.570197799  | 3.052837324  | 3.750610497  |
| C  | 0.594991410  | 3.434636116  | 2.413603489  |
| C  | 0.273271435  | 2.513967082  | 1.399718417  |
| C  | 0.281367848  | 2.875436562  | -0.024643460 |
| C  | 0.606162648  | 4.140011392  | -0.541250052 |
| C  | 0.573338022  | 4.356894031  | -1.912834195 |
| C  | 0.213346806  | 3.310376471  | -2.766328151 |
| C  | -0.099801911 | 2.081470268  | -2.200738036 |
| H  | -0.362402449 | -0.196592325 | 3.367777031  |
| H  | 0.203143297  | 1.433229609  | 5.127485423  |
| H  | 0.820250660  | 3.771075676  | 4.525457655  |
| H  | 0.866648900  | 4.455087955  | 2.161978284  |
| H  | 0.882872448  | 4.945260158  | 0.127796848  |

|   |              |              |              |   |              |              |              |
|---|--------------|--------------|--------------|---|--------------|--------------|--------------|
| H | 0.825286946  | 5.333268136  | -2.314508186 | H | -0.455726659 | -0.165555233 | 3.394311434  |
| H | 0.175064916  | 3.438976936  | -3.841771015 | H | 0.132124638  | 1.494371204  | 5.138400471  |
| H | -0.388557440 | 1.232107175  | -2.809404110 | H | 0.855216444  | 3.801048572  | 4.499499780  |
| N | -0.063262723 | 1.873621134  | -0.875483769 | H | 0.971241212  | 4.475396651  | 2.155138435  |
| C | -2.583385962 | 0.482572095  | 0.059553460  | H | 0.972231234  | 4.945743418  | 0.109160655  |
| C | -3.315019309 | 1.314081795  | 0.916721414  | H | 0.881963988  | 5.323263140  | -2.325590867 |
| C | -4.676007841 | 1.563435756  | 0.713686586  | H | 0.153307877  | 3.420390305  | -3.837707320 |
| C | -5.343060349 | 0.979461049  | -0.367203740 | H | -0.429042066 | 1.225615488  | -2.806997465 |
| C | -4.643283197 | 0.148140848  | -1.236906993 | N | -0.071763076 | 1.830831253  | -0.883537735 |
| C | -3.274034673 | -0.105316144 | -1.031921211 | C | -2.594385101 | 0.456637517  | 0.075954240  |
| C | -2.504174710 | -0.986803749 | -1.931047730 | C | -3.334513167 | 1.273688865  | 0.939559397  |
| C | -3.036802179 | -1.682654739 | -3.028626602 | C | -4.693968678 | 1.522185151  | 0.726326969  |
| C | -2.215387064 | -2.490324300 | -3.806498743 | C | -5.349137050 | 0.951697252  | -0.369065939 |
| C | -0.859563201 | -2.601029276 | -3.490264726 | C | -4.639916926 | 0.132888331  | -1.242790327 |
| C | -0.383675823 | -1.890014056 | -2.395892123 | C | -3.272079300 | -0.119820198 | -1.028070600 |
| H | -2.818428112 | 1.776233936  | 1.765934109  | C | -2.489995808 | -0.992076603 | -1.923620928 |
| H | -5.217435448 | 2.212467943  | 1.397828572  | C | -3.006017002 | -1.670237293 | -3.039875662 |
| H | -6.399534204 | 1.170479098  | -0.531287671 | C | -2.175934969 | -2.471794159 | -3.813669079 |
| H | -5.173101761 | -0.298180320 | -2.073143410 | C | -0.827767126 | -2.597472850 | -3.471104604 |
| H | -4.089159887 | -1.594901509 | -3.268210496 | C | -0.368424131 | -1.907443175 | -2.357093847 |
| H | -2.629833240 | -3.030411750 | -4.652097052 | H | -2.847310167 | 1.721450940  | 1.801835118  |
| H | -0.186266078 | -3.220790335 | -4.071138962 | H | -5.243546287 | 2.160396864  | 1.414062148  |
| H | 0.658007382  | -1.925221806 | -2.095640312 | H | -6.404386759 | 1.142705563  | -0.540414577 |
| N | -1.179973183 | -1.111566509 | -1.646026138 | H | -5.161050681 | -0.305108259 | -2.088738724 |
| C | -0.797722616 | -1.689661951 | 1.252761445  | H | -4.053336418 | -1.572232402 | -3.296760714 |
| C | -1.977946217 | -2.145546277 | 1.784495721  | H | -2.577169510 | -2.996077878 | -4.675349201 |
| C | -1.991547686 | -3.354213404 | 2.523053982  | H | -0.147004064 | -3.213918011 | -4.046578386 |
| C | -0.832880338 | -4.122837378 | 2.759698629  | H | 0.664727457  | -1.963692346 | -2.034142814 |
| C | 0.365589192  | -3.694848233 | 2.249033836  | N | -1.172017416 | -1.129836290 | -1.612565297 |
| C | 0.445641461  | -2.462839511 | 1.464196437  | C | -0.783903597 | -1.716898772 | 1.291090467  |
| C | 1.602303815  | -1.955586388 | 0.893951049  | C | -1.985380718 | -2.158805443 | 1.846739438  |
| C | 2.925598110  | -2.573915684 | 0.977243389  | C | -2.004558758 | -3.352581114 | 2.564774586  |
| C | 3.998532356  | -1.992637336 | 0.348782060  | C | -0.869923290 | -4.129423439 | 2.752566643  |
| C | 3.808775592  | -0.792579130 | -0.367073383 | C | 0.330025776  | -3.684588518 | 2.195719440  |
| C | 2.551032414  | -0.145601583 | -0.466017366 | C | 0.395064185  | -2.487444772 | 1.467177637  |
| H | -2.908666422 | -1.603918953 | 1.662011032  | C | 1.621590351  | -1.943008432 | 0.851988711  |
| H | -0.913268919 | -5.035093504 | 3.342496710  | C | 2.883799748  | -2.553607814 | 0.899420916  |
| H | 1.263841416  | -4.273906396 | 2.432968900  | C | 3.987157183  | -1.960326387 | 0.282293288  |
| H | 3.064994531  | -3.494721557 | 1.533433036  | C | 3.800059042  | -0.752906045 | -0.378111536 |
| H | 4.991115541  | -2.430467575 | 0.390353305  | C | 2.559525010  | -0.121228406 | -0.445558884 |
| H | 2.499134318  | 0.785220486  | -1.024296343 | H | -2.904266636 | -1.594628787 | 1.738993653  |
| C | 1.449600231  | -0.694742798 | 0.143910788  | H | -0.929586734 | -5.052764315 | 3.318668033  |
| F | 4.878341080  | -0.234514442 | -0.988228733 | H | 1.223148252  | -4.285885853 | 2.339247418  |
| F | -3.173202542 | -3.789710653 | 3.025478463  | H | 3.024566744  | -3.499074157 | 1.416231129  |

### 2ac (T<sub>3</sub>)

$\langle S^2 \rangle = 2.029713$

|    |              |              |              |
|----|--------------|--------------|--------------|
| Pt | -0.541320697 | -0.017907501 | 0.186409221  |
| C  | -0.108993317 | 1.153719864  | 1.751328568  |
| C  | -0.155959708 | 0.832229281  | 3.094723873  |
| C  | 0.178946012  | 1.769988157  | 4.090041793  |
| C  | 0.591027031  | 3.091811631  | 3.720087749  |
| C  | 0.656506095  | 3.470239146  | 2.411377352  |
| C  | 0.300727573  | 2.534395965  | 1.355556777  |
| C  | 0.311104800  | 2.862520880  | 0.002337387  |
| C  | 0.666030847  | 4.146887135  | -0.555272678 |
| C  | 0.615788383  | 4.357130520  | -1.909607129 |
| C  | 0.210539062  | 3.298585164  | -2.763017311 |
| C  | -0.119035663 | 2.058369723  | -2.182763578 |

### 2ca (S<sub>0</sub>)

|   |              |              |               |
|---|--------------|--------------|---------------|
| C | -4.579170860 | -6.484376240 | -72.785424888 |
| C | -4.200058378 | -6.857748466 | -74.061935882 |
| C | -2.241190652 | -6.563550470 | -72.575934198 |
| C | -3.436150823 | -6.322237918 | -71.943769002 |
| C | -5.173360021 | -7.086040665 | -75.108316686 |
| C | -7.472468964 | -7.099878650 | -75.583634275 |
| C | -7.250866095 | -7.456098019 | -76.908572395 |
| C | -5.930691469 | -7.630510448 | -77.336036485 |

|    |               |               |               |                              |               |               |               |
|----|---------------|---------------|---------------|------------------------------|---------------|---------------|---------------|
| C  | -4.888954201  | -7.445581680  | -76.436684405 | H                            | -14.244160192 | -8.412047512  | -72.115760604 |
| C  | -6.690917242  | -5.950638488  | -70.609898370 | H                            | -13.839072838 | -6.745850180  | -71.688881255 |
| C  | -6.691294228  | -7.079454630  | -69.806353301 | H                            | -13.778456325 | -7.270303517  | -73.381862153 |
| C  | -6.676777997  | -4.979373299  | -68.489083487 | C                            | -11.930565614 | -8.469017200  | -70.692218241 |
| C  | -6.684246063  | -4.748736068  | -69.840688966 | H                            | -10.917295960 | -8.834693284  | -70.501366762 |
| C  | -6.695348784  | -8.406221164  | -70.376937082 | H                            | -12.122714583 | -7.639869001  | -70.002853218 |
| C  | -6.696953832  | -9.570360047  | -72.410716065 | H                            | -12.629666229 | -9.278774228  | -70.452635358 |
| C  | -6.697814115  | -10.801907379 | -71.766464461 | C                            | -11.846940580 | -9.220627649  | -73.098855514 |
| C  | -6.695780169  | -10.818381513 | -70.367185403 | H                            | -11.978585010 | -8.934731915  | -74.148134622 |
| C  | -6.693334365  | -9.619153152  | -69.667471790 | H                            | -10.831669524 | -9.611336940  | -72.982137534 |
| C  | -9.207555860  | -4.859057729  | -73.034381087 | H                            | -12.545845664 | -10.036286326 | -72.879892552 |
| C  | -10.578161607 | -4.606684637  | -73.156419415 | C                            | -8.771705157  | -6.144530144  | -72.632682108 |
| C  | -11.514633461 | -5.607713057  | -72.882322005 |                              |               |               |               |
| C  | -11.112148760 | -6.887838649  | -72.478461866 | <b>2ca (T<sub>1</sub>)</b>   |               |               |               |
| C  | -9.724773174  | -7.124389399  | -72.361834904 | <S <sup>2</sup> > = 2.033814 |               |               |               |
| C  | -8.129054102  | -3.890623262  | -73.291879795 | C                            | -4.587649613  | -6.465852178  | -72.740395608 |
| C  | -5.725203688  | -3.515482001  | -73.329821804 | C                            | -4.192001855  | -6.856075578  | -74.116380812 |
| C  | -5.899782385  | -2.173132594  | -73.713360478 | C                            | -2.234848499  | -6.554463756  | -72.585519715 |
| C  | -7.217104322  | -1.714963645  | -73.883452862 | C                            | -3.468742791  | -6.318680736  | -71.946566762 |
| C  | -8.308962514  | -2.553984493  | -73.677811408 | C                            | -5.143271378  | -7.083600681  | -75.106258716 |
| H  | -1.240458984  | -6.508990232  | -72.166824092 | C                            | -7.460672915  | -7.104965154  | -75.559580523 |
| H  | -3.489654982  | -6.032800982  | -70.899455693 | C                            | -7.242812706  | -7.463555185  | -76.894512156 |
| H  | -8.471093850  | -6.947096976  | -75.189524227 | C                            | -5.913353824  | -7.639974466  | -77.344451462 |
| H  | -8.089720781  | -7.589826455  | -77.581529220 | C                            | -4.874477372  | -7.452095587  | -76.462983455 |
| H  | -5.717546229  | -7.906955818  | -78.364001921 | C                            | -6.695175108  | -5.951937830  | -70.596576862 |
| H  | -3.858198000  | -7.573478793  | -76.749052443 | C                            | -6.697779719  | -7.084477845  | -69.798515127 |
| H  | -6.684683481  | -3.754943411  | -70.270715333 | C                            | -6.687589670  | -4.990350901  | -68.470790359 |
| H  | -6.695769798  | -9.495276357  | -73.492945453 | C                            | -6.690727585  | -4.753920417  | -69.821471365 |
| H  | -6.698841566  | -11.717762593 | -72.345850576 | C                            | -6.702843416  | -8.411235595  | -70.371324628 |
| H  | -6.695227338  | -11.761046381 | -69.828964515 | C                            | -6.708952344  | -9.574653103  | -72.405312107 |
| H  | -6.689822269  | -9.609098255  | -68.582913493 | C                            | -6.713016795  | -10.806886831 | -71.761813522 |
| H  | -6.671174909  | -4.253515975  | -67.686715838 | C                            | -6.710637826  | -10.823505378 | -70.362623366 |
| H  | -12.567655493 | -5.371393875  | -72.987616635 | C                            | -6.705055324  | -9.624424446  | -69.662209122 |
| H  | -9.390136669  | -8.109588529  | -72.047801016 | C                            | -9.206442365  | -4.853006492  | -73.026135976 |
| H  | -4.726166647  | -3.905607419  | -73.188267419 | C                            | -10.577316246 | -4.600852776  | -73.145187099 |
| H  | -7.400158480  | -0.685967324  | -74.179966221 | C                            | -11.512618036 | -5.603772221  | -72.874373233 |
| H  | -9.311900988  | -2.158350409  | -73.817009896 | C                            | -11.108406154 | -6.885340879  | -72.476847875 |
| H  | -10.934888775 | -3.627218169  | -73.466587664 | C                            | -9.720782543  | -7.121208832  | -72.362245546 |
| N  | -6.469799206  | -6.923185784  | -74.709161462 | C                            | -8.128933926  | -3.883896922  | -73.283264789 |
| N  | -6.698511677  | -8.409107562  | -71.740994631 | C                            | -5.724778653  | -3.509391970  | -73.327007110 |
| S  | -2.453767154  | -7.005362566  | -74.241138582 | C                            | -5.899445511  | -2.168354796  | -73.714832120 |
| S  | -6.679978355  | -6.672165952  | -68.100921921 | C                            | -7.216993989  | -1.710051790  | -73.882431550 |
| Pt | -6.681220387  | -6.331641239  | -72.578470016 | C                            | -8.308712689  | -2.548078493  | -73.672132278 |
| C  | -4.716435644  | -1.214452372  | -73.946655147 | H                            | -1.238246208  | -6.501139993  | -72.168250225 |
| C  | -6.810634387  | -4.369851809  | -73.122769563 | H                            | -3.504836982  | -6.036723191  | -70.898796339 |
| C  | -4.752031614  | -0.697850788  | -75.405245449 | H                            | -8.464620689  | -6.958610867  | -75.174283922 |
| H  | -3.920823635  | -0.006403400  | -75.585741458 | H                            | -8.088723705  | -7.598928727  | -77.557790857 |
| H  | -4.663657558  | -1.527064996  | -76.115390204 | H                            | -5.715835187  | -7.917908676  | -78.374633622 |
| H  | -5.682252065  | -0.165681062  | -75.625604910 | H                            | -3.844349072  | -7.576254646  | -76.780359627 |
| C  | -4.827835345  | -0.012078130  | -72.978433822 | H                            | -6.689817189  | -3.758071579  | -70.246958449 |
| H  | -3.996816647  | 0.684715418   | -73.137939487 | H                            | -6.709660912  | -9.497563620  | -73.487665323 |
| H  | -5.760012968  | 0.542053412   | -73.123531049 | H                            | -6.717198777  | -11.722694472 | -72.341326111 |
| H  | -4.794970273  | -0.345836928  | -71.935706987 | H                            | -6.712954882  | -11.766316405 | -69.824620499 |
| C  | -3.352976976  | -1.892303589  | -73.712718056 | H                            | -6.702975604  | -9.615311484  | -68.577604787 |
| H  | -3.249353053  | -2.256710330  | -72.685442667 | H                            | -6.684591087  | -4.268238511  | -67.665030154 |
| H  | -3.196140206  | -2.737366921  | -74.390949190 | H                            | -12.565964983 | -5.367933532  | -72.977379701 |
| H  | -2.548663139  | -1.170760578  | -73.890852877 | H                            | -9.385171029  | -8.107430333  | -72.052866301 |
| C  | -12.110658391 | -8.017307425  | -72.161675727 | H                            | -4.725954701  | -3.899260297  | -73.181608252 |
| C  | -13.575176695 | -7.577413597  | -72.350563958 | H                            | -7.400320885  | -0.681873239  | -74.181528352 |

|    |               |               |               |    |               |               |               |
|----|---------------|---------------|---------------|----|---------------|---------------|---------------|
| H  | -9.311766630  | -2.152801382  | -73.811314891 | C  | -11.100940045 | -6.888018569  | -72.480436226 |
| H  | -10.935006305 | -3.620258758  | -73.450609157 | C  | -9.712960879  | -7.121525068  | -72.363151497 |
| N  | -6.474538888  | -6.924461683  | -74.684822484 | C  | -8.123636703  | -3.881812794  | -73.289377316 |
| N  | -6.705131737  | -8.414416744  | -71.734804315 | C  | -5.720491524  | -3.500853452  | -73.330638324 |
| S  | -2.430416911  | -6.993362307  | -74.304798076 | C  | -5.898681167  | -2.159567580  | -73.716180463 |
| S  | -6.692082649  | -6.684870016  | -68.090851678 | C  | -7.217383304  | -1.705050658  | -73.885464794 |
| Pt | -6.677746232  | -6.322988768  | -72.570165108 | C  | -8.307102773  | -2.546200777  | -73.677208146 |
| C  | -4.716065950  | -1.211289062  | -73.954119721 | H  | -1.226788579  | -6.488361579  | -72.189996235 |
| C  | -6.810331962  | -4.362036258  | -73.114331303 | H  | -3.469725108  | -5.995372857  | -70.916788894 |
| C  | -4.754795602  | -0.699642175  | -75.414347827 | H  | -8.473280093  | -6.955139411  | -75.170183327 |
| H  | -3.923778169  | -0.009082001  | -75.598982002 | H  | -8.104575792  | -7.618114101  | -77.558107835 |
| H  | -4.668341169  | -1.531246629  | -76.121908610 | H  | -5.736868713  | -7.945744510  | -78.349763349 |
| H  | -5.685347963  | -0.167901135  | -75.634299821 | H  | -3.868995396  | -7.601148678  | -76.746796031 |
| C  | -4.824469307  | -0.005660402  | -72.989596816 | H  | -6.636484271  | -3.760113267  | -70.258346344 |
| H  | -3.993191333  | 0.689856862   | -73.153182438 | H  | -6.678629588  | -9.487271969  | -73.495171173 |
| H  | -5.756448800  | 0.548808894   | -73.134582916 | H  | -6.716214243  | -11.709184894 | -72.358651374 |
| H  | -4.789704960  | -0.335997857  | -71.945846552 | H  | -6.772461392  | -11.781951740 | -69.832812692 |
| C  | -3.352572150  | -1.889307472  | -73.720849394 | H  | -6.773422696  | -9.645149831  | -68.568315080 |
| H  | -3.246720788  | -2.249140254  | -72.692146285 | H  | -6.657362007  | -4.276016020  | -67.663286515 |
| H  | -3.197996925  | -2.737326888  | -74.395944094 | H  | -12.559023448 | -5.374329009  | -72.989250205 |
| H  | -2.548112895  | -1.169227609  | -73.904050558 | H  | -9.374145568  | -8.106172531  | -72.051920132 |
| C  | -12.105462664 | -8.017569580  | -72.165347158 | H  | -4.720463842  | -3.888503717  | -73.188925715 |
| C  | -13.570635402 | -7.577917850  | -72.349663298 | H  | -7.403281367  | -0.676948064  | -74.183244474 |
| H  | -14.238524507 | -8.414494851  | -72.118692775 | H  | -9.311044250  | -2.152982271  | -73.815774796 |
| H  | -13.834343052 | -6.750378985  | -71.682870860 | H  | -10.930735686 | -3.625955933  | -73.466423619 |
| H  | -13.775667296 | -7.265138376  | -73.378903523 | N  | -6.469493130  | -6.929246980  | -74.699638918 |
| C  | -11.923090404 | -8.478067877  | -70.698910216 | N  | -6.705392833  | -8.401267272  | -71.755440640 |
| H  | -10.909286068 | -8.844030087  | -70.511495214 | S  | -2.451096893  | -7.008526093  | -74.251890405 |
| H  | -12.115161107 | -7.653343071  | -70.004235429 | S  | -6.708419674  | -6.742893085  | -68.063639267 |
| H  | -12.621176638 | -9.289907006  | -70.463467087 | Pt | -6.670972446  | -6.318566486  | -72.572465971 |
| C  | -11.841779197 | -9.214882319  | -73.110224358 | C  | -4.717975719  | -1.198255903  | -73.951760649 |
| H  | -11.975009942 | -8.922674029  | -74.157558740 | C  | -6.803759898  | -4.357032448  | -73.121646649 |
| H  | -10.825962507 | -9.605249602  | -72.997182572 | C  | -4.756760046  | -0.682755478  | -75.410648878 |
| H  | -12.539619153 | -10.032549700 | -72.895390037 | H  | -3.927371203  | 0.010455976   | -75.592641401 |
| C  | -8.768704405  | -6.139454540  | -72.629839368 | H  | -4.667408917  | -1.512227089  | -76.120361295 |

## 2ca (T<sub>2</sub>)

$\langle S^2 \rangle = 2.035877$

|   |               |               |               |   |               |               |               |
|---|---------------|---------------|---------------|---|---------------|---------------|---------------|
| C | -4.567933141  | -6.473399622  | -72.791068034 | H | -5.764763974  | 0.556219704   | -73.128356087 |
| C | -4.196383279  | -6.860375778  | -74.065266523 | H | -4.795993501  | -0.328567047  | -71.941233714 |
| C | -2.229650989  | -6.547329652  | -72.593216069 | C | -3.352638043  | -1.872783584  | -73.719159731 |
| C | -3.421226611  | -6.299164520  | -71.957310648 | H | -3.246650084  | -2.235968752  | -72.691688546 |
| C | -5.175397883  | -7.097314998  | -75.104223500 | H | -3.194813818  | -2.718081564  | -74.396875976 |
| C | -7.476764719  | -7.112104337  | -75.567721915 | H | -2.550265520  | -1.149548968  | -73.899092696 |
| C | -7.262122383  | -7.479884642  | -76.890599419 | C | -12.096907455 | -8.020169216  | -72.165848818 |
| C | -5.944451136  | -7.660036316  | -77.323209758 | C | -13.562270697 | -7.583233329  | -72.354973592 |
| C | -4.898025839  | -7.468902891  | -76.430641200 | H | -14.229471925 | -8.419654488  | -72.121558799 |
| C | -6.674038393  | -5.906357677  | -70.626395470 | H | -13.828351337 | -6.753118694  | -71.692346308 |
| C | -6.706151938  | -7.134636440  | -69.786070995 | H | -13.765722098 | -7.275324086  | -73.385998731 |
| C | -6.668748896  | -4.997900271  | -68.467833846 | C | -11.916337679 | -8.473459219  | -70.696940619 |
| C | -6.656682914  | -4.764290074  | -69.851895353 | H | -10.902219065 | -8.836789143  | -70.506106073 |
| C | -6.723165304  | -8.403819440  | -70.356432522 | H | -12.111137931 | -7.645856747  | -70.006461677 |
| C | -6.699615699  | -9.553683026  | -72.411617783 | H | -12.613402972 | -9.285410587  | -70.458988131 |
| C | -6.721474053  | -10.800167867 | -71.769360119 | C | -11.829626695 | -9.221438402  | -73.104629896 |
| C | -6.751413262  | -10.832438419 | -70.357865005 | H | -11.961088558 | -8.934323972  | -74.153592556 |
| C | -6.752100504  | -9.649247304  | -69.652992971 | H | -10.813622516 | -9.610163701  | -72.987574301 |
| C | -9.200342222  | -4.852307374  | -73.031079021 | H | -12.526869421 | -10.038931260 | -72.887356597 |
| C | -10.571595311 | -4.604146624  | -73.155149390 | C | -8.764451672  | -6.137569240  | -72.630363253 |
| C | -11.505563733 | -5.608136240  | -72.882886637 |   |               |               |               |



**2ca (T<sub>3</sub>)** $\langle S^2 \rangle = 2.034087$ 

|    |               |               |               |
|----|---------------|---------------|---------------|
| C  | -4.567039874  | -6.499055087  | -72.764836718 |
| C  | -4.185034750  | -6.870757707  | -74.041047139 |
| C  | -2.228883238  | -6.576554101  | -72.549825122 |
| C  | -3.425657587  | -6.336803363  | -71.920725979 |
| C  | -5.152389325  | -7.099194265  | -75.094430017 |
| C  | -7.449092453  | -7.130416357  | -75.577179900 |
| C  | -7.220527252  | -7.470395965  | -76.905792627 |
| C  | -5.897318377  | -7.628943978  | -77.329661487 |
| C  | -4.859520129  | -7.445325399  | -76.424429718 |
| C  | -6.680154465  | -5.955644717  | -70.585059848 |
| C  | -6.692334326  | -7.083226817  | -69.780073300 |
| C  | -6.675412825  | -4.979683915  | -68.467005683 |
| C  | -6.673822595  | -4.751867072  | -69.819278984 |
| C  | -6.699719577  | -8.410987570  | -70.348495921 |
| C  | -6.690816116  | -9.578591822  | -72.380307424 |
| C  | -6.699699044  | -10.809070587 | -71.733813695 |
| C  | -6.707749841  | -10.823031976 | -70.334490187 |
| C  | -6.706082351  | -9.622654930  | -69.636773689 |
| C  | -9.181267710  | -4.809398582  | -72.994909756 |
| C  | -10.610791576 | -4.548952743  | -73.082982313 |
| C  | -11.516222633 | -5.549746981  | -72.836203149 |
| C  | -11.111197140 | -6.871253546  | -72.478413711 |
| C  | -9.699779498  | -7.122012652  | -72.375145829 |
| C  | -8.166439258  | -3.899125410  | -73.237816401 |
| C  | -5.724201691  | -3.542164695  | -73.324404087 |
| C  | -5.904870107  | -2.179240861  | -73.706374809 |
| C  | -7.255043685  | -1.701666792  | -73.832795783 |
| C  | -8.337531259  | -2.503495453  | -73.610898533 |
| H  | -1.229224937  | -6.522381538  | -72.138055900 |
| H  | -3.482215247  | -6.048244438  | -70.876279317 |
| H  | -8.450373544  | -6.997912173  | -75.180366814 |
| H  | -8.055435546  | -7.605352885  | -77.583590894 |
| H  | -5.678078444  | -7.892992206  | -78.359657376 |
| H  | -3.826878555  | -7.563998742  | -76.734493189 |
| H  | -6.667847707  | -3.759124541  | -70.251645901 |
| H  | -6.681506989  | -9.504769214  | -73.462532578 |
| H  | -6.699604745  | -11.725988812 | -72.311521261 |
| H  | -6.713977993  | -11.764764222 | -69.794647371 |
| H  | -6.709517611  | -9.610684993  | -68.552233384 |
| H  | -6.670256787  | -4.252240266  | -67.666116026 |
| H  | -12.573429293 | -5.319794648  | -72.915328377 |
| H  | -9.378954889  | -8.119125520  | -72.085272586 |
| H  | -4.719005599  | -3.925068002  | -73.205872617 |
| H  | -7.423083338  | -0.665158662  | -74.112397695 |
| H  | -9.339646439  | -2.096871771  | -73.709242420 |
| H  | -10.966036095 | -3.557437830  | -73.348022855 |
| N  | -6.450721043  | -6.951445543  | -74.700064376 |
| N  | -6.694647042  | -8.416256164  | -71.712581517 |
| S  | -2.437782238  | -7.016796287  | -74.215869839 |
| S  | -6.687365775  | -6.672005664  | -68.075445741 |
| Pt | -6.670219056  | -6.340252488  | -72.551979403 |
| C  | -4.738025594  | -1.226518444  | -73.983279505 |
| C  | -6.783154054  | -4.392014668  | -73.103270969 |
| C  | -4.828285394  | -0.705596710  | -75.440771764 |
| H  | -4.008835353  | -0.007106132  | -75.647096915 |
| H  | -4.757764223  | -1.532741856  | -76.155120832 |
| H  | -5.769080579  | -0.179351456  | -75.628238625 |

|   |               |              |               |
|---|---------------|--------------|---------------|
| C | -4.810423768  | -0.020056634 | -73.012194802 |
| H | -3.990098710  | 0.679175763  | -73.212225919 |
| H | -5.749738410  | 0.531466369  | -73.115342560 |
| H | -4.727951758  | -0.351716608 | -71.971698448 |
| C | -3.365879852  | -1.903365166 | -73.802360153 |
| H | -3.222179658  | -2.266376600 | -72.779472702 |
| H | -3.236220117  | -2.749294433 | -74.485164437 |
| H | -2.569238392  | -1.182054490 | -74.012816062 |
| C | -12.105442873 | -8.003390064 | -72.201503194 |
| C | -13.571660206 | -7.557802605 | -72.365002559 |
| H | -14.238508261 | -8.401754538 | -72.159564309 |
| H | -13.833078371 | -6.753531399 | -71.669428170 |
| H | -13.781037123 | -7.210938984 | -73.382389742 |
| C | -11.918810630 | -8.515922836 | -70.750237764 |
| H | -10.903312186 | -8.883579843 | -70.576286618 |
| H | -12.115189577 | -7.717360606 | -70.026981583 |
| H | -12.612921791 | -9.339352957 | -70.544675157 |
| C | -11.847821502 | -9.173601202 | -73.185145802 |
| H | -11.993543634 | -8.850999934 | -74.221725715 |
| H | -10.829872386 | -9.563942873 | -73.094231034 |
| H | -12.541337180 | -9.999012087 | -72.985970894 |
| C | -8.750431068  | -6.162208844 | -72.619198672 |

**2cb (S<sub>0</sub>)**

|   |               |               |               |
|---|---------------|---------------|---------------|
| C | -4.574546449  | -6.484223308  | -72.816044671 |
| C | -4.204627146  | -6.819442913  | -74.105749641 |
| C | -2.235053090  | -6.554775970  | -72.628553996 |
| C | -3.425792908  | -6.338454873  | -71.979597477 |
| C | -5.186051411  | -7.022748208  | -75.149690938 |
| C | -7.489364535  | -7.033387211  | -75.604938421 |
| C | -7.278109675  | -7.351625783  | -76.941115738 |
| C | -5.961088945  | -7.508223248  | -77.384861024 |
| C | -4.912091428  | -7.343923449  | -76.489938157 |
| C | -6.661764444  | -6.022097367  | -70.606883647 |
| C | -6.644035525  | -7.173974313  | -69.837345625 |
| C | -6.627162920  | -5.113402672  | -68.459308271 |
| C | -6.653295386  | -4.843119725  | -69.803345986 |
| C | -6.647392519  | -8.483243389  | -70.447134031 |
| C | -6.675179670  | -9.586234094  | -72.514698336 |
| C | -6.656308098  | -10.836162081 | -71.907381716 |
| C | -6.629821877  | -10.894332154 | -70.509542550 |
| C | -6.624162908  | -9.716473981  | -69.774414808 |
| C | -9.210362352  | -4.865546998  | -72.970176011 |
| C | -10.583537624 | -4.596404977  | -73.073224814 |
| C | -11.519473634 | -5.601962382  | -72.823654240 |
| C | -11.087303412 | -6.881776871  | -72.469456327 |
| C | -9.715794888  | -7.153815570  | -72.365712186 |
| C | -8.135367557  | -3.884002133  | -73.209165157 |
| C | -5.734579810  | -3.505920895  | -73.261322984 |
| C | -5.951770293  | -2.162741485  | -73.597236235 |
| C | -7.253038580  | -1.679941076  | -73.742723465 |
| C | -8.336748711  | -2.537505252  | -73.549530376 |
| H | -1.231164250  | -6.505794160  | -72.226574554 |
| H | -3.472284590  | -6.078437810  | -70.927289888 |
| H | -8.485136097  | -6.895809328  | -75.198310686 |
| H | -8.122393931  | -7.470299813  | -77.610062986 |
| H | -5.755995348  | -7.754918167  | -78.421969585 |
| H | -3.883688193  | -7.458619125  | -76.814888443 |
| H | -6.665636117  | -3.837001213  | -70.203493947 |

|    |               |               |               |    |               |               |               |
|----|---------------|---------------|---------------|----|---------------|---------------|---------------|
| H  | -6.693486768  | -9.479262924  | -73.594038946 | H  | -6.671110826  | -11.738302978 | -72.510034697 |
| H  | -6.661356131  | -11.734314728 | -72.513792385 | H  | -6.623361046  | -11.855539764 | -69.996267607 |
| H  | -6.612995151  | -11.852586425 | -69.999905171 | H  | -6.611256910  | -9.741860096  | -68.686812154 |
| H  | -6.602126486  | -9.738669951  | -68.690216351 | H  | -6.629509927  | -4.423188918  | -67.619193350 |
| H  | -6.616207416  | -4.411442887  | -67.636027007 | H  | -12.578792927 | -5.385607099  | -72.901059642 |
| H  | -12.581366316 | -5.385406594  | -72.904422563 | H  | -9.391736689  | -8.153346990  | -72.092967353 |
| H  | -9.399189304  | -8.156065426  | -72.086937907 | H  | -4.719207316  | -3.860397652  | -73.142394101 |
| H  | -4.719053166  | -3.869698308  | -73.148956428 | H  | -7.427959283  | -0.634530163  | -74.009227182 |
| H  | -7.425617780  | -0.639371812  | -74.003685638 | H  | -9.347213039  | -2.146705519  | -73.662444630 |
| H  | -9.346151139  | -2.151005011  | -73.661620172 | H  | -10.932805457 | -3.600441287  | -73.340704863 |
| H  | -10.932461756 | -3.604253342  | -73.348279506 | N  | -6.483471241  | -6.878822950  | -74.714082811 |
| N  | -6.479584487  | -6.876496952  | -74.734805392 | N  | -6.676483615  | -8.449387899  | -71.807042301 |
| N  | -6.673140062  | -8.445416529  | -71.810538576 | S  | -2.436037911  | -6.945398158  | -74.370456272 |
| S  | -2.459493037  | -6.951595935  | -74.303473545 | S  | -6.625000331  | -6.826403816  | -68.114783190 |
| S  | -6.613954391  | -6.816745749  | -68.121256086 | Pt | -6.668745456  | -6.336866388  | -72.581385782 |
| Pt | -6.673538426  | -6.346571287  | -72.586234104 | C  | -6.811847738  | -4.363103455  | -73.063378942 |
| C  | -6.812241181  | -4.371877045  | -73.068733687 | C  | -8.759707016  | -6.156303385  | -72.615459505 |
| C  | -8.763952658  | -6.161396663  | -72.614749879 | H  | -11.806940496 | -7.667313720  | -72.276379129 |
| H  | -11.813806412 | -7.666601501  | -72.272572757 | H  | -5.104171921  | -1.492971096  | -73.748424291 |
| H  | -5.102737375  | -1.499783861  | -73.742646734 |    |               |               |               |

### 2cb (T<sub>1</sub>)

$$\langle S^2 \rangle = 2.03374$$

|   |               |               |               |
|---|---------------|---------------|---------------|
| C | -4.581372163  | -6.466103485  | -72.775575841 |
| C | -4.196259753  | -6.819666173  | -74.164169751 |
| C | -2.227484855  | -6.545611149  | -72.643276237 |
| C | -3.456791720  | -6.331636424  | -71.987926198 |
| C | -5.155473147  | -7.023257541  | -75.151381660 |
| C | -7.476848329  | -7.038467683  | -75.584777297 |
| C | -7.269896897  | -7.360662860  | -76.930603103 |
| C | -5.944040071  | -7.521503957  | -77.396798205 |
| C | -4.897885194  | -7.354568855  | -76.519803333 |
| C | -6.664622372  | -6.021602533  | -70.597345756 |
| C | -6.648868871  | -7.176681425  | -69.832804755 |
| C | -6.637354926  | -5.121724493  | -68.445423718 |
| C | -6.658857409  | -4.846312018  | -69.788552307 |
| C | -6.651878143  | -8.486183974  | -70.444156351 |
| C | -6.681798195  | -9.589560820  | -72.511284085 |
| C | -6.664575645  | -10.839848753 | -71.904024616 |
| C | -6.638397247  | -10.897409267 | -70.506241013 |
| C | -6.631513233  | -9.719307778  | -69.771072524 |
| C | -9.208781540  | -4.860448782  | -72.967284058 |
| C | -10.582354120 | -4.592888267  | -73.068708815 |
| C | -11.516500345 | -5.600588479  | -72.821474559 |
| C | -11.081874106 | -6.880654009  | -72.471180916 |
| C | -9.709943722  | -7.150865989  | -72.368662349 |
| C | -8.135411320  | -3.877489824  | -73.205429166 |
| C | -5.734706071  | -3.497510856  | -73.259320048 |
| C | -5.952794145  | -2.155703554  | -73.599867304 |
| C | -7.254487731  | -1.674160963  | -73.745231236 |
| C | -8.337496121  | -2.531913801  | -73.548972624 |
| H | -1.227588219  | -6.497458189  | -72.233349081 |
| H | -3.485372514  | -6.075022712  | -70.933475970 |
| H | -8.477826625  | -6.904955310  | -75.187394817 |
| H | -8.121353092  | -7.480651790  | -77.589702362 |
| H | -5.755011396  | -7.771158617  | -78.435748302 |
| H | -3.870290039  | -7.467247096  | -76.849408791 |
| H | -6.669967591  | -3.838454889  | -70.184592794 |
| H | -6.701547514  | -9.481131237  | -73.590713596 |

### 2cb (T<sub>2</sub>)

$$\langle S^2 \rangle = 2.035867$$

|   |               |               |               |
|---|---------------|---------------|---------------|
| C | -4.560327361  | -6.463913167  | -72.822878995 |
| C | -4.196725678  | -6.811543725  | -74.110653527 |
| C | -2.220354430  | -6.521486858  | -72.647049800 |
| C | -3.408399926  | -6.302163262  | -71.994162023 |
| C | -5.182966006  | -7.026354445  | -75.147586400 |
| C | -7.488318616  | -7.044536499  | -75.591644960 |
| C | -7.282714258  | -7.373718510  | -76.925996085 |
| C | -5.967654130  | -7.532240063  | -77.374708759 |
| C | -4.914755015  | -7.358733744  | -76.486157715 |
| C | -6.644597352  | -5.974663400  | -70.624160226 |
| C | -6.653540659  | -7.227443387  | -69.820626269 |
| C | -6.618685818  | -5.130850339  | -68.440051511 |
| C | -6.627761155  | -4.856017891  | -69.817040035 |
| C | -6.667718852  | -8.478694529  | -70.428585310 |
| C | -6.669034175  | -9.566144938  | -72.517796669 |
| C | -6.668748367  | -10.831292486 | -71.912822717 |
| C | -6.673655322  | -10.906282670 | -70.502747385 |
| C | -6.673069787  | -9.744854551  | -69.762650668 |
| C | -9.204031434  | -4.861302425  | -72.968949908 |
| C | -10.578447627 | -4.599046477  | -73.073761400 |
| C | -11.509784980 | -5.609488447  | -72.826308593 |
| C | -11.072734897 | -6.888161235  | -72.474096153 |
| C | -9.700001593  | -7.154383695  | -72.369937137 |
| C | -8.133080295  | -3.875278963  | -73.208811138 |
| C | -5.733921884  | -3.486116352  | -73.265566985 |
| C | -5.957815508  | -2.144735525  | -73.604191211 |
| C | -7.261604689  | -1.668417569  | -73.748421645 |
| C | -8.341132416  | -2.530392162  | -73.551544954 |
| H | -1.214575586  | -6.464806524  | -72.250863260 |
| H | -3.450779510  | -6.027827616  | -70.945263922 |
| H | -8.482451899  | -6.905651284  | -75.181700870 |
| H | -8.130020592  | -7.499331059  | -77.589812960 |
| H | -5.767112251  | -7.787580469  | -78.410598095 |
| H | -3.887686709  | -7.474755274  | -76.814768319 |
| H | -6.622311052  | -3.839824262  | -70.192927335 |
| H | -6.667614816  | -9.467536938  | -73.599051313 |
| H | -6.666216359  | -11.722093909 | -72.529288282 |

|    |               |               |               |    |               |              |               |
|----|---------------|---------------|---------------|----|---------------|--------------|---------------|
| H  | -6.676795512  | -11.871287761 | -70.006348433 | H  | -6.611266806  | -9.735085463 | -68.679671436 |
| H  | -6.675820344  | -9.773423825  | -68.678112480 | H  | -6.615668767  | -4.403231453 | -67.642992038 |
| H  | -6.602666194  | -4.432763618  | -67.614853038 | H  | -12.591039094 | -5.346482485 | -72.863327187 |
| H  | -12.572524664 | -5.397571162  | -72.907934713 | H  | -9.392663755  | -8.169049689 | -72.150428593 |
| H  | -9.377302798  | -8.155522649  | -72.094365968 | H  | -4.723225565  | -3.882002404 | -73.182324229 |
| H  | -4.716640589  | -3.845127095  | -73.153419509 | H  | -7.456850615  | -0.621033767 | -73.970681382 |
| H  | -7.439437508  | -0.629213334  | -74.011217417 | H  | -9.384500826  | -2.093564603 | -73.596839881 |
| H  | -9.352375798  | -2.148572399  | -73.662748907 | H  | -10.974363916 | -3.543608412 | -73.260019091 |
| H  | -10.931913317 | -3.608710078  | -73.349399245 | N  | -6.466434115  | -6.905565663 | -74.750426704 |
| N  | -6.474664091  | -6.878593764  | -74.727497983 | N  | -6.670118354  | -8.451388877 | -71.804265708 |
| N  | -6.673114608  | -8.433930049  | -71.827236764 | S  | -2.449100075  | -6.958058618 | -74.304129725 |
| S  | -2.452222803  | -6.938501708  | -74.315927203 | S  | -6.616626524  | -6.810346621 | -68.120059616 |
| S  | -6.635640921  | -6.886975296  | -68.087244806 | Pt | -6.668095997  | -6.354644257 | -72.584966196 |
| Pt | -6.660895535  | -6.330415188  | -72.582300201 | C  | -6.794392350  | -4.393253530 | -73.074095840 |
| C  | -6.807419900  | -4.356152717  | -73.069937036 | C  | -8.746920559  | -6.184551449 | -72.628269299 |
| C  | -8.754598497  | -6.156012867  | -72.614965783 | H  | -11.817173884 | -7.657249245 | -72.324793555 |
| H  | -11.796021770 | -7.676355825  | -72.279129792 | H  | -5.126659033  | -1.503945047 | -73.780145821 |
| H  | -5.112177569  | -1.478111063  | -73.752407408 |    |               |              |               |

**2cb (T<sub>3</sub>)**

$\langle S^2 \rangle = 2.038017$

|   |               |               |               |
|---|---------------|---------------|---------------|
| C | -4.567797682  | -6.494299477  | -72.821155465 |
| C | -4.195209468  | -6.829445527  | -74.110197376 |
| C | -2.228019012  | -6.559806541  | -72.629172605 |
| C | -3.420537966  | -6.345570878  | -71.983014375 |
| C | -5.171013104  | -7.037321326  | -75.159951156 |
| C | -7.472025566  | -7.070032153  | -75.622144620 |
| C | -7.254145089  | -7.378173071  | -76.960142835 |
| C | -5.934079103  | -7.519338775  | -77.399758422 |
| C | -4.888881942  | -7.350771003  | -76.500304210 |
| C | -6.655129302  | -6.024333935  | -70.607354615 |
| C | -6.643469146  | -7.173965793  | -69.834768002 |
| C | -6.626358623  | -5.107939976  | -68.463886183 |
| C | -6.647705104  | -4.842158580  | -69.809023529 |
| C | -6.648667889  | -8.485193407  | -70.440716699 |
| C | -6.670629380  | -9.594255363  | -72.505020743 |
| C | -6.655959687  | -10.842391185 | -71.893647450 |
| C | -6.634879647  | -10.896324983 | -70.495596084 |
| C | -6.629664235  | -9.716225903  | -69.763989487 |
| C | -9.191707372  | -4.817031250  | -72.959923731 |
| C | -10.624161609 | -4.544944601  | -73.029180862 |
| C | -11.524908866 | -5.552042023  | -72.806658125 |
| C | -11.086921028 | -6.871984499  | -72.496558669 |
| C | -9.696445205  | -7.156384620  | -72.405548649 |
| C | -8.182821845  | -3.896281982  | -73.185582902 |
| C | -5.744461507  | -3.528462576  | -73.276382310 |
| C | -5.970375953  | -2.165643244  | -73.610339192 |
| C | -7.300490644  | -1.667720161  | -73.722217317 |
| C | -8.376430337  | -2.487916978  | -73.517535262 |
| H | -1.225031568  | -6.508982135  | -72.225203985 |
| H | -3.469896726  | -6.084677445  | -70.931018470 |
| H | -8.470365332  | -6.952013509  | -75.213611317 |
| H | -8.094661656  | -7.502179938  | -77.633022929 |
| H | -5.723103596  | -7.758394068  | -78.437526867 |
| H | -3.858610594  | -7.456457225  | -76.822627660 |
| H | -6.656733080  | -3.837623091  | -70.213125502 |
| H | -6.684274374  | -9.490095870  | -73.584626470 |
| H | -6.660302486  | -11.742414262 | -72.497283113 |
| H | -6.621607564  | -11.853046016 | -69.982976791 |

**2cc (S<sub>0</sub>)**

|   |               |               |               |
|---|---------------|---------------|---------------|
| C | -4.578526745  | -6.477650662  | -72.813132079 |
| C | -4.203366042  | -6.811416035  | -74.101767053 |
| C | -2.240727373  | -6.529107222  | -72.619065848 |
| C | -3.434573895  | -6.320865603  | -71.972974824 |
| C | -5.181697542  | -7.021883321  | -75.147219151 |
| C | -7.484627235  | -7.046564306  | -75.605803097 |
| C | -7.269282099  | -7.365330203  | -76.941040065 |
| C | -5.950668704  | -7.514662753  | -77.382592441 |
| C | -4.903883889  | -7.343053429  | -76.486442412 |
| C | -6.657603576  | -6.022960455  | -70.606961436 |
| C | -6.642903350  | -7.175515065  | -69.839028408 |
| C | -6.616829887  | -5.116215101  | -68.460101508 |
| C | -6.643799512  | -4.844307040  | -69.804015925 |
| C | -6.651383204  | -8.483199467  | -70.452034213 |
| C | -6.684705707  | -9.579747863  | -72.524018735 |
| C | -6.671046001  | -10.831180459 | -71.920106842 |
| C | -6.644324191  | -10.893845734 | -70.522530147 |
| C | -6.633394088  | -9.718418655  | -69.783534648 |
| C | -9.210595930  | -4.866312527  | -72.963771379 |
| C | -10.583414379 | -4.595952430  | -73.058570837 |
| C | -11.525785660 | -5.595238867  | -72.807074058 |
| C | -11.065632227 | -6.859153379  | -72.461446701 |
| C | -9.708705977  | -7.160555648  | -72.358545009 |
| C | -8.135256113  | -3.887087120  | -73.207821576 |
| C | -5.729409166  | -3.521304078  | -73.272265311 |
| C | -5.973104126  | -2.190715011  | -73.606656119 |
| C | -7.255227574  | -1.679204773  | -73.751167017 |
| C | -8.334041123  | -2.541131190  | -73.548715973 |
| H | -1.238295496  | -6.471510459  | -72.214768609 |
| H | -3.486363160  | -6.059263972  | -70.921459413 |
| H | -8.482186728  | -6.914689790  | -75.201819660 |
| H | -8.111815413  | -7.490051513  | -77.611030322 |
| H | -5.742669501  | -7.761507853  | -78.419034239 |
| H | -3.874379007  | -7.452101620  | -76.809706739 |
| H | -6.652736627  | -3.837569941  | -70.202670018 |
| H | -6.703090700  | -9.469413718  | -73.602849218 |
| H | -6.680415296  | -11.727352661 | -72.529285636 |
| H | -6.631702255  | -11.853749134 | -70.016006447 |
| H | -6.611647390  | -9.744058351  | -68.699461078 |
| H | -6.601987153  | -4.414975102  | -67.636306413 |

|    |               |              |               |    |               |              |               |
|----|---------------|--------------|---------------|----|---------------|--------------|---------------|
| H  | -12.591671038 | -5.405197294 | -72.874390696 | H  | -9.411809441  | -8.166541442 | -72.086456356 |
| H  | -9.419996448  | -8.170015385 | -72.081266185 | H  | -4.705908949  | -3.847946995 | -73.155225062 |
| H  | -4.705562099  | -3.861118598 | -73.171974580 | H  | -7.401677695  | -0.629947107 | -74.015486290 |
| H  | -7.398681811  | -0.636408854 | -74.012883267 | H  | -9.342250044  | -2.144559023 | -73.660948117 |
| H  | -9.340945305  | -2.148645055 | -73.657260810 | H  | -10.937042791 | -3.602348881 | -73.328100390 |
| H  | -10.936711208 | -3.604833156 | -73.329821274 | N  | -6.481499738  | -6.885375170 | -74.712995351 |
| N  | -6.476745504  | -6.882622919 | -74.734450843 | N  | -6.680081121  | -8.443950338 | -71.812241468 |
| N  | -6.677212821  | -8.441184805 | -71.815586926 | S  | -2.434681566  | -6.935319025 | -74.360617280 |
| S  | -2.457793923  | -6.930357670 | -74.293564701 | S  | -6.619251508  | -6.829471404 | -68.116554875 |
| S  | -6.609195130  | -6.819525464 | -68.123486568 | Pt | -6.668647188  | -6.339363787 | -72.582043021 |
| Pt | -6.673449842  | -6.350022158 | -72.587553343 | C  | -6.811187271  | -4.368371341 | -73.065548569 |
| C  | -6.811628499  | -4.378417961 | -73.072847510 | C  | -8.759385911  | -6.158390248 | -72.612668625 |
| C  | -8.763942339  | -6.164082449 | -72.611693880 | F  | -11.966066952 | -7.841732182 | -72.221388617 |
| F  | -11.973954974 | -7.840009922 | -72.214565934 | F  | -4.913850223  | -1.354677782 | -73.791463864 |
| F  | -4.911756993  | -1.365195264 | -73.795957109 |    |               |              |               |

### 2cc (T<sub>1</sub>)

$\langle S^2 \rangle = 2.03353$

|   |               |               |               |
|---|---------------|---------------|---------------|
| C | -4.584961308  | -6.459563701  | -72.773932745 |
| C | -4.195446027  | -6.817749334  | -74.159959088 |
| C | -2.232281265  | -6.520251864  | -72.636735606 |
| C | -3.464201545  | -6.309943861  | -71.984482842 |
| C | -5.152215575  | -7.026621045  | -75.148095998 |
| C | -7.473374386  | -7.050246480  | -75.584815398 |
| C | -7.263267576  | -7.374820362  | -76.929337840 |
| C | -5.936213699  | -7.532169207  | -77.393394537 |
| C | -4.891801386  | -7.359910053  | -76.515437092 |
| C | -6.660091662  | -6.021933481  | -70.596728206 |
| C | -6.647113378  | -7.177934516  | -69.834135635 |
| C | -6.626230033  | -5.124715598  | -68.445179239 |
| C | -6.648918031  | -4.847234390  | -69.788080810 |
| C | -6.655145019  | -8.485573092  | -70.449218990 |
| C | -6.690811407  | -9.581484358  | -72.521337923 |
| C | -6.678560107  | -10.833555883 | -71.918095968 |
| C | -6.651844487  | -10.896298154 | -70.520600238 |
| C | -6.639678279  | -9.721008554  | -69.780972901 |
| C | -9.208847582  | -4.861164733  | -72.962977084 |
| C | -10.582074979 | -4.593282922  | -73.058400442 |
| C | -11.522484440 | -5.594962849  | -72.809466998 |
| C | -11.059744601 | -6.858446874  | -72.465668477 |
| C | -9.702317485  | -7.157231727  | -72.362001066 |
| C | -8.135257965  | -3.880043834  | -73.204811087 |
| C | -5.729733975  | -3.510265901  | -73.263892139 |
| C | -5.974494328  | -2.180937811  | -73.602596800 |
| C | -7.257092448  | -1.671839330  | -73.750860094 |
| C | -8.334972740  | -2.535018013  | -73.548808049 |
| H | -1.233613568  | -6.461097785  | -72.225382317 |
| H | -3.496886030  | -6.045677981  | -70.932180015 |
| H | -8.475774105  | -6.919575790  | -75.190217449 |
| H | -8.113416915  | -7.499409801  | -77.589211815 |
| H | -5.745036352  | -7.783284978  | -78.431542930 |
| H | -3.863401363  | -7.469587700  | -76.843420622 |
| H | -6.656808329  | -3.838642318  | -70.182287168 |
| H | -6.710792610  | -9.469061921  | -73.600180577 |
| H | -6.689446341  | -11.729729037 | -72.527307043 |
| H | -6.640780132  | -11.856323793 | -70.014223649 |
| H | -6.619456406  | -9.747536051  | -68.696856467 |
| H | -6.614401228  | -4.427173718  | -67.618195851 |
| H | -12.588722568 | -5.407155726  | -72.877335567 |

### 2cc (T<sub>2</sub>)

$\langle S^2 \rangle = 2.035676$

|   |               |               |               |
|---|---------------|---------------|---------------|
| C | -4.565551039  | -6.458354001  | -72.819371079 |
| C | -4.196176069  | -6.804470583  | -74.106021638 |
| C | -2.227330727  | -6.497152960  | -72.636320731 |
| C | -3.418714840  | -6.285836186  | -71.986662523 |
| C | -5.179023398  | -7.025929357  | -75.144773294 |
| C | -7.483928297  | -7.056958194  | -75.592849896 |
| C | -7.273948701  | -7.386719707  | -76.926207756 |
| C | -5.957209441  | -7.538632366  | -77.372349157 |
| C | -4.906726963  | -7.358390467  | -76.482278316 |
| C | -6.641972951  | -5.976846785  | -70.624289874 |
| C | -6.653212305  | -7.229766952  | -69.822014301 |
| C | -6.609992811  | -5.134830901  | -68.440752671 |
| C | -6.620101102  | -4.858600832  | -69.818317998 |
| C | -6.670828298  | -8.478807032  | -70.433151581 |
| C | -6.678114963  | -9.559759832  | -72.527017053 |
| C | -6.680260089  | -10.826214501 | -71.925663732 |
| C | -6.682958046  | -10.906057717 | -70.515750858 |
| C | -6.678185502  | -9.747295064  | -69.771809139 |
| C | -9.204904841  | -4.861186667  | -72.963162296 |
| C | -10.578879065 | -4.597004075  | -73.059678935 |
| C | -11.517123716 | -5.600611286  | -72.809794558 |
| C | -11.052736019 | -6.863369705  | -72.465440401 |
| C | -9.694596312  | -7.159546454  | -72.362128598 |
| C | -8.133119718  | -3.878047846  | -73.208313182 |
| C | -5.728705148  | -3.502227931  | -73.276914133 |
| C | -5.978376213  | -2.173373010  | -73.613839171 |
| C | -7.262939010  | -1.667711144  | -73.757404958 |
| C | -8.337923220  | -2.533557383  | -73.551548129 |
| H | -1.223170658  | -6.431995206  | -72.237505239 |
| H | -3.466767822  | -6.010041757  | -70.938531200 |
| H | -8.479897190  | -6.923239654  | -75.185792469 |
| H | -8.119338990  | -7.517920845  | -77.591320057 |
| H | -5.753547374  | -7.794195131  | -78.407523046 |
| H | -3.878507558  | -7.469305331  | -76.808914032 |
| H | -6.611354120  | -3.841885381  | -70.192727836 |
| H | -6.678254084  | -9.457925756  | -73.607800200 |
| H | -6.681619492  | -11.714913979 | -72.545070994 |
| H | -6.687873362  | -11.872725536 | -70.022771449 |
| H | -6.679263066  | -9.779285998  | -68.687410124 |
| H | -6.589927998  | -4.436737215  | -67.615648391 |
| H | -12.583681784 | -5.414793923  | -72.878133037 |
| H | -9.399891893  | -8.168012661  | -72.087583503 |

|    |               |              |               |   |               |              |               |
|----|---------------|--------------|---------------|---|---------------|--------------|---------------|
| H  | -4.703394992  | -3.837752263 | -73.176713363 | C | -11.065715837 | -6.839357176 | -72.488072254 |
| H  | -7.411160446  | -0.626049664 | -74.020956925 | C | -9.689423393  | -7.161017672 | -72.400883423 |
| H  | -9.346511667  | -2.145280334 | -73.659326718 | C | -8.181199017  | -3.899486171 | -73.180093747 |
| H  | -10.936275907 | -3.607663911 | -73.331949625 | C | -5.742224357  | -3.545616100 | -73.296460882 |
| N  | -6.472358519  | -6.884512664 | -74.727207465 | C | -6.001981170  | -2.194124378 | -73.625145572 |
| N  | -6.678145761  | -8.429552219 | -71.832279823 | C | -7.307168702  | -1.663837132 | -73.725001319 |
| S  | -2.451177323  | -6.918391862 | -74.304909203 | C | -8.379253128  | -2.488096178 | -73.504728643 |
| S  | -6.632304035  | -6.890368381 | -68.088480435 | H | -1.231020457  | -6.475834155 | -72.212543419 |
| Pt | -6.661935739  | -6.334340519 | -72.584371400 | H | -3.483634670  | -6.064964428 | -70.926367532 |
| C  | -6.807185474  | -4.363023227 | -73.074729794 | H | -8.463654994  | -6.975732027 | -75.221754296 |
| C  | -8.755615259  | -6.157800692 | -72.611992336 | H | -8.077766984  | -7.522647879 | -77.639318021 |
| F  | -11.957409189 | -7.847687649 | -72.220394822 | H | -5.702698256  | -7.763663615 | -78.437804156 |
| F  | -4.920943600  | -1.343798823 | -73.806232143 | H | -3.844129363  | -7.450809686 | -76.817960846 |

**2cc (T<sub>3</sub>)**

$\langle S^2 \rangle = 2.036341$

|   |               |               |               |    |               |               |               |
|---|---------------|---------------|---------------|----|---------------|---------------|---------------|
| C | -4.570525834  | -6.489509471  | -72.819365787 | H  | -6.641367254  | -11.854809182 | -69.995459553 |
| C | -4.191850389  | -6.824958898  | -74.106611671 | H  | -6.623742583  | -9.740008187  | -68.687051342 |
| C | -2.232286467  | -6.535640497  | -72.619398172 | H  | -6.605569736  | -4.406435404  | -67.644073677 |
| C | -3.428306966  | -6.328666681  | -71.977239463 | H  | -12.602770531 | -5.362066279  | -72.826280017 |
| C | -5.163499406  | -7.040441461  | -75.158836709 | H  | -9.417724320  | -8.181901606  | -72.147993320 |
| C | -7.463183861  | -7.087308044  | -75.626792384 | H  | -4.711629296  | -3.872174577  | -73.219957727 |
| C | -7.239790998  | -7.393540008  | -76.964249250 | H  | -7.433355092  | -0.613979401  | -73.969888674 |
| C | -5.917777798  | -7.526410488  | -77.400506679 | H  | -9.385341900  | -2.087824946  | -73.565907883 |
| C | -4.875855333  | -7.351738815  | -76.498268465 | H  | -10.975281403 | -3.536025043  | -73.232580192 |
| C | -6.650597270  | -6.025946232  | -70.608124567 | N  | -6.460692594  | -6.917105855  | -74.752384660 |
| C | -6.643771889  | -7.175984181  | -69.836561913 | N  | -6.673331042  | -8.449180303  | -71.808668463 |
| C | -6.619244153  | -5.110726565  | -68.465252519 | S  | -2.445043889  | -6.940526288  | -74.293577401 |
| C | -6.639263087  | -4.843924249  | -69.810443312 | S  | -6.615735020  | -6.813092310  | -68.122183204 |
| C | -6.653607653  | -8.485997492  | -70.444849573 | Pt | -6.666837666  | -6.359941321  | -72.586639983 |
| C | -6.677643625  | -9.590437243  | -72.512663650 | C  | -6.793659386  | -4.401747174  | -73.082475361 |
| C | -6.668969827  | -10.839640786 | -71.903727747 | C  | -8.746101287  | -6.187657984  | -72.625844080 |
| C | -6.649839911  | -10.896861674 | -70.505789625 | F  | -11.978128701 | -7.820107777  | -72.277111510 |
| C | -6.640539886  | -9.718593178  | -69.771304304 | F  | -4.949729964  | -1.372258516  | -73.856425134 |
| C | -9.190926677  | -4.819032026  | -72.950604391 |    |               |               |               |
| C | -10.624187857 | -4.537866708  | -73.009271097 |    |               |               |               |
| C | -11.532777467 | -5.540439706  | -72.785011071 |    |               |               |               |

## 6. References

- 1 F. Juliá and P. González-Herrero, *J. Am. Chem. Soc.*, 2016, **138**, 5276–5282.
- 2 D. Poveda, Á. Vivancos, D. Bautista and P. González-Herrero, *Chem. Sci.*, 2020, **11**, 12095–12102.
- 3 J. Bin Lee, M. H. Jeon, J. K. Seo, G. Von Helden, J. U. Rohde, B. S. Zhao, J. Seo and S. Y. Hong, *Org. Lett.*, 2019, **21**, 7004–7008.
- 4 C. Zhu, D. Wang, D. Wang, Y. Zhao, W. Y. Sun and Z. Shi, *Angew. Chem. Int. Ed.*, 2018, **57**, 8848–8853.
- 5 G. M. Sheldrick, *Acta Crystallogr., Sect. A Found. Crystallogr.*, 2008, **64**, 112–122.
- 6 G. M. Sheldrick, *Acta Crystallogr. Sect. A Found. Adv.*, 2015, **71**, 3–8.
- 7 A. L. Spek, *Acta Crystallogr. Sect. C Struct. Chem.*, 2015, **71**, 9–18.
- 8 M. J. Frisch, G. W. Trucks, H. B. Schlegel, G. E. Scuseria, M. A. Robb, J. R. Cheeseman, G. Scalmani, V. Barone, B. Mennucci, G. A. Petersson, H. Nakatsuji, M. Caricato, X. Li, H. P. Hratchian, A. F. Izmaylov, J. Bloino, G. Zheng, J. L. Sonnenberg, M. Hada, M. Ehara, K. Toyota, R. Fukuda, J. Hasegawa, M. Ishida, T. Nakajima, Y. Honda, O. Kitao, H. Nakai, T. Vreven, J. A. Montgomery Jr., J. E. Peralta, F. Ogliaro, M. Bearpark, J. J. Heyd, E. Brothers, K. N. Kudin, V. N. Staroverov, R. Kobayashi, J. Normand, K. Raghavachari, A. Rendell, J. C. Burant, S. S. Iyengar, J. Tomasi, M. Cossi, N. Rega, N. J. Millam, M. Klene, J. E. Knox, J. B. Cross, V. Bakken, C. Adamo, J. Jaramillo, R. Gomperts, R. E. Stratmann, O. Yazyev, A. J. Austin, R. Cammi, C. Pomelli, J. W. Ochterski, R. L. Martin, K. Morokuma, V. G. Zakrzewski, G. A. Voth, P. Salvador, J. J. Dannenberg, S. Dapprich, A. D. Daniels, Ö. Farkas, J. B. Foresman, J. V. Ortiz, J. Cioslowski and D. J. Fox, *Gaussian 09, Revision A02*, Gaussian Inc, Wallingford, CT, 2009.
- 9 A. Becke, *J. Chem. Phys.*, 1993, **98**, 5648–5652.
- 10 C. T. Lee, W. T. Yang and R. G. Parr, *Phys. Rev. B*, 1988, **37**, 785–789.
- 11 P. C. Hariharan and J. A. Pople, *Theor. Chim. Acta*, 1973, **28**, 213–222.
- 12 M. M. Francl, W. J. Pietro, W. J. Hehre, J. S. Binkley, M. S. Gordon, D. J. Defrees and J. A. Pople, *J. Chem. Phys.*, 1982, **77**, 3654–3665.
- 13 P. J. Hay and W. R. Wadt, *J. Chem. Phys.*, 1985, **82**, 299–310.
- 14 D. Escudero and W. Thiel, *Inorg Chem*, 2014, **53**, 11015–11019.
- 15 J. Tomasi, B. Mennucci and R. Cammi, *Chem. Rev.*, 2005, **105**, 2999–3093.
- 16 E. D. Glendening, J. K. Badenhoop, A. E. Reed, J. E. Carpenter, J. A. Bohmann, C. M. Morales and F. Weinhold, NBO 5.9, Theoretical Chemistry Institute, University of Wisconsin, Madison.
- 17 J.-C. López-López, D. Bautista and P. González-Herrero, *Dalton Trans.*, 2021, 13294–13305.
- 18 F. Juliá, D. Bautista and P. González-Herrero, *Chem. Commun.*, 2016, **52**, 1657–1660.
- 19 J. C. López-López, D. Bautista and P. González-Herrero, *Chem. Eur. J.*, 2020, **26**, 11307–11315.
